# Supplementary material for: Whole Genome Sequencing of Infectious Bursal Disease Viruses Isolated from a Californian Outbreak Unravels the Underlying Virulence Markers and Highlights Positive Selection Incidence
Source: MDPI journal article supplement (doi:10.3390/v15102044), 2023-10-03
Supplement: s1 [file s1]

Supplementary information

A. Figures

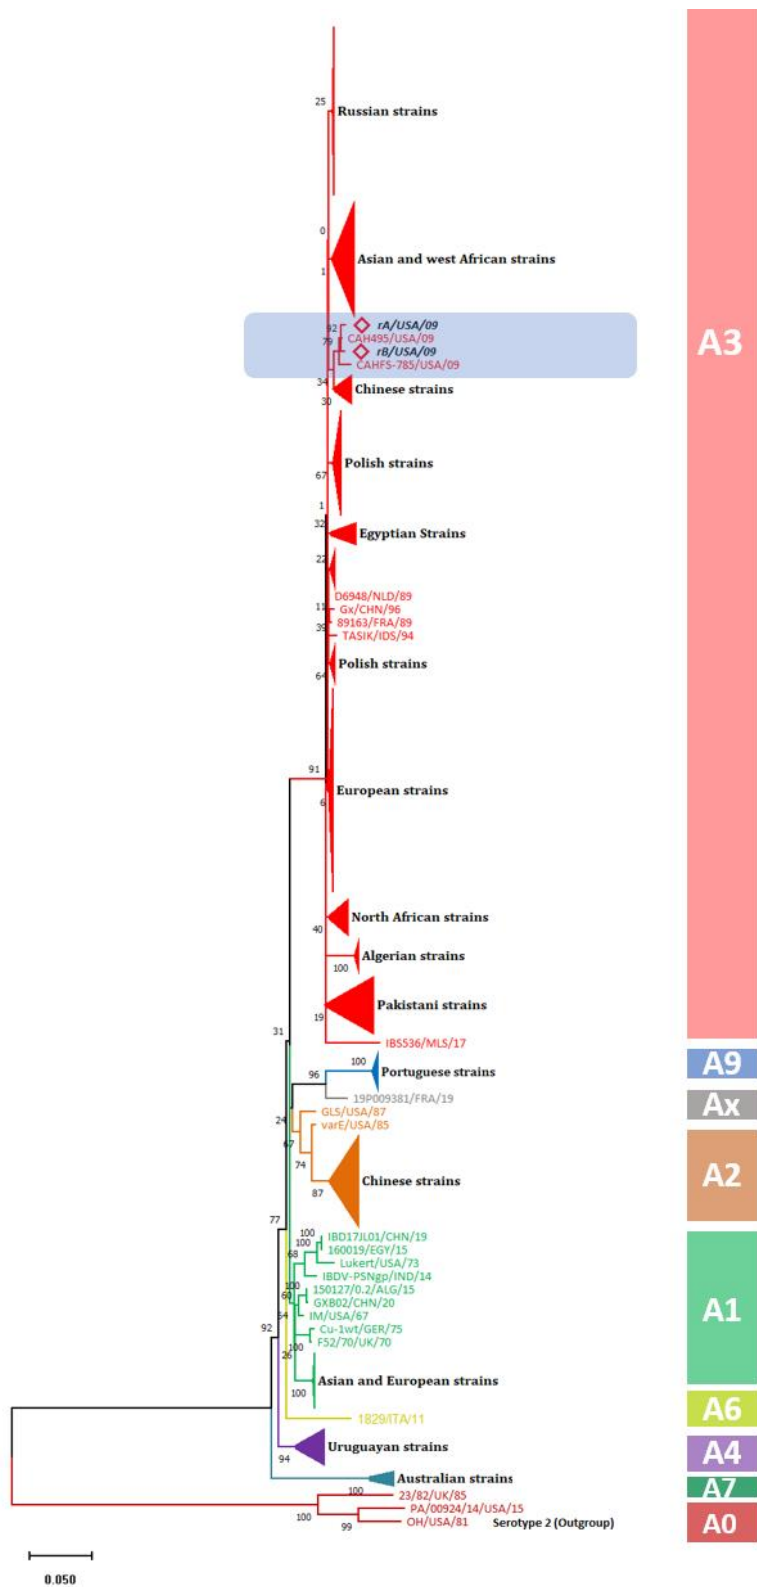

(a)

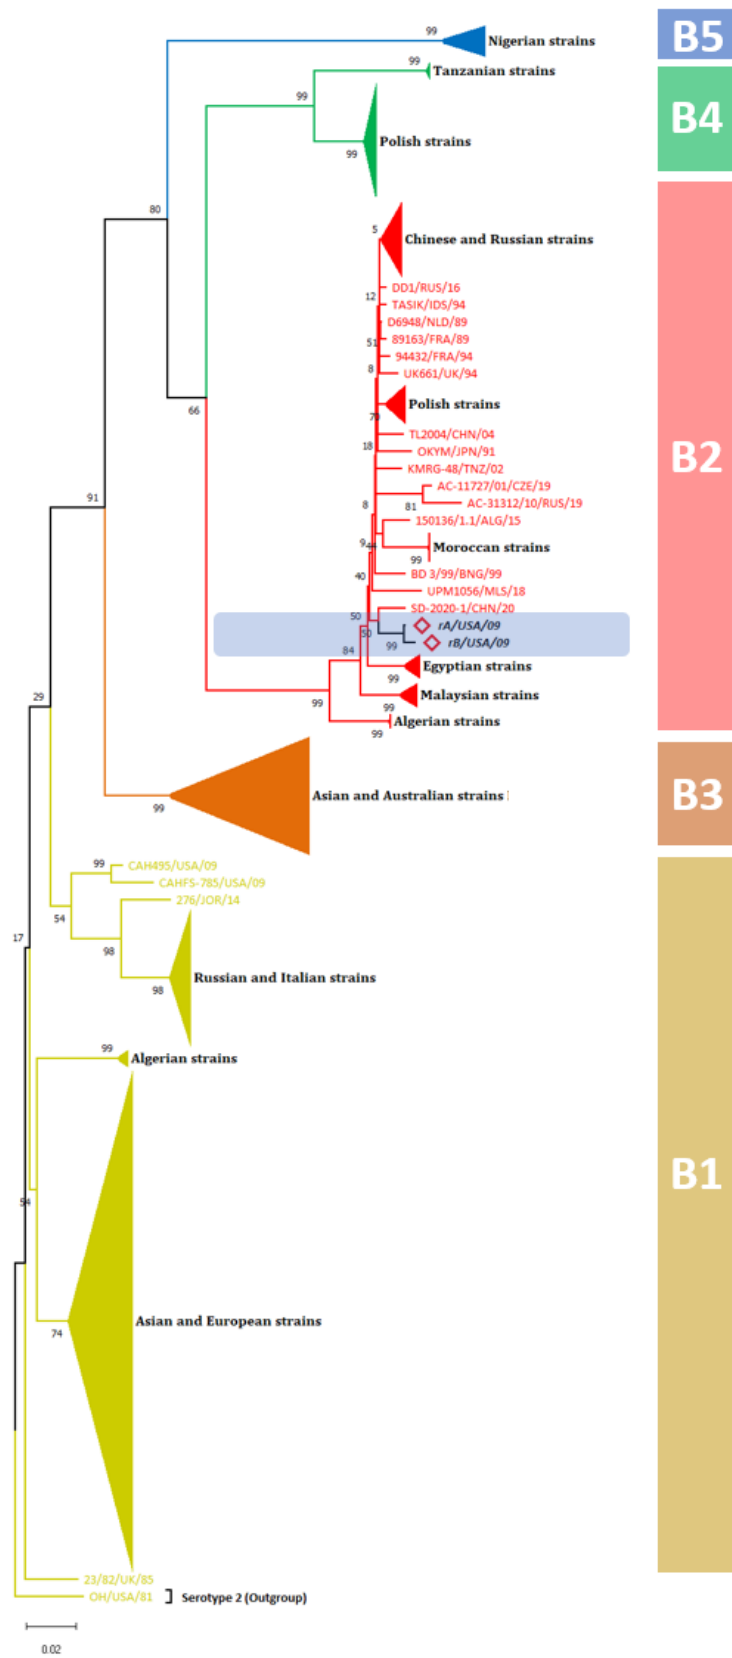

(b)

**Figure S1.** Compressed phylogenetic trees of the (a) truncated sequence of VP2 and (b) VP1 gene. Trees were inferred by using the Maximum Likelihood method and GTR + G + I model according to best fitting substitution model. Tree branches, not closely related to our isolates, were collapsed and named after the country of origin. Our isolates are denoted by italicized bold black text with red diamond and highlighted in blue.

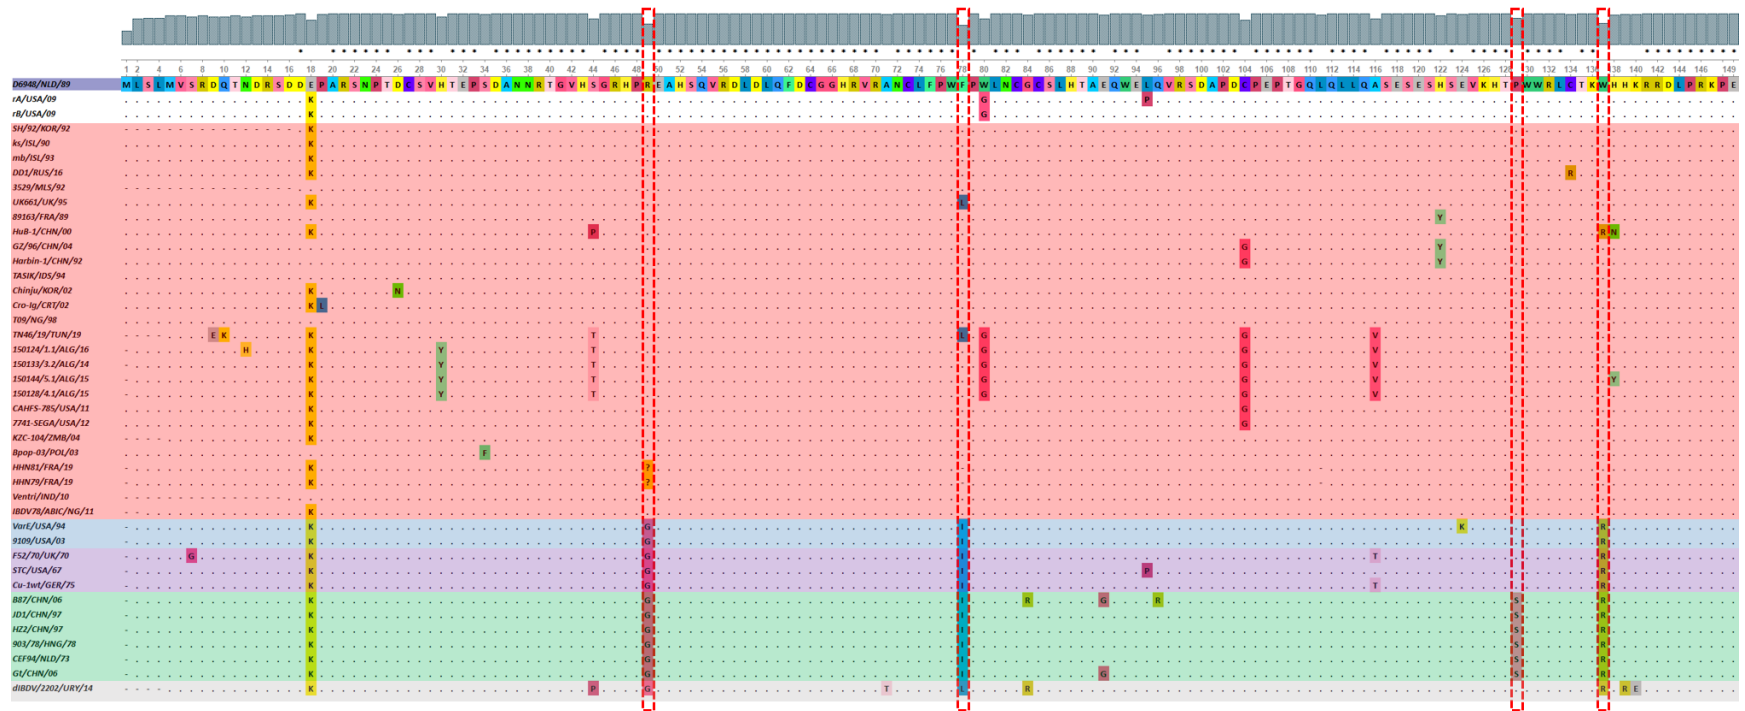

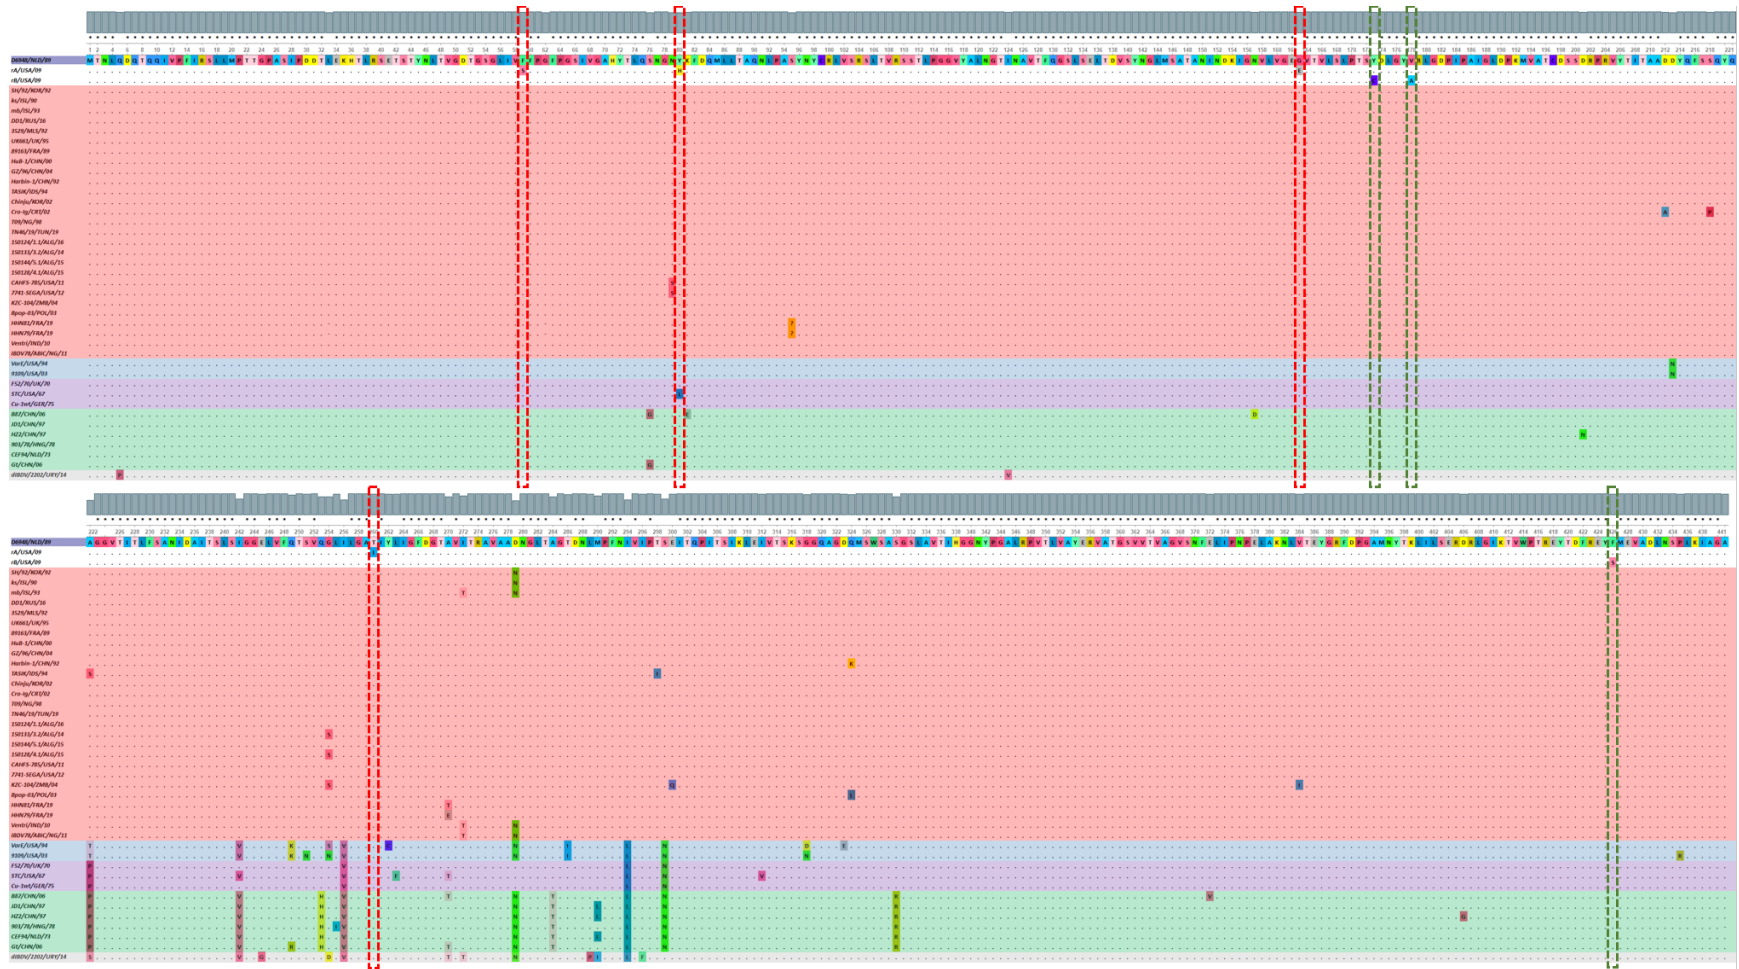

Figure S3. VP2 amino acid sequences of IBDV isolates (aa 1-441). Unique amino acid substitutions, aside from HVR, for rA and rB are boxed in dashed red and green lines, respectively. The highlights denote the different IBDV phenotypes (very virulent: red, variant: blue, classical: purple, attenuated: green and distinct: grey). D6948, the first sequence, refers to the reference vIBDV strain.

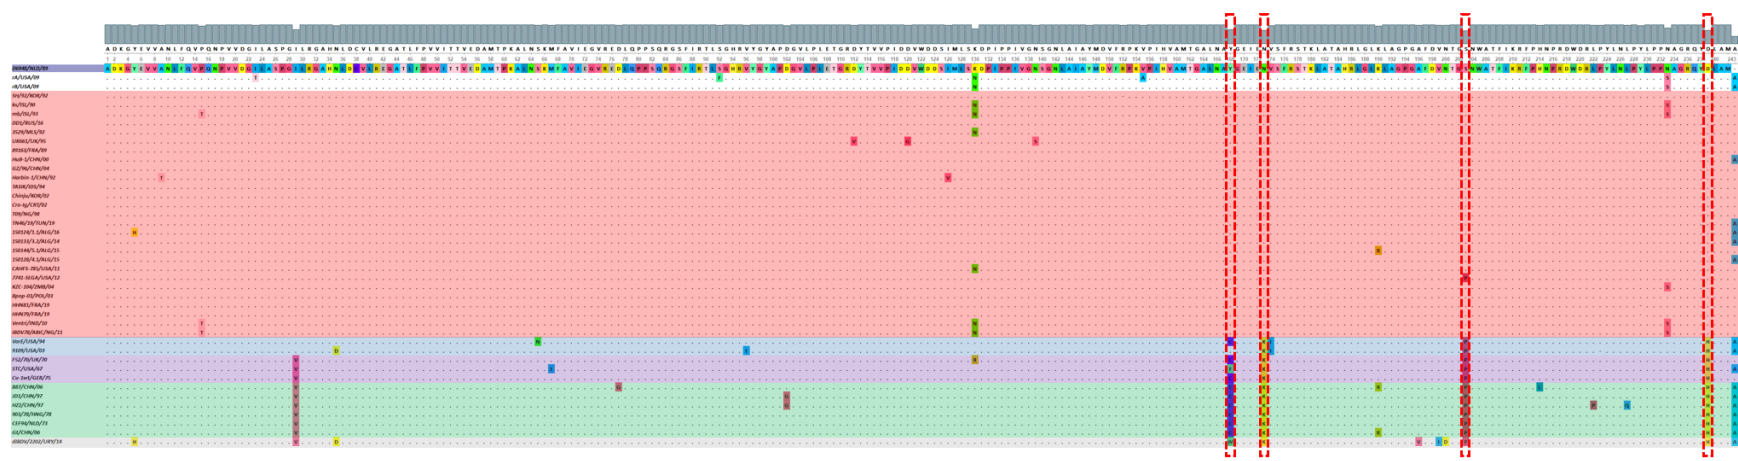

Figure S4. VP4 amino acid sequences of IBDV isolates (aa 1-243). Signature amino acids defining the vvIBDVs are boxed in dashed red lines. The highlights denote the different IBDV phenotypes (very virulent: red, variant: blue, classical: purple, attenuated: green and distinct: grey). D6948, the first sequence, refers to the reference vvIBDV strain.

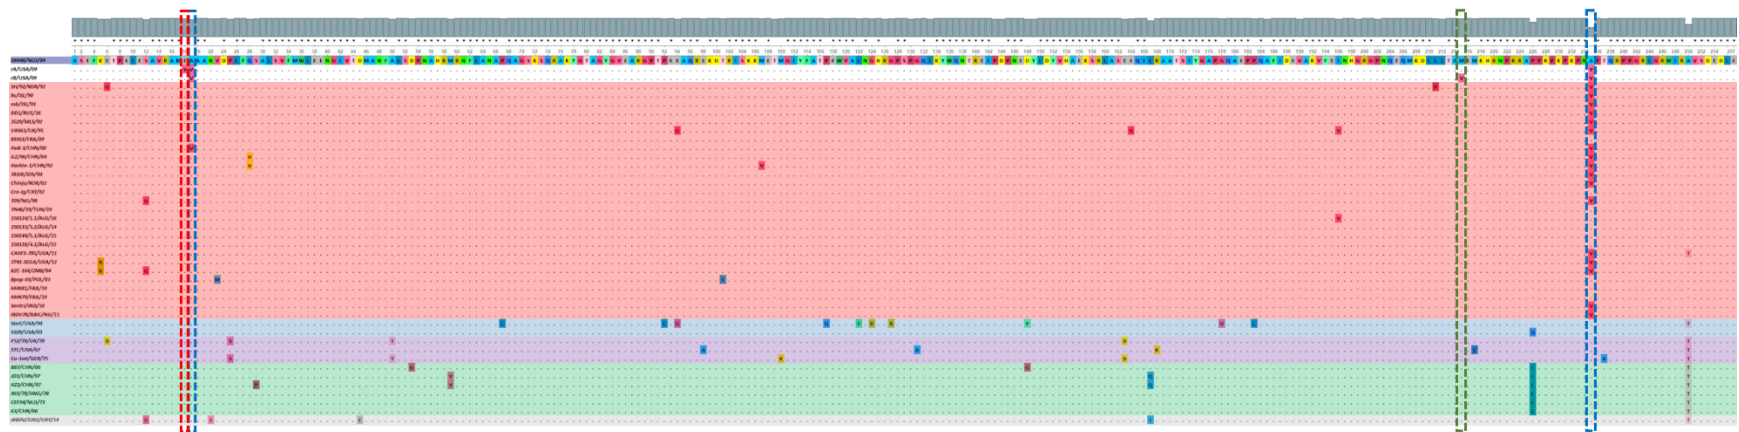

Figure S5. VP3 amino acid sequences of IBDV isolates (aa 1-257). Unique amino acid substitutions for rA and rB are boxed in dashed red and green lines, respectively. Amino acid substitution shared among rA, rB and vvIBDVs is marked by dashed blue line. The highlights denote the different IBDV phenotypes (very virulent: red, variant: blue, classical: purple, attenuated: green and distinct: grey). D6948, the first sequence, refers to the reference vvIBDV strain.



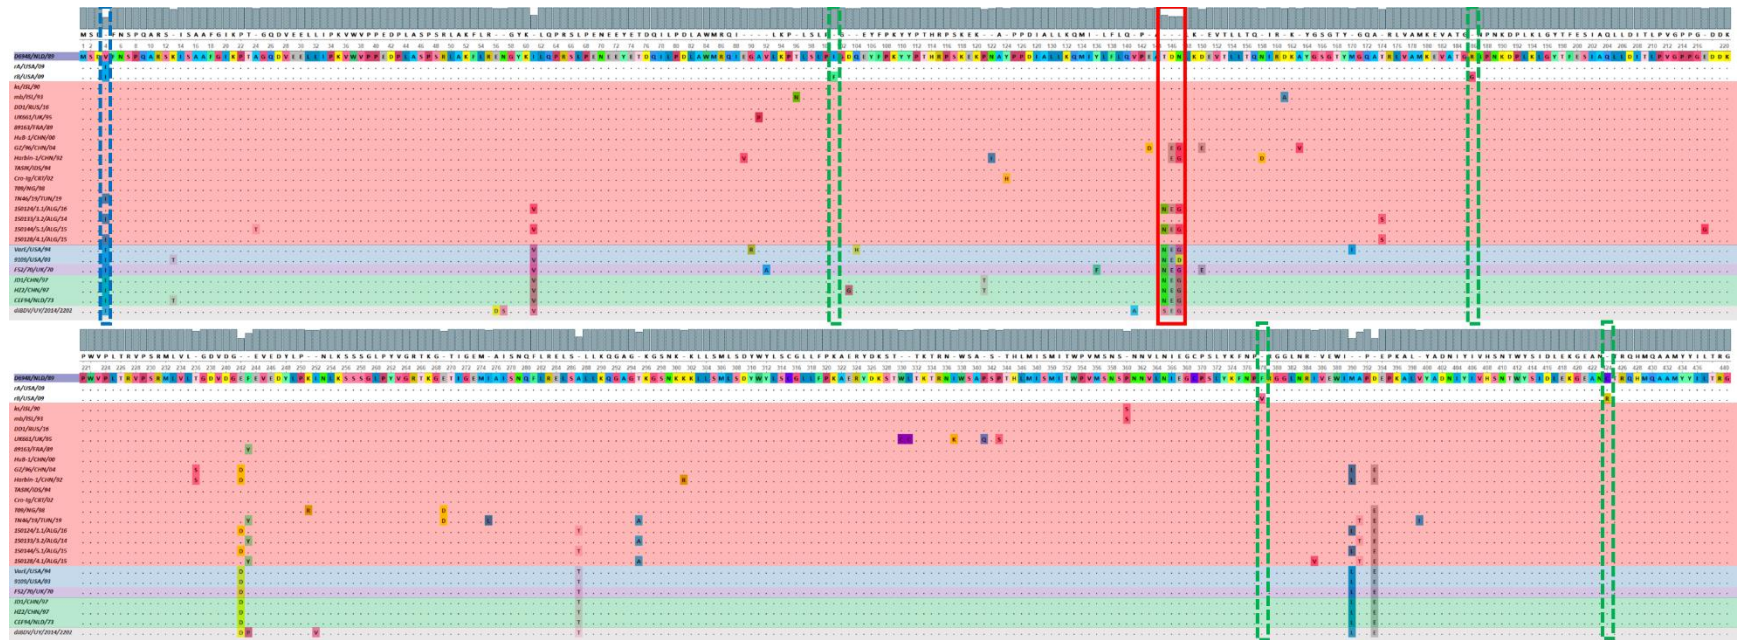



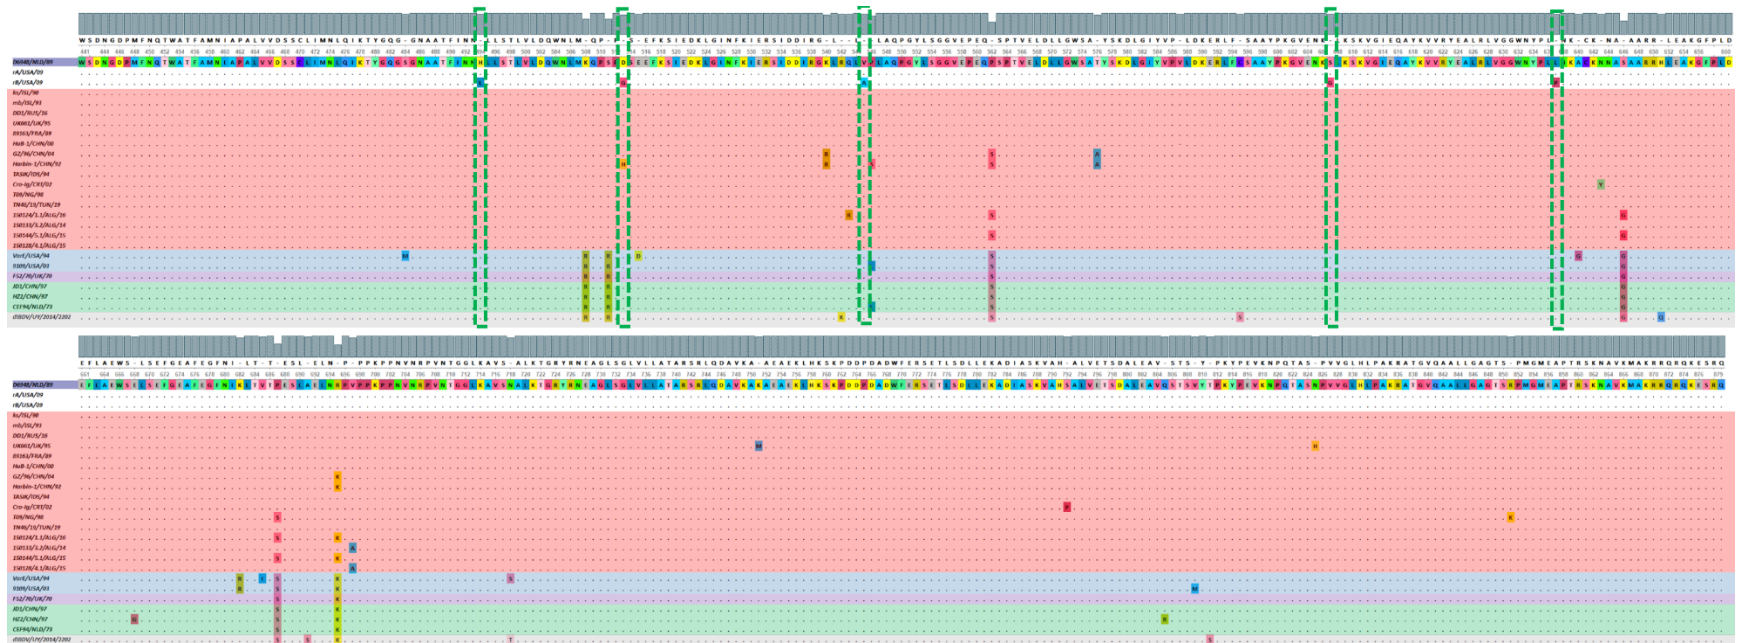

Figure S6. Aligned VP1 amino acid sequences of IBDV isolates (aa 1-879). Unique amino acid substitutions for rB are boxed in dashed green lines. Amino acid substitution shared among rA, rB and other IBDVs (belonging to various phenotypes) is marked by dashed blue line. The VP1 protein sequence TDN triplet (145-147), virulence signature, is displayed in red box. The highlights denote the different IBDV phenotypes (very virulent: red, variant: blue, classical: purple, attenuated: green and distinct: grey). D6948, the first sequence, refers to the reference vvIBDV strain.

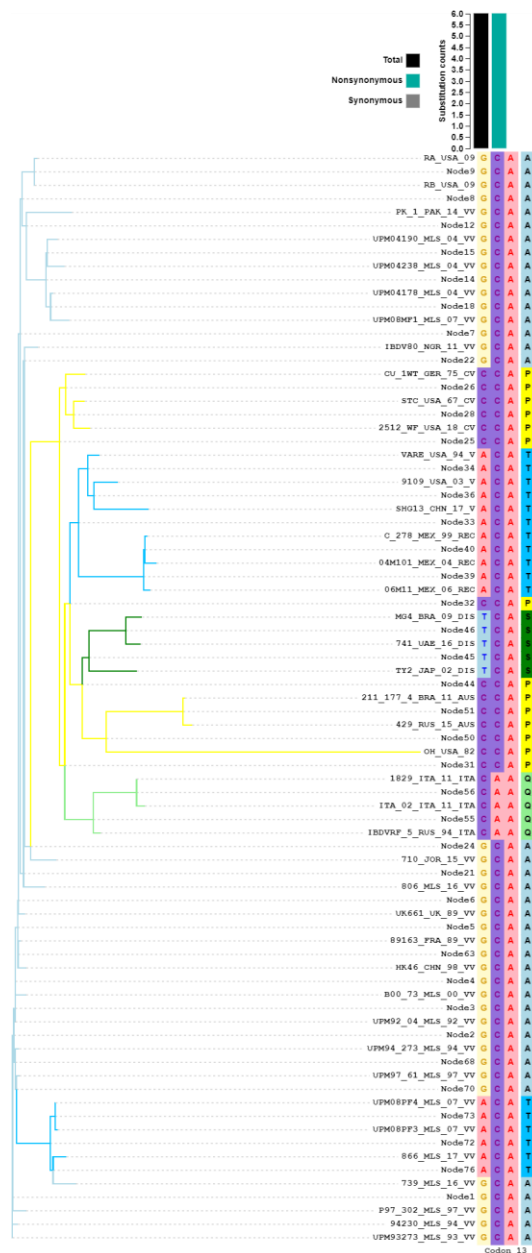

Figure S7. Codon-specific SLAC Phylogenetic Alignment tree showing aa positive selection across different sequences representing all IBDV phenotypes. The tree branch color is equivalent to the amino acid at this site (codon 13 in HVR, equivalent to codon 222 in VP2 and PP). The current study isolates rA and rB are the first two isolates in the tree. The sequences nomenclature is expressed as isolate name\_country of origin\_Collection year\_Genogroup type (cv [Classical] for G1, v [Variant] for G2, vv [Very virulent] for G3, DIS [Distinct] for G4, REC [Recombinant] for G5, ITA [Italian] for G6 and AUS [Australian] for G7).

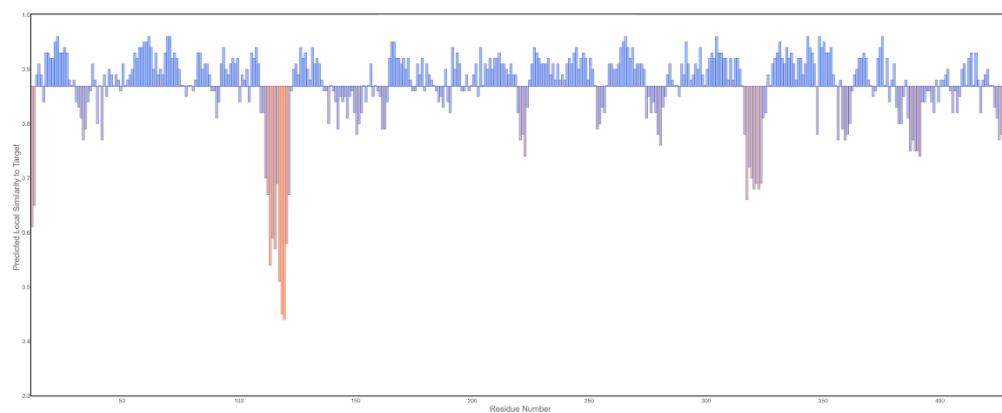

(a)

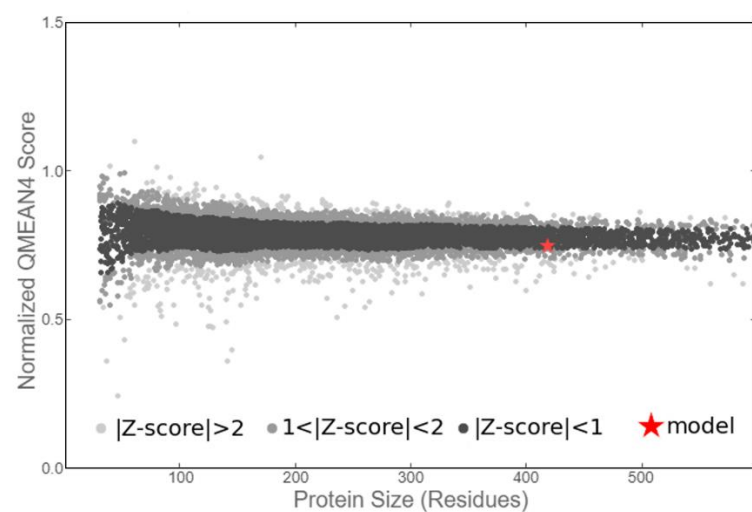

(b)

Figure S8. Quality estimation of VP2 protein modeling via (a) local quality estimate and (b) comparison with non-redundant set of PDB structures. QMEANDisCo Global is  $0.87 \pm 0.05$  which indicates our model robustness.

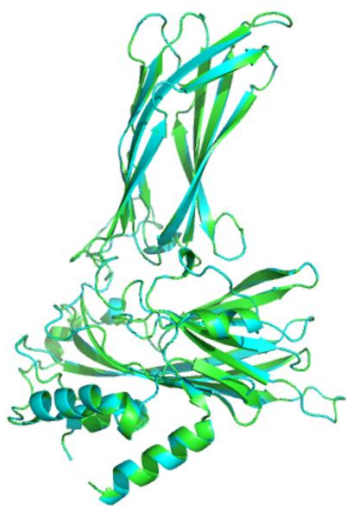

Figure S9. VP2 3D model alignment of both rA and rB isolates using Pymol. Alignment showed no molecular conformation changes since no looping or state change was noted from  $\beta$ -strand to helical structure and vice versa.

## B. Tables

Table S1. Evolutionary divergence estimates between HVR sequences of IBDV isolates.

| Species 1        | Species 2              | Distance (d)     |
|------------------|------------------------|------------------|
| <b>rA/USA/09</b> | <b>rB/USA/09</b>       | <b>0.0024264</b> |
| <b>rB/USA/09</b> | <b>89163/FRA/89/vv</b> | <b>0.0171892</b> |
| rB/USA/09        | B00/81/MLS/00/vv       | 0.0172288        |
| rB/USA/09        | 94268/MLS/94/vv        | 0.0172421        |
| rB/USA/09        | UPM92-04/MLS/92/vv     | 0.0172553        |
| <b>rA/USA/09</b> | <b>89163/FRA/89/vv</b> | <b>0.0195892</b> |
| rA/USA/09        | B00/81/MLS/00/vv       | 0.0196288        |
| rA/USA/09        | 94268/MLS/94/vv        | 0.0196421        |
| rA/USA/09        | UPM92-04/MLS/92/vv     | 0.0196553        |
| rB/USA/09        | UPM93273/MLS/93/vv     | 0.0196670        |
| rB/USA/09        | UK661/UK/89/vv         | 0.0220433        |
| rB/USA/09        | UPM97/61/MLS/97/vv     | 0.0220634        |
| rA/USA/09        | UPM93273/MLS/93/vv     | 0.0220670        |
| rB/USA/09        | HK46/CHN/98/vv         | 0.0220990        |
| rA/USA/09        | UK661/UK/89/vv         | 0.0244433        |
| rA/USA/09        | UPM97/61/MLS/97/vv     | 0.0244634        |
| rB/USA/09        | UPM94/273/MLS/94/vv    | 0.0244852        |
| rA/USA/09        | HK46/CHN/98/vv         | 0.0244990        |
| rB/USA/09        | 94230/MLS/94/vv        | 0.0245113        |
| rA/USA/09        | UPM94/273/MLS/94/vv    | 0.0268852        |
| rA/USA/09        | 94230/MLS/94/vv        | 0.0269113        |
| rB/USA/09        | B00/73/MLS/00/vv       | 0.0270187        |
| rB/USA/09        | IBDV80/NGR/11/vv       | 0.0271782        |
| rA/USA/09        | B00/73/MLS/00/vv       | 0.0294187        |
| rA/USA/09        | IBDV80/NGR/11/vv       | 0.0295782        |
| rB/USA/09        | P97/302/MLS/97/vv      | 0.0319135        |
| rA/USA/09        | P97/302/MLS/97/vv      | 0.0343135        |
| rB/USA/09        | 806/MLS/16/vv          | 0.0346809        |
| rA/USA/09        | 806/MLS/16/vv          | 0.0370809        |
| rB/USA/09        | UPM04178/MLS/04/vv     | 0.0500109        |
| rA/USA/09        | UPM04178/MLS/04/vv     | 0.0524109        |
| rB/USA/09        | UPM04190/MLS/04/vv     | 0.0524781        |
| rB/USA/09        | 710/JOR/15/vv          | 0.0535659        |
| rA/USA/09        | UPM04190/MLS/04/vv     | 0.0548781        |
| rB/USA/09        | UPM08PF4/MLS/07/vv     | 0.0554881        |
| rA/USA/09        | 710/JOR/15/vv          | 0.0559659        |
| rB/USA/09        | UPM04238/MLS/04/vv     | 0.0575892        |
| rA/USA/09        | UPM08PF4/MLS/07/vv     | 0.0578881        |
| rB/USA/09        | UPM08PF3/MLS/07/vv     | 0.0578883        |
| rA/USA/09        | UPM04238/MLS/04/vv     | 0.0599892        |
| rA/USA/09        | UPM08PF3/MLS/07/vv     | 0.0602883        |
| rB/USA/09        | PK-1/PAK/14/vv         | 0.0614246        |
| rA/USA/09        | PK-1/PAK/14/vv         | 0.0638246        |
| rB/USA/09        | UPM08MF1/MLS/07/vv     | 0.0653060        |
| rA/USA/09        | UPM08MF1/MLS/07/vv     | 0.0677060        |
| rB/USA/09        | 866/MLS/17/vv          | 0.0680983        |
| rA/USA/09        | 866/MLS/17/vv          | 0.0704983        |
| rB/USA/09        | 739/MLS/16/vv          | 0.0808111        |
| rA/USA/09        | 739/MLS/16/vv          | 0.0832111        |
| rB/USA/09        | STC/USA/67/Cv          | 0.0864294        |
| rA/USA/09        | STC/USA/67/Cv          | 0.0888294        |
| rB/USA/09        | Cu-1wt/GER/75/Cv       | 0.0912025        |
| rB/USA/09        | 2512-WF/USA/18/Cv      | 0.0917685        |

|           |                      |           |
|-----------|----------------------|-----------|
| rA/USA/09 | Cu-1wt/GER/75/Cv     | 0.0936025 |
| rA/USA/09 | 2512-WF/USA/18/Cv    | 0.0941685 |
| rB/USA/09 | IBDVRF-5/RUS/94/ITA  | 0.1002234 |
| rB/USA/09 | VarE/USA/94/v        | 0.1013795 |
| rA/USA/09 | IBDVRF-5/RUS/94/ITA  | 0.1026234 |
| rA/USA/09 | VarE/USA/94/v        | 0.1037795 |
| rB/USA/09 | 9109/USA/03/v        | 0.1297360 |
| rA/USA/09 | 9109/USA/03/v        | 0.1321360 |
| rB/USA/09 | TY2/JAP/02/DIS       | 0.1347998 |
| rB/USA/09 | 1829/ITA/11/ITA      | 0.1353884 |
| rB/USA/09 | ITA-02/ITA/11/ITA    | 0.1362449 |
| rA/USA/09 | TY2/JAP/02/DIS       | 0.1371998 |
| rA/USA/09 | 1829/ITA/11/ITA      | 0.1377884 |
| rA/USA/09 | ITA-02/ITA/11/ITA    | 0.1386449 |
| rB/USA/09 | MG4/BRA/09/DIS       | 0.1628463 |
| rB/USA/09 | SHG13/CHN/17/v       | 0.1639328 |
| rB/USA/09 | 741/UAE/16/DIS       | 0.1649308 |
| rA/USA/09 | MG4/BRA/09/DIS       | 0.1652463 |
| rB/USA/09 | C-278/MEX/99/REC     | 0.1658685 |
| rA/USA/09 | SHG13/CHN/17/v       | 0.1663328 |
| rB/USA/09 | 06M11/MEX/06/REC     | 0.1672374 |
| rA/USA/09 | 741/UAE/16/DIS       | 0.1673308 |
| rA/USA/09 | C-278/MEX/99/REC     | 0.1682685 |
| rA/USA/09 | 06M11/MEX/06/REC     | 0.1696374 |
| rB/USA/09 | 04M101/MEX/04/REC    | 0.1736745 |
| rA/USA/09 | 04M101/MEX/04/REC    | 0.1760745 |
| rB/USA/09 | 211-177-4/BRA/11/AUS | 0.2029601 |
| rA/USA/09 | 211-177-4/BRA/11/AUS | 0.2053601 |
| rB/USA/09 | 429/RUS/15/AUS       | 0.2127904 |
| rB/USA/09 | V877-W/AUS/09/AUS    | 0.2127904 |
| rA/USA/09 | 429/RUS/15/AUS       | 0.2151904 |
| rA/USA/09 | V877-W/AUS/09/AUS    | 0.2151904 |
| rB/USA/09 | OH/USA/82            | 0.7358425 |
| rA/USA/09 | OH/USA/82            | 0.7382425 |

rA and rB, displaying the closest evolutionary distance to each other, are shown in bold red. The isolate in bold black is the next closest to rA or rB.

Table S2. Best fitting model selection for VP2 HVR using Maximum Likelihood fits of 24 different nucleotide substitution models.

| Model        | BIC           | AICc   | lnL     | I     | G     | R     | FreqA | FreqT | FreqC | FreqG | A=>T | A=>C | A=>G | T=>A | T=>C | T=>G | C=>A | C=>T | C=>G | G=>A | G=>T | G=>C |
|--------------|---------------|--------|---------|-------|-------|-------|-------|-------|-------|-------|------|------|------|------|------|------|------|------|------|------|------|------|
| <b>K2+G*</b> | <b>6754.7</b> | 6056.7 | -2938.9 | n/a   | 0.472 | 3.316 | 0.25  | 0.25  | 0.25  | 0.25  | 0.03 | 0.03 | 0.19 | 0.03 | 0.19 | 0.03 | 0.03 | 0.19 | 0.03 | 0.19 | 0.03 | 0.03 |
| K2+G+I       | 6764.5        | 6058.6 | -2938.9 | 0.069 | 0.541 | 3.344 | 0.25  | 0.25  | 0.25  | 0.25  | 0.03 | 0.03 | 0.19 | 0.03 | 0.19 | 0.03 | 0.03 | 0.19 | 0.03 | 0.19 | 0.03 | 0.03 |
| T92+G        | 6766.8        | 6061.0 | -2940.0 | n/a   | 0.469 | 3.332 | 0.239 | 0.239 | 0.261 | 0.261 | 0.03 | 0.03 | 0.2  | 0.03 | 0.2  | 0.03 | 0.03 | 0.18 | 0.03 | 0.18 | 0.03 | 0.03 |
| GTR+G        | 6770.7        | 6017.9 | -2912.4 | n/a   | 0.453 | 3.271 | 0.271 | 0.208 | 0.273 | 0.248 | 0.05 | 0.04 | 0.17 | 0.06 | 0.23 | 0.01 | 0.04 | 0.18 | 0.01 | 0.19 | 0.01 | 0.01 |
| HKY+G        | 6771.9        | 6050.4 | -2932.7 | n/a   | 0.461 | 3.406 | 0.271 | 0.208 | 0.273 | 0.248 | 0.02 | 0.03 | 0.19 | 0.03 | 0.21 | 0.03 | 0.03 | 0.16 | 0.03 | 0.21 | 0.02 | 0.03 |
| T92+G+I      | 6776.4        | 6062.8 | -2939.9 | 0.065 | 0.537 | 3.344 | 0.239 | 0.239 | 0.261 | 0.261 | 0.03 | 0.03 | 0.2  | 0.03 | 0.2  | 0.03 | 0.03 | 0.18 | 0.03 | 0.18 | 0.03 | 0.03 |
| TN93+G       | 6779.7        | 6050.3 | -2931.7 | n/a   | 0.464 | 3.390 | 0.271 | 0.208 | 0.273 | 0.248 | 0.02 | 0.03 | 0.17 | 0.03 | 0.24 | 0.03 | 0.03 | 0.18 | 0.03 | 0.19 | 0.02 | 0.03 |
| GTR+G+I      | 6780.0        | 6019.3 | -2912.2 | 0.057 | 0.509 | 3.282 | 0.271 | 0.208 | 0.273 | 0.248 | 0.05 | 0.04 | 0.17 | 0.06 | 0.23 | 0.01 | 0.04 | 0.18 | 0.01 | 0.19 | 0.01 | 0.01 |
| HKY+G+I      | 6781.6        | 6052.3 | -2932.7 | 0.062 | 0.524 | 3.423 | 0.271 | 0.208 | 0.273 | 0.248 | 0.02 | 0.03 | 0.19 | 0.03 | 0.21 | 0.03 | 0.03 | 0.16 | 0.03 | 0.21 | 0.02 | 0.03 |
| TN93+G+I     | 6789.5        | 6052.3 | -2931.7 | 0.053 | 0.518 | 3.402 | 0.271 | 0.208 | 0.273 | 0.248 | 0.02 | 0.03 | 0.17 | 0.03 | 0.24 | 0.03 | 0.03 | 0.18 | 0.03 | 0.19 | 0.02 | 0.03 |
| K2+I         | 6807.0        | 6109.0 | -2965.1 | 0.438 | n/a   | 3.134 | 0.250 | 0.250 | 0.250 | 0.250 | 0.03 | 0.03 | 0.19 | 0.03 | 0.19 | 0.03 | 0.03 | 0.19 | 0.03 | 0.19 | 0.03 | 0.03 |
| T92+I        | 6818.8        | 6113.0 | -2966.1 | 0.438 | n/a   | 3.145 | 0.239 | 0.239 | 0.261 | 0.261 | 0.03 | 0.03 | 0.2  | 0.03 | 0.2  | 0.03 | 0.03 | 0.18 | 0.03 | 0.18 | 0.03 | 0.03 |
| HKY+I        | 6822.2        | 6100.7 | -2957.9 | 0.440 | n/a   | 3.207 | 0.271 | 0.208 | 0.273 | 0.248 | 0.02 | 0.03 | 0.19 | 0.03 | 0.21 | 0.03 | 0.03 | 0.16 | 0.03 | 0.21 | 0.02 | 0.03 |
| TN93+I       | 6828.3        | 6098.9 | -2956.0 | 0.441 | n/a   | 3.233 | 0.271 | 0.208 | 0.273 | 0.248 | 0.02 | 0.03 | 0.17 | 0.03 | 0.24 | 0.03 | 0.03 | 0.18 | 0.03 | 0.18 | 0.02 | 0.03 |
| GTR+I        | 6849.3        | 6096.5 | -2951.7 | 0.435 | n/a   | 2.349 | 0.271 | 0.208 | 0.273 | 0.248 | 0.04 | 0.04 | 0.17 | 0.06 | 0.2  | 0.03 | 0.04 | 0.15 | 0.03 | 0.19 | 0.02 | 0.03 |
| K2           | 6978.7        | 6288.5 | -3055.8 | n/a   | n/a   | 2.672 | 0.250 | 0.250 | 0.250 | 0.250 | 0.03 | 0.03 | 0.18 | 0.03 | 0.18 | 0.03 | 0.03 | 0.18 | 0.03 | 0.18 | 0.03 | 0.03 |
| T92          | 6992.3        | 6294.3 | -3057.7 | n/a   | n/a   | 2.673 | 0.239 | 0.239 | 0.261 | 0.261 | 0.03 | 0.04 | 0.19 | 0.03 | 0.19 | 0.04 | 0.03 | 0.17 | 0.04 | 0.17 | 0.03 | 0.04 |
| HKY          | 7000.8        | 6287.1 | -3052.1 | n/a   | n/a   | 2.682 | 0.271 | 0.208 | 0.273 | 0.248 | 0.03 | 0.04 | 0.18 | 0.04 | 0.2  | 0.03 | 0.04 | 0.15 | 0.03 | 0.2  | 0.03 | 0.04 |
| TN93         | 7007.3        | 6285.8 | -3050.5 | n/a   | n/a   | 2.684 | 0.271 | 0.208 | 0.273 | 0.248 | 0.03 | 0.04 | 0.16 | 0.04 | 0.22 | 0.03 | 0.04 | 0.17 | 0.03 | 0.18 | 0.03 | 0.04 |
| GTR          | 7023.6        | 6278.6 | -3043.8 | n/a   | n/a   | 2.094 | 0.271 | 0.208 | 0.273 | 0.248 | 0.04 | 0.05 | 0.16 | 0.05 | 0.19 | 0.03 | 0.05 | 0.14 | 0.03 | 0.18 | 0.02 | 0.03 |
| JC+G         | 7065.4        | 6375.3 | -3099.2 | n/a   | 0.543 | 0.5   | 0.25  | 0.25  | 0.25  | 0.25  | 0.08 | 0.08 | 0.08 | 0.08 | 0.08 | 0.08 | 0.08 | 0.08 | 0.08 | 0.08 | 0.08 | 0.08 |
| JC+G+I       | 7075.1        | 6377.1 | -3099.1 | 0.087 | 0.656 | 0.5   | 0.25  | 0.25  | 0.25  | 0.25  | 0.08 | 0.08 | 0.08 | 0.08 | 0.08 | 0.08 | 0.08 | 0.08 | 0.08 | 0.08 | 0.08 | 0.08 |
| JC+I         | 7109.1        | 6418.9 | -3121.0 | 0.427 | n/a   | 0.5   | 0.25  | 0.25  | 0.25  | 0.25  | 0.08 | 0.08 | 0.08 | 0.08 | 0.08 | 0.08 | 0.08 | 0.08 | 0.08 | 0.08 | 0.08 | 0.08 |
| JC           | 7258.0        | 6575.7 | -3200.4 | n/a   | n/a   | 0.5   | 0.25  | 0.25  | 0.25  | 0.25  | 0.08 | 0.08 | 0.08 | 0.08 | 0.08 | 0.08 | 0.08 | 0.08 | 0.08 | 0.08 | 0.08 | 0.08 |

\*Model with the lowest BIC scores (Bayesian Information Criterion) is considered to best describe the substitution pattern (shown in bold red). For each model, AICc value (Akaike Information Criterion, corrected), Maximum Likelihood value (lnL), and the number of parameters (including branch lengths) are also depicted above. 5 rate categories-discrete Gamma distribution (+G) was applied for modeling the evolutionary rates non-uniformity among sites and supposing that a certain fraction of sites is evolutionarily invariable (+I). Proposed or estimated values of transition/transversion bias (R) for each model are displayed. They are followed by nucleotide frequencies (f) and rates of base substitutions (r) for each nucleotide pair. A total of 435 positions existed in the final dataset. Abbreviations: K2: Kimura 2-parameter; TR: General Time Reversible; HKY: Hasegawa-Kishino-Yano; TN93: Tamura-Nei; T92: Tamura 3-parameter; JC: Jukes-Cantor.



Table S3. Accession numbers of sequences used for phylogenetic analysis of IBDV HVR for genotyping.

| Accession number | Isolate     | Country   | Year | Classification | Abbreviated name*    | Genogroup |
|------------------|-------------|-----------|------|----------------|----------------------|-----------|
| AF362747         | Cu-1 wt     | Germany   | 1975 | Classical      | Cu-1wt/GER/75/Cv     | 1         |
| D00499           | STC         | USA       | 1967 | Classical      | STC/USA/67/Cv        | 1         |
| MH329181         | 2512        | USA       | 2018 | Classical      | 2512-WF/USA/18/Cv    | 1         |
|                  | Winterfield |           |      |                |                      |           |
| AF133904         | Var E       | USA       | 1994 | Variant        | VarE/USA/94/v        | 2         |
| AY462027         | 9109        | USA       | 2003 | Variant        | 9109/USA/03/v        | 2         |
| MH879090         | SHG13       | China     | 2017 | Variant        | SHG13/CHN/17/v       | 2         |
| GQ131541         | UPM08PF4    | Malaysia  | 2007 | Very virulent  | UPM08PF4/MLS/07/vv   | 3         |
| GQ131540         | UPM08PF3    | Malaysia  | 2007 | Very virulent  | UPM08PF3/MLS/07/vv   | 3         |
| MF142587         | 866         | Malaysia  | 2017 | Very virulent  | 866/MLS/07/vv        | 3         |
| MF142568         | 739         | Malaysia  | 2016 | Very virulent  | 739/MLS/16/vv        | 3         |
| AF247006         | UPM97/61    | Malaysia  | 1997 | Very virulent  | UPM97/61/MLS/97/vv   | 3         |
| AF248612         | UPM94/273   | Malaysia  | 1994 | Very virulent  | UPM94/273/MLS/94/vv  | 3         |
| AY245550         | UPM93273    | Malaysia  | 1993 | Very virulent  | UPM93273/MLS/93/vv   | 3         |
| AY520911         | 94230       | Malaysia  | 1994 | Very virulent  | 94230/MLS/94/vv      | 3         |
| AF464901         | P97/302     | Malaysia  | 1997 | Very virulent  | P97/302/MLS/97/vv    | 3         |
| AY520910         | B00/81      | Malaysia  | 2000 | Very virulent  | B00/81/MLS/00/vv     | 3         |
| AF262030         | UPM92-04    | Malaysia  | 1992 | Very virulent  | UPM92-04/MLS/92/vv   | 3         |
| AY333088         | 94268       | Malaysia  | 1994 | Very virulent  | 94268/MLS/94/vv      | 3         |
| AY520909         | B00/73      | Malaysia  | 2000 | Very virulent  | B00/73/MLS/00/vv     | 3         |
| AY791998         | UPM04190    | Malaysia  | 2004 | Very virulent  | UPM04190/MLS/04/vv   | 3         |
| DQ000436         | UPM04238    | Malaysia  | 2004 | Very virulent  | UPM04238/MLS/04/vv   | 3         |
| AY970665         | UPM04178    | Malaysia  | 2004 | Very virulent  | UPM04178/MLS/04/vv   | 3         |
| GQ131544         | UPM08MF1    | Malaysia  | 2007 | Very virulent  | UPM08MF1/MLS/07/vv   | 3         |
| HG974563         | 89163       | France    | 1989 | Very virulent  | 89163/FRA/89/vv      | 3         |
| AF092943         | HK46        | China     | 1998 | Very virulent  | HK46/CHN/98/vv       | 3         |
| NC_004178        | UK661       | UK        | 1989 | Very virulent  | UK661/UK/89/vv       | 3         |
| KT281984         | PK-1        | Pakistan  | 2014 | Very virulent  | PK-1/PAK/14/vv       | 3         |
| MF142584         | 806         | Malaysia  | 2016 | Very virulent  | 806/MLS/16/vv        | 3         |
| JX424079         | IBDV80      | Nigeria   | 2011 | Very virulent  | IBDV80/NGR/11/vv     | 3         |
| MF142560         | 710         | Jordan    | 2015 | Very virulent  | 710/JOR/15/vv        | 3         |
| JN982252         | MG4         | Brazil    | 2009 | distinct       | MG4/BRA/09/DIS       | 4         |
| MF142569         | 741         | UAE       | 2016 | distinct       | 741/UAE/16/DIS       | 4         |
| LC136880         | TY2         | Japan     | 2002 | distinct       | TY2/JAP/02/DIS       | 4         |
| JQ277695         | 06M11       | Mexico    | 2006 | Recombinant    | 06M11/MEX/06/REC     | 5         |
| AF498627         | C-278       | Mexico    | 1999 | Recombinant    | C-278/MEX/99/REC     | 5         |
| DQ916210         | 04M101      | Mexico    | 2004 | Recombinant    | 04M101/MEX/04/REC    | 5         |
| Z97002           | IBDVRF-5    | Russia    | 1994 | Italian        | IBDVRF-5/RUS/94/ITA  | 6         |
| KY930929         | 1829        | Italy     | 2011 | Italian        | 1829/ITA/11/ITA      | 6         |
| JN852986         | ITA-02      | Italy     | 2011 | Italian        | ITA-02/ITA/11/ITA    | 6         |
| KY612971         | 211-177-4   | Brazil    | 2011 | Australian     | 211-177-4/BRA/11/AUS | 7         |
| MF142536         | 429         | Russia    | 2015 | Australian     | 429/RUS/15/AUS       | 7         |
| HM071991         | V877-W      | Australia | 2009 | Australian     | V877-W/AUS/09/AUS    | 7         |
| U30818           | OH          | USA       | 1982 | Serotype 2     | OH/USA/82            | N/A       |

\*Abbreviated name followed the order of  
Isolate\_name/Country\_of\_origin/Collection\_year/Classification.

Table S4. Accession numbers of sequences used for amino acid sequence analysis of VP2-HVR.

| Accession number | Isolate          | Abbreviated name* | Country     | Year | Phenotype                      |
|------------------|------------------|-------------------|-------------|------|--------------------------------|
| DQ927040         | mb               | mb/ISL/93         | Israel      | 2008 | very virulent                  |
| JX424077         | IBDV78/ABIC      | IBDV78/ABIC/NG/11 | Nigeria     | 2011 | very virulent                  |
| KJ547670         | Ventri-IBDV-Plus | Ventri/IND/10     | India       | 2010 | very virulent                  |
| DQ927042         | ks               | ks/ISL/90         | Israel      | 1990 | very virulent                  |
| AF533670         | SH/92            | SH/92/KOR/92      | South Korea | 1992 | very virulent                  |
| KF569805         | HuB-1            | HuB-1/CHN/00      | China       | 2000 | Very virulent                  |
| AY099456         | T09 (NIE009t)    | T09/NG/98         | Nigeria     | 1998 | Very virulent                  |
| AF508176         | Chinju           | Chinju/KOR/02     | South Korea | 2002 | Very virulent                  |
| KC189836         | 3529/92          | 3529/MLS/92       | Malaysia    | 1992 | Very virulent                  |
| MH644846         | DD1              | DD1/RUS/16        | Russia      | 2016 | Very virulent                  |
| AF322444         | TASIK            | TASIK/IDS/94      | Indonesia   | 1994 | Very virulent                  |
| HG974563         | 89163            | 89163/FRA/89      | France      | 1989 | Very virulent                  |
| AF240686         | D6948            | D6948/NLD/89      | Netherlands | 1989 | Very virulent                  |
| JF907702         | CAHFS-785-SESW   | CAHFS-785/USA/11  | USA         | 2011 | Very virulent<br>(Reassortant) |
| AY598356         | GZ/96            | GZ/96/CHN/04      | China       | 2004 | Very virulent                  |
| EF517528         | Harbin-1         | Harbin-1/CHN/92   | China       | 1992 | Very virulent                  |
| EU184685         | Cro-Ig/02        | Cro-Ig/CRT/02     | Croatia     | 2002 | Very virulent                  |
| AB368968         | KZC-104          | KZC-104/ZMB/04    | Zambia      | 2004 | Very virulent<br>(Reassortant) |
| JQ403646         | 7741-SEGA-SESW   | 7741-SEGA/USA/12  | USA         | 2012 | Very virulent<br>(Reassortant) |
| MF969105         | 150124/1.1       | 150124/1.1/ALG/16 | Algeria     | 2016 | Very virulent                  |
| X92760           | UK661            | UK661/UK/95       | UK          | 1995 | Very virulent                  |
| MH545934         | Bpop/03          | Bpop-03/POL/03    | Poland      | 2003 | Very virulent<br>(Reassortant) |
| MN480311         | TN46/19          | TN46/19/TUN/19    | Tunisia     | 2019 | Very virulent                  |
| MF969109         | 150128/4.1       | 150128/4.1/ALG/15 | Algeria     | 2015 | Very virulent                  |
| MF969111         | 150133/3.2       | 150133/3.2/ALG/14 | Algeria     | 2014 | Very virulent                  |
| MF969115         | 150144/5.1       | 150144/5.1/ALG/15 | Algeria     | 2015 | Very virulent                  |
| MT935590         | HHN79            | HHN79/FRA/19      | France      | 2019 | Very virulent<br>(Recombinant) |
| MT935589         | HHN81            | HHN81/FRA/19      | France      | 2019 | Very virulent<br>(Recombinant) |
| AF133904         | Variant E        | VarE/USA/94       | USA         | 1994 | Variant                        |
| AY462027         | 9109             | 9109/USA/03       | USA         | 2003 | Variant                        |
| HG974565         | Faragher 52/70   | F52/70/UK/70      | UK          | 1970 | Classical                      |
| AF362747         | Cu-1wt           | Cu-1wt/GER/75     | Germany     | 1975 | Classical                      |
| D00499           | STC              | STC/USA/67        | USA         | 1967 | Classical                      |
| DQ403248         | Gt               | Gt/CHN/06         | China       | 2006 | Attenuated                     |
| JQ411012         | 903/78           | 903/78/HNG/78     | Hungary     | 1978 | Attenuated                     |
| AF194428         | CEF94            | CEF94/NLD/73      | Netherlands | 1973 | Attenuated                     |
| AF321055         | JD1              | JD1/CHN/97        | China       | 1997 | Attenuated                     |
| DQ906921         | B87              | B87/CHN/06        | China       | 2006 | Attenuated                     |

|          |                    |                   |         |      |            |
|----------|--------------------|-------------------|---------|------|------------|
| AF321054 | HZ2                | HZ2/CHN/97        | China   | 1997 | Attenuated |
| KT336459 | dIBDV/UY/2014/2202 | dIBDV/2202/URY/14 | Uruguay | 2014 | Distinct   |
| U30818   | OH                 | OH/USA/82         | USA     | 1982 | Serotype 2 |

---

\*Abbreviated name followed the order of Isolate\_name/Country\_of\_origin/Collection\_year.

Table S5. Evolutionary divergence estimates between mature VP2 sequences of the study isolates and other IBDV isolates.

| Species 1        | Species 2            | Distance ( <i>d</i> ) |
|------------------|----------------------|-----------------------|
| <b>rB/USA/09</b> | <b>CAH495/USA/09</b> | <b>0.00330351</b>     |
| <b>rA/USA/09</b> | <b>CAH495/USA/09</b> | <b>0.00413566</b>     |
| <b>rA/USA/09</b> | <b>rB/USA/09</b>     | <b>0.00584559</b>     |
| rB/USA/09        | CAHFS-785/USA/09     | 0.01349633            |
| rB/USA/09        | D6948/NLD/89         | 0.01418829            |
| rA/USA/09        | CAHFS-785/USA/09     | 0.01433059            |
| rB/USA/09        | LJ-5/CHN/18          | 0.01433116            |
| rB/USA/09        | ks/ISL/90            | 0.01501753            |
| rA/USA/09        | D6948/NLD/89         | 0.01502255            |
| rA/USA/09        | LJ-5/CHN/18          | 0.01516542            |
| rA/USA/09        | ks/ISL/90            | 0.01585179            |
| rB/USA/09        | SD-2013-1/CHN/13     | 0.01606253            |
| rB/USA/09        | 89163/FRA/89         | 0.01666394            |
| rB/USA/09        | mb/ISL/08            | 0.01666549            |
| rB/USA/09        | 735/RUS/15           | 0.01666655            |
| rB/USA/09        | 711/RUS/15           | 0.01666760            |
| rB/USA/09        | 731/RUS/15           | 0.01666866            |
| rB/USA/09        | 727/RUS/15           | 0.01666971            |
| rB/USA/09        | 713/RUS/15           | 0.01666971            |
| rB/USA/09        | UK661/UK/94          | 0.01667802            |
| rA/USA/09        | SD-2013-1/CHN/13     | 0.01689679            |
| rA/USA/09        | 89163/FRA/89         | 0.01749820            |
| rA/USA/09        | mb/ISL/08            | 0.01749975            |
| rA/USA/09        | 735/RUS/15           | 0.01750081            |
| rA/USA/09        | 711/RUS/15           | 0.01750186            |
| rA/USA/09        | 731/RUS/15           | 0.01750292            |
| rA/USA/09        | 727/RUS/15           | 0.01750397            |
| rA/USA/09        | 713/RUS/15           | 0.01750397            |
| rA/USA/09        | UK661/UK/94          | 0.01751228            |
| rB/USA/09        | DD1/RUS/16           | 0.01751885            |
| rB/USA/09        | S18/CHN/18           | 0.01781649            |
| rB/USA/09        | OKYM/JPN/91          | 0.01831884            |
| rB/USA/09        | Gx/CHN/96            | 0.01833738            |
| rA/USA/09        | DD1/RUS/16           | 0.01835311            |
| rB/USA/09        | 236/POL/14           | 0.01853086            |
| rB/USA/09        | 176/POL/14           | 0.01853086            |
| rA/USA/09        | S18/CHN/18           | 0.01865075            |
| rA/USA/09        | OKYM/JPN/91          | 0.01915310            |
| rA/USA/09        | Gx/CHN/96            | 0.01917164            |
| rB/USA/09        | 75/11/POL/11         | 0.01917623            |
| rB/USA/09        | SH19/CHN/19          | 0.01923232            |
| rA/USA/09        | 236/POL/14           | 0.01936512            |
| rA/USA/09        | 176/POL/14           | 0.01936512            |
| rB/USA/09        | 72/POL/15            | 0.01941053            |
| rB/USA/09        | 20/POL/15            | 0.01941053            |
| rA/USA/09        | 75/11/POL/11         | 0.02001049            |
| rA/USA/09        | SH19/CHN/19          | 0.02006658            |
| rA/USA/09        | 72/POL/15            | 0.02024479            |
| rA/USA/09        | 20/POL/15            | 0.02024479            |
| rB/USA/09        | 02015.1/VNZ/02       | 0.02081021            |
| rB/USA/09        | 94432/FRA/94         | 0.02081943            |
| rB/USA/09        | TASIK/IDS/94         | 0.02086795            |
| rB/USA/09        | KMRG-00/TNZ/01       | 0.02095573            |

|           |                   |            |
|-----------|-------------------|------------|
| rB/USA/09 | Bug/03/POL/03     | 0.02099715 |
| rA/USA/09 | 02015.1/VNZ/02    | 0.02164447 |
| rA/USA/09 | 94432/FRA/94      | 0.02165369 |
| rA/USA/09 | TASIK/IDS/94      | 0.02170221 |
| rA/USA/09 | KMRG-00/TNZ/01    | 0.02178999 |
| rA/USA/09 | Bug/03/POL/03     | 0.02183141 |
| rB/USA/09 | KDSM-02/TNZ/04    | 0.02278079 |
| rB/USA/09 | SD-2020-1/CHN/20  | 0.02295123 |
| rA/USA/09 | KDSM-02/TNZ/04    | 0.02361505 |
| rB/USA/09 | 83/POL/11         | 0.02367185 |
| rA/USA/09 | SD-2020-1/CHN/20  | 0.02378549 |
| rB/USA/09 | 131/POL/14        | 0.02384115 |
| rB/USA/09 | BD 3/99/BNG/99    | 0.02427248 |
| rB/USA/09 | 150136/1.1/ALG/15 | 0.02431756 |
| rA/USA/09 | 83/POL/11         | 0.02450611 |
| rB/USA/09 | 98/POL/13         | 0.02455778 |
| rA/USA/09 | 131/POL/14        | 0.02467541 |
| rB/USA/09 | 96/POL/15         | 0.02472323 |
| rA/USA/09 | BD 3/99/BNG/99    | 0.02510674 |
| rA/USA/09 | 150136/1.1/ALG/15 | 0.02515182 |
| rA/USA/09 | 98/POL/13         | 0.02539204 |
| rA/USA/09 | 96/POL/15         | 0.02555749 |
| rB/USA/09 | 200/POL/15        | 0.02561007 |
| rB/USA/09 | li4129/FIN/14     | 0.02599223 |
| rB/USA/09 | 189/POL/14        | 0.02633552 |
| rA/USA/09 | 200/POL/15        | 0.02644433 |
| rB/USA/09 | 123/POL/15        | 0.02649219 |
| rA/USA/09 | li4129/FIN/14     | 0.02682649 |
| rB/USA/09 | 170W/POL/14       | 0.02685036 |
| rA/USA/09 | 189/POL/14        | 0.02716978 |
| rB/USA/09 | 216/POL/14        | 0.02722099 |
| rB/USA/09 | 115/14A/POL/14    | 0.02722099 |
| rA/USA/09 | 123/POL/15        | 0.02732645 |
| rB/USA/09 | 115/14B/POL/14    | 0.02768103 |
| rB/USA/09 | 117/14/POL/14     | 0.02768103 |
| rA/USA/09 | 170W/POL/14       | 0.02768462 |
| rA/USA/09 | 216/POL/14        | 0.02805525 |
| rA/USA/09 | 115/14A/POL/14    | 0.02805525 |
| rB/USA/09 | 217/POL/13        | 0.02814672 |
| rA/USA/09 | 115/14B/POL/14    | 0.02851529 |
| rA/USA/09 | 117/14/POL/14     | 0.02851529 |
| rA/USA/09 | 217/POL/13        | 0.02898098 |
| rB/USA/09 | KMRG-48/TNZ/02    | 0.03088346 |
| rA/USA/09 | KMRG-48/TNZ/02    | 0.03171772 |
| rB/USA/09 | NKL14/IND/14      | 0.03195883 |
| rB/USA/09 | RPM14/IND/14      | 0.03204899 |
| rB/USA/09 | 64/MOR/18         | 0.03243174 |
| rB/USA/09 | 8/MOR/17          | 0.03243279 |
| rB/USA/09 | 9-1/MOR/17        | 0.03243385 |
| rB/USA/09 | 61-7/MOR/18       | 0.03243385 |
| rA/USA/09 | NKL14/IND/14      | 0.03279309 |
| rA/USA/09 | RPM14/IND/14      | 0.03288325 |
| rA/USA/09 | 64/MOR/18         | 0.03326600 |
| rA/USA/09 | 8/MOR/17          | 0.03326705 |
| rA/USA/09 | 9-1/MOR/17        | 0.03326811 |
| rA/USA/09 | 61-7/MOR/18       | 0.03326811 |
| rB/USA/09 | IBD13HeB01/CHN/13 | 0.03402501 |

|           |                    |            |
|-----------|--------------------|------------|
| rB/USA/09 | HLJ-0504/CHN/05    | 0.03482381 |
| rA/USA/09 | IBD13HeB01/CHN/13  | 0.03485927 |
| rB/USA/09 | PLATEAU7/NG/09     | 0.03559690 |
| rB/USA/09 | THCU07/TAI/17      | 0.03560670 |
| rA/USA/09 | HLJ-0504/CHN/05    | 0.03565807 |
| rA/USA/09 | PLATEAU7/NG/09     | 0.03643116 |
| rA/USA/09 | THCU07/TAI/17      | 0.03644096 |
| rB/USA/09 | 160021/EGY/15      | 0.03687741 |
| rB/USA/09 | EDE14/IND/14       | 0.03749767 |
| rA/USA/09 | 160021/EGY/15      | 0.03771167 |
| rB/USA/09 | 160023/EGY/15      | 0.03781240 |
| rA/USA/09 | EDE14/IND/14       | 0.03833193 |
| rA/USA/09 | 160023/EGY/15      | 0.03864666 |
| rB/USA/09 | BGE15/IND/15       | 0.04027283 |
| rB/USA/09 | UVC1/NG/19         | 0.04055561 |
| rB/USA/09 | THI14/IND/14       | 0.04094352 |
| rB/USA/09 | a893/GER/21        | 0.04099119 |
| rB/USA/09 | 150124/1.1/ALG/16  | 0.04099205 |
| rB/USA/09 | b507/GER/21        | 0.04101011 |
| rA/USA/09 | BGE15/IND/15       | 0.04110709 |
| rA/USA/09 | UVC1/NG/19         | 0.04138987 |
| rA/USA/09 | THI14/IND/14       | 0.04177778 |
| rA/USA/09 | a893/GER/21        | 0.04182545 |
| rA/USA/09 | 150124/1.1/ALG/16  | 0.04182631 |
| rA/USA/09 | b507/GER/21        | 0.04184437 |
| rB/USA/09 | IBS624/MLS/17      | 0.04218095 |
| rB/USA/09 | AT6/NG/19          | 0.04234487 |
| rB/USA/09 | D3996/1/1/BEL/17   | 0.04266148 |
| rB/USA/09 | D4051/1/SWD/17     | 0.04267137 |
| rB/USA/09 | BAUCHI37/NG/12     | 0.04284206 |
| rA/USA/09 | IBS624/MLS/17      | 0.04301521 |
| rB/USA/09 | b335/NLD/21        | 0.04305677 |
| rB/USA/09 | 150133/3.2/ALG/14  | 0.04317208 |
| rA/USA/09 | AT6/NG/19          | 0.04317913 |
| rA/USA/09 | D3996/1/1/BEL/17   | 0.04349574 |
| rA/USA/09 | D4051/1/SWD/17     | 0.04350563 |
| rA/USA/09 | BAUCHI37/NG/12     | 0.04367632 |
| rA/USA/09 | b335/NLD/21        | 0.04389103 |
| rB/USA/09 | 150128/4.1/ALG/15  | 0.04399961 |
| rA/USA/09 | 150133/3.2/ALG/14  | 0.04400634 |
| rB/USA/09 | 150144/5.1/ALG/15  | 0.04401040 |
| rB/USA/09 | D4320/6/DEN/18     | 0.04434321 |
| rB/USA/09 | D4389/1/SWD/18     | 0.04455946 |
| rA/USA/09 | 150128/4.1/ALG/15  | 0.04483387 |
| rA/USA/09 | 150144/5.1/ALG/15  | 0.04484466 |
| rB/USA/09 | b524/FRA/21        | 0.04513549 |
| rB/USA/09 | b317/FRA/21        | 0.04513549 |
| rA/USA/09 | D4320/6/DEN/18     | 0.04517747 |
| rA/USA/09 | D4389/1/SWD/18     | 0.04539372 |
| rB/USA/09 | D3976/1/GER/17     | 0.04557263 |
| rB/USA/09 | BGE14/IND/15       | 0.04564943 |
| rA/USA/09 | b524/FRA/21        | 0.04596975 |
| rA/USA/09 | b317/FRA/21        | 0.04596975 |
| rB/USA/09 | UPM766/MLS/18      | 0.04611931 |
| rB/USA/09 | 276/JOR/14         | 0.04640021 |
| rA/USA/09 | D3976/1/GER/17     | 0.04640689 |
| rB/USA/09 | AC-09389/02/IRL/19 | 0.04647996 |



|           |                    |            |
|-----------|--------------------|------------|
| rA/USA/09 | BGE14/IND/15       | 0.04648369 |
| rB/USA/09 | D4628/2/CZE/19     | 0.04649274 |
| rA/USA/09 | UPM766/MLS/18      | 0.04695357 |
| rB/USA/09 | 4439001/BEL/20     | 0.04706962 |
| rB/USA/09 | b292/FRA/21        | 0.04719234 |
| rA/USA/09 | 276/JOR/14         | 0.04723447 |
| rA/USA/09 | AC-09389/02/IRL/19 | 0.04731422 |
| rA/USA/09 | D4628/2/CZE/19     | 0.04732700 |
| rB/USA/09 | 25/11/LTV/11       | 0.04774138 |
| rA/USA/09 | 4439001/BEL/20     | 0.04790388 |
| rA/USA/09 | b292/FRA/21        | 0.04802660 |
| rB/USA/09 | D3994/1/8/NLD/17   | 0.04831410 |
| rA/USA/09 | 25/11/LTV/11       | 0.04857564 |
| rA/USA/09 | D3994/1/8/NLD/17   | 0.04914836 |
| rB/USA/09 | a833/PRT/21        | 0.04926792 |
| rB/USA/09 | a749/FRA/21        | 0.04926898 |
| rB/USA/09 | a524/UK/21         | 0.04933266 |
| rA/USA/09 | a833/PRT/21        | 0.05010218 |
| rA/USA/09 | a749/FRA/21        | 0.05010324 |
| rA/USA/09 | a524/UK/21         | 0.05016692 |
| rB/USA/09 | a227/UK/21         | 0.05122511 |
| rB/USA/09 | a452/UK/21         | 0.05122590 |
| rB/USA/09 | b542/FRA/21        | 0.05135761 |
| rB/USA/09 | b289/UK/21         | 0.05152855 |
| rB/USA/09 | a664/DEN/21        | 0.05164983 |
| rA/USA/09 | a227/UK/21         | 0.05205937 |
| rA/USA/09 | a452/UK/21         | 0.05206016 |
| rB/USA/09 | 224/RUS/14         | 0.05212103 |
| rB/USA/09 | 189/RUS/14         | 0.05212209 |
| rB/USA/09 | 232/RUS/15         | 0.05212314 |
| rA/USA/09 | b542/FRA/21        | 0.05219187 |
| rB/USA/09 | UPM1056/MLS/18     | 0.05235887 |
| rA/USA/09 | b289/UK/21         | 0.05236281 |
| rB/USA/09 | 774/KAZ/16         | 0.05240150 |
| rA/USA/09 | a664/DEN/21        | 0.05248409 |
| rA/USA/09 | 224/RUS/14         | 0.05295529 |
| rA/USA/09 | 189/RUS/14         | 0.05295635 |
| rA/USA/09 | 232/RUS/15         | 0.05295740 |
| rB/USA/09 | b630/UK/21         | 0.05312964 |
| rA/USA/09 | UPM1056/MLS/18     | 0.05319313 |
| rA/USA/09 | 774/KAZ/16         | 0.05323576 |
| rB/USA/09 | 437/RUS/15         | 0.05362600 |
| rB/USA/09 | 593/RUS/15         | 0.05362706 |
| rB/USA/09 | 590/RUS/15         | 0.05362706 |
| rA/USA/09 | b630/UK/21         | 0.05396390 |
| rB/USA/09 | VCN14/IND/13       | 0.05413746 |
| rA/USA/09 | 437/RUS/15         | 0.05446026 |
| rA/USA/09 | 593/RUS/15         | 0.05446132 |
| rA/USA/09 | 590/RUS/15         | 0.05446132 |
| rA/USA/09 | VCN14/IND/13       | 0.05497172 |
| rB/USA/09 | IM/USA/67          | 0.05508038 |
| rA/USA/09 | IM/USA/67          | 0.05591464 |
| rB/USA/09 | PK33/PAK/17        | 0.05737206 |
| rB/USA/09 | 150127/0.2/ALG/15  | 0.05760873 |
| rB/USA/09 | PK2/PAK/17         | 0.05784275 |
| rB/USA/09 | 716/RUS/15         | 0.05808246 |
| rA/USA/09 | PK33/PAK/17        | 0.05820632 |

|           |                    |            |
|-----------|--------------------|------------|
| rB/USA/09 | PK28/PAK/17        | 0.05822004 |
| rB/USA/09 | IBS536/MLS/17      | 0.05823572 |
| rB/USA/09 | GXB02/CHN/20       | 0.05842466 |
| rA/USA/09 | 150127/0.2/ALG/15  | 0.05844299 |
| rB/USA/09 | PK19/PAK/17        | 0.05866349 |
| rB/USA/09 | PK12/PAK/17        | 0.05866452 |
| rA/USA/09 | PK2/PAK/17         | 0.05867701 |
| rA/USA/09 | 716/RUS/15         | 0.05891672 |
| rB/USA/09 | AC-11727/01/CZE/19 | 0.05893462 |
| rA/USA/09 | PK28/PAK/17        | 0.05905430 |
| rA/USA/09 | IBS536/MLS/17      | 0.05906998 |
| rA/USA/09 | GXB02/CHN/20       | 0.05925892 |
| rB/USA/09 | PK47/PAK/17        | 0.05948177 |
| rA/USA/09 | PK19/PAK/17        | 0.05949775 |
| rA/USA/09 | PK12/PAK/17        | 0.05949878 |
| rB/USA/09 | 641/RUS/15         | 0.05957548 |
| rB/USA/09 | 636/RUS/15         | 0.05957653 |
| rB/USA/09 | 624/RUS/15         | 0.05957653 |
| rB/USA/09 | 630/RUS/15         | 0.05957968 |
| rA/USA/09 | AC-11727/01/CZE/19 | 0.05976888 |
| rA/USA/09 | PK47/PAK/17        | 0.06031603 |
| rA/USA/09 | 641/RUS/15         | 0.06040974 |
| rA/USA/09 | 636/RUS/15         | 0.06041079 |
| rA/USA/09 | 624/RUS/15         | 0.06041079 |
| rA/USA/09 | 630/RUS/15         | 0.06041394 |
| rB/USA/09 | 717/RUS/15         | 0.06107571 |
| rB/USA/09 | F52/70/UK/70       | 0.06130507 |
| rA/USA/09 | 717/RUS/15         | 0.06190997 |
| rA/USA/09 | F52/70/UK/70       | 0.06213933 |
| rB/USA/09 | Cu-1wt/GER/75      | 0.06325230 |
| rA/USA/09 | Cu-1wt/GER/75      | 0.06408656 |
| rB/USA/09 | AC-31312/10/RUS/19 | 0.06431237 |
| rB/USA/09 | P2/GER/77          | 0.06440629 |
| rB/USA/09 | 903/78/HNG/78      | 0.06440713 |
| rB/USA/09 | D78/NLD/78         | 0.06444013 |
| rB/USA/09 | varE/USA/85        | 0.06454371 |
| rB/USA/09 | GLS/USA/87         | 0.06480432 |
| rB/USA/09 | IBDV-PSNgp/IND/14  | 0.06514260 |
| rA/USA/09 | AC-31312/10/RUS/19 | 0.06514663 |
| rB/USA/09 | HBDY-1/CHN/14      | 0.06523473 |
| rA/USA/09 | P2/GER/77          | 0.06524055 |
| rA/USA/09 | 903/78/HNG/78      | 0.06524139 |
| rA/USA/09 | D78/NLD/78         | 0.06527439 |
| rA/USA/09 | varE/USA/85        | 0.06537797 |
| rA/USA/09 | GLS/USA/87         | 0.06563858 |
| rA/USA/09 | IBDV-PSNgp/IND/14  | 0.06597686 |
| rA/USA/09 | HBDY-1/CHN/14      | 0.06606899 |
| rB/USA/09 | HeN20-7103/CHN/20  | 0.06608692 |
| rB/USA/09 | Cu-1/GER/75        | 0.06689610 |
| rB/USA/09 | ZJ2000/CHN/00      | 0.06690747 |
| rA/USA/09 | HeN20-7103/CHN/20  | 0.06692118 |
| rA/USA/09 | Cu-1/GER/75        | 0.06773036 |
| rA/USA/09 | ZJ2000/CHN/00      | 0.06774173 |
| rB/USA/09 | a799/BEL/21        | 0.06788854 |
| rA/USA/09 | a799/BEL/21        | 0.06872280 |
| rB/USA/09 | TL2004/CHN/04      | 0.06940679 |
| rB/USA/09 | IBD17JL01/CHN/19   | 0.06980854 |

|           |                    |            |
|-----------|--------------------|------------|
| rB/USA/09 | 160019/EGY/15      | 0.06980854 |
| rA/USA/09 | TL2004/CHN/04      | 0.07024105 |
| rA/USA/09 | IBD17JL01/CHN/19   | 0.07064280 |
| rA/USA/09 | 160019/EGY/15      | 0.07064280 |
| rB/USA/09 | AC-26757/01/RUS/19 | 0.07200857 |
| rA/USA/09 | AC-26757/01/RUS/19 | 0.07284283 |
| rB/USA/09 | Lukert/USA/73      | 0.07910655 |
| rA/USA/09 | Lukert/USA/73      | 0.07994081 |
| rB/USA/09 | dIBDV/2202/URY/14  | 0.08315060 |
| rB/USA/09 | 2701/12/URY/12     | 0.08328121 |
| rA/USA/09 | dIBDV/2202/URY/14  | 0.08398486 |
| rA/USA/09 | 2701/12/URY/12     | 0.08411547 |
| rB/USA/09 | 1302/16/URY/16     | 0.08707541 |
| rA/USA/09 | 1302/16/URY/16     | 0.08790967 |
| rB/USA/09 | 19P009381/FRA/19   | 0.09016158 |
| rB/USA/09 | 221201/URY/12      | 0.09039503 |
| rA/USA/09 | 19P009381/FRA/19   | 0.09099584 |
| rA/USA/09 | 221201/URY/12      | 0.09122929 |
| rB/USA/09 | P33/15/ARG/15      | 0.09396951 |
| rA/USA/09 | P33/15/ARG/15      | 0.09480377 |
| rB/USA/09 | YL160304//CHN/16   | 0.09903477 |
| rB/USA/09 | 1829/ITA/11        | 0.09955796 |
| rA/USA/09 | YL160304//CHN/16   | 0.09986903 |
| rA/USA/09 | 1829/ITA/11        | 0.10039222 |
| rB/USA/09 | SHG358/CHN/18      | 0.11115797 |
| rB/USA/09 | IBD16HeN01/CHN/16  | 0.11118143 |
| rA/USA/09 | SHG358/CHN/18      | 0.11199223 |
| rA/USA/09 | IBD16HeN01/CHN/16  | 0.11201569 |
| rB/USA/09 | 7/PRT/21           | 0.11260163 |
| rA/USA/09 | 7/PRT/21           | 0.11343589 |
| rB/USA/09 | 189/PRT/21         | 0.11466613 |
| rA/USA/09 | 189/PRT/21         | 0.11550039 |
| rB/USA/09 | SHG19/CHN/19       | 0.11631205 |
| rB/USA/09 | 76/PRT/21          | 0.11668410 |
| rB/USA/09 | 168/PRT/21         | 0.11668888 |
| rB/USA/09 | UPM1432/MLS/19     | 0.11687587 |
| rA/USA/09 | SHG19/CHN/19       | 0.11714631 |
| rA/USA/09 | 76/PRT/21          | 0.11751836 |
| rA/USA/09 | 168/PRT/21         | 0.11752314 |
| rA/USA/09 | UPM1432/MLS/19     | 0.11771013 |
| rB/USA/09 | HB-2020-1/CHN/20   | 0.11868931 |
| rA/USA/09 | HB-2020-1/CHN/20   | 0.11952357 |
| rB/USA/09 | QZ191002/CHN/19    | 0.12036620 |
| rB/USA/09 | 201/PRT/21         | 0.12080569 |
| rA/USA/09 | QZ191002/CHN/19    | 0.12120046 |
| rB/USA/09 | SHG352/CHN/18      | 0.12149726 |
| rA/USA/09 | 201/PRT/21         | 0.12163995 |
| rB/USA/09 | JS19-14701/CHN/19  | 0.12210932 |
| rA/USA/09 | SHG352/CHN/18      | 0.12233152 |
| rB/USA/09 | LN-2020-1/CHN/20   | 0.12261974 |
| rA/USA/09 | JS19-14701/CHN/19  | 0.12294358 |
| rB/USA/09 | FJ2021/CHN/21      | 0.12307487 |
| rA/USA/09 | LN-2020-1/CHN/20   | 0.12345400 |
| rA/USA/09 | FJ2021/CHN/21      | 0.12390913 |
| rB/USA/09 | LN-2020-2/CHN/20   | 0.12737745 |
| rA/USA/09 | LN-2020-2/CHN/20   | 0.12821171 |
| rB/USA/09 | ZD-2018-1/CHN/18   | 0.13130477 |

|           |                    |            |
|-----------|--------------------|------------|
| rA/USA/09 | ZD-2018-1/CHN/18   | 0.13213903 |
| rB/USA/09 | 002-73/AUS/73      | 0.14457663 |
| rA/USA/09 | 002-73/AUS/73      | 0.14541089 |
| rB/USA/09 | N1/AUS/99          | 0.15769261 |
| rA/USA/09 | N1/AUS/99          | 0.15852687 |
| rB/USA/09 | 23/82/UK/85        | 0.57582985 |
| rA/USA/09 | 23/82/UK/85        | 0.57666411 |
| rB/USA/09 | OH/USA/81          | 0.58250235 |
| rA/USA/09 | OH/USA/81          | 0.58333661 |
| rB/USA/09 | PA/00924/14/USA/15 | 0.58513160 |
| rA/USA/09 | PA/00924/14/USA/15 | 0.58596586 |

The isolate showing the closest evolutionary distance to rA or rB, is shown in bold red. The evolutionary distance between the study isolates is displayed in bold black.

Table S6. Best fitting model selection for truncated VP2 using Maximum Likelihood fits of 24 different nucleotide substitution models.

| Model           | BIC             | AICc     | lnL       | I      | G      | R    | FreqA  | FreqT  | FreqC  | FreqG  | A=>T | A=>C | A=>G | T=>A | T=>C | T=>G | C=>A | C=>T | C=>G | G=>A | G=>T | G=>C |
|-----------------|-----------------|----------|-----------|--------|--------|------|--------|--------|--------|--------|------|------|------|------|------|------|------|------|------|------|------|------|
| <b>GTR+G+I*</b> | <b>28923.45</b> | 25283.71 | -12282.16 | 0.3973 | 0.5508 | 3.54 | 0.2734 | 0.2080 | 0.2679 | 0.2506 | 0.03 | 0.04 | 0.14 | 0.05 | 0.28 | 0.02 | 0.04 | 0.22 | 0.01 | 0.15 | 0.02 | 0.01 |
| GTR+G           | 28963.15        | 25333.54 | -12308.08 | n/a    | 0.2481 | 3.51 | 0.2734 | 0.2080 | 0.2679 | 0.2506 | 0.04 | 0.04 | 0.14 | 0.05 | 0.28 | 0.02 | 0.04 | 0.22 | 0.01 | 0.15 | 0.02 | 0.01 |
| TN93+G+I        | 29011.89        | 25402.55 | -12344.60 | 0.3964 | 0.5403 | 3.53 | 0.2734 | 0.2080 | 0.2679 | 0.2506 | 0.02 | 0.03 | 0.14 | 0.03 | 0.28 | 0.03 | 0.03 | 0.22 | 0.03 | 0.15 | 0.02 | 0.03 |
| K2+G+I          | 29048.08        | 25479.28 | -12386.98 | 0.4013 | 0.5354 | 3.44 | 0.25   | 0.25   | 0.25   | 0.25   | 0.03 | 0.03 | 0.19 | 0.03 | 0.19 | 0.03 | 0.03 | 0.19 | 0.03 | 0.19 | 0.03 | 0.03 |
| TN93+G          | 29054.40        | 25455.19 | -12371.92 | n/a    | 0.2472 | 3.51 | 0.2734 | 0.2080 | 0.2679 | 0.2506 | 0.02 | 0.03 | 0.14 | 0.03 | 0.28 | 0.03 | 0.03 | 0.22 | 0.03 | 0.15 | 0.02 | 0.03 |
| HKY+G+I         | 29071.64        | 25472.44 | -12380.54 | 0.4055 | 0.5401 | 3.53 | 0.2734 | 0.2080 | 0.2679 | 0.2506 | 0.02 | 0.03 | 0.2  | 0.03 | 0.21 | 0.03 | 0.03 | 0.16 | 0.03 | 0.21 | 0.02 | 0.03 |
| T92+G+I         | 29073.99        | 25495.05 | -12393.86 | 0.4024 | 0.5391 | 3.43 | 0.2407 | 0.2407 | 0.2593 | 0.2593 | 0.03 | 0.03 | 0.2  | 0.03 | 0.2  | 0.03 | 0.03 | 0.19 | 0.03 | 0.19 | 0.03 | 0.03 |
| K2+G            | 29094.98        | 25536.31 | -12416.50 | n/a    | 0.2451 | 3.43 | 0.25   | 0.25   | 0.25   | 0.25   | 0.03 | 0.03 | 0.19 | 0.03 | 0.19 | 0.03 | 0.03 | 0.19 | 0.03 | 0.19 | 0.03 | 0.03 |
| HKY+G           | 29116.45        | 25527.38 | -12409.02 | n/a    | 0.2413 | 3.52 | 0.2734 | 0.2080 | 0.2679 | 0.2506 | 0.02 | 0.03 | 0.2  | 0.03 | 0.21 | 0.03 | 0.03 | 0.16 | 0.03 | 0.21 | 0.02 | 0.03 |
| T92+G           | 29119.47        | 25550.67 | -12422.67 | n/a    | 0.2448 | 3.42 | 0.2407 | 0.2407 | 0.2593 | 0.2593 | 0.03 | 0.03 | 0.2  | 0.03 | 0.2  | 0.03 | 0.03 | 0.19 | 0.03 | 0.19 | 0.03 | 0.03 |
| GTR+I           | 29566.50        | 25936.89 | -12609.76 | 0.5896 | n/a    | 3.29 | 0.2734 | 0.2080 | 0.2679 | 0.2506 | 0.04 | 0.04 | 0.14 | 0.05 | 0.27 | 0.03 | 0.04 | 0.21 | 0.01 | 0.15 | 0.02 | 0.01 |
| TN93+I          | 29659.32        | 26060.11 | -12674.38 | 0.5903 | n/a    | 3.25 | 0.2734 | 0.2080 | 0.2679 | 0.2506 | 0.02 | 0.03 | 0.14 | 0.03 | 0.27 | 0.03 | 0.03 | 0.21 | 0.03 | 0.15 | 0.02 | 0.03 |
| K2+I            | 29715.44        | 26156.77 | -12726.73 | 0.5912 | n/a    | 3.19 | 0.25   | 0.25   | 0.25   | 0.25   | 0.03 | 0.03 | 0.19 | 0.03 | 0.19 | 0.03 | 0.03 | 0.19 | 0.03 | 0.19 | 0.03 | 0.03 |
| T92+I           | 29739.05        | 26170.25 | -12732.46 | 0.5912 | n/a    | 3.19 | 0.2407 | 0.2407 | 0.2593 | 0.2593 | 0.03 | 0.03 | 0.2  | 0.03 | 0.2  | 0.03 | 0.03 | 0.18 | 0.03 | 0.18 | 0.03 | 0.03 |
| HKY+I           | 29744.14        | 26155.07 | -12722.86 | 0.5929 | n/a    | 3.24 | 0.2734 | 0.2080 | 0.2679 | 0.2506 | 0.02 | 0.03 | 0.19 | 0.03 | 0.2  | 0.03 | 0.03 | 0.16 | 0.03 | 0.21 | 0.02 | 0.03 |
| JC+G+I          | 30508.06        | 26949.39 | -13123.04 | 0.4016 | 0.5693 | 0.5  | 0.25   | 0.25   | 0.25   | 0.25   | 0.08 | 0.08 | 0.08 | 0.08 | 0.08 | 0.08 | 0.08 | 0.08 | 0.08 | 0.08 | 0.08 | 0.08 |
| JC+G            | 30556.11        | 27007.57 | -13153.13 | n/a    | 0.2592 | 0.5  | 0.25   | 0.25   | 0.25   | 0.25   | 0.08 | 0.08 | 0.08 | 0.08 | 0.08 | 0.08 | 0.08 | 0.08 | 0.08 | 0.08 | 0.08 | 0.08 |
| JC+I            | 31129.68        | 27581.15 | -13439.92 | 0.5921 | n/a    | 0.5  | 0.25   | 0.25   | 0.25   | 0.25   | 0.08 | 0.08 | 0.08 | 0.08 | 0.08 | 0.08 | 0.08 | 0.08 | 0.08 | 0.08 | 0.08 | 0.08 |
| GTR             | 31555.52        | 27936.04 | -13610.34 | n/a    | n/a    | 2.35 | 0.2734 | 0.2080 | 0.2679 | 0.2506 | 0.04 | 0.05 | 0.14 | 0.05 | 0.23 | 0.02 | 0.05 | 0.18 | 0.03 | 0.15 | 0.02 | 0.03 |
| TN93            | 31581.39        | 27992.32 | -13641.49 | n/a    | n/a    | 2.94 | 0.2734 | 0.2080 | 0.2679 | 0.2506 | 0.03 | 0.03 | 0.14 | 0.03 | 0.26 | 0.03 | 0.03 | 0.2  | 0.03 | 0.15 | 0.03 | 0.03 |
| K2              | 31606.49        | 28057.96 | -13678.32 | n/a    | n/a    | 2.93 | 0.25   | 0.25   | 0.25   | 0.25   | 0.03 | 0.03 | 0.19 | 0.03 | 0.19 | 0.03 | 0.03 | 0.19 | 0.03 | 0.19 | 0.03 | 0.03 |
| T92             | 31627.48        | 28068.82 | -13682.75 | n/a    | n/a    | 2.93 | 0.2407 | 0.2407 | 0.2593 | 0.2593 | 0.03 | 0.03 | 0.19 | 0.03 | 0.19 | 0.03 | 0.03 | 0.18 | 0.03 | 0.18 | 0.03 | 0.03 |
| HKY             | 31667.30        | 28088.37 | -13690.52 | n/a    | n/a    | 2.93 | 0.2734 | 0.2080 | 0.2679 | 0.2506 | 0.03 | 0.03 | 0.19 | 0.03 | 0.2  | 0.03 | 0.03 | 0.16 | 0.03 | 0.2  | 0.03 | 0.03 |
| JC              | 32965.84        | 29427.44 | -14364.07 | n/a    | n/a    | 0.5  | 0.25   | 0.25   | 0.25   | 0.25   | 0.08 | 0.08 | 0.08 | 0.08 | 0.08 | 0.08 | 0.08 | 0.08 | 0.08 | 0.08 | 0.08 | 0.08 |

\*Model with the lowest BIC scores (Bayesian Information Criterion) is considered to best describe the substitution pattern (shown in bold red). For each model. A total of 1359 positions existed in the final dataset. Abbreviations: K2: Kimura 2-parameter; TR: General Time Reversible; HKY: Hasegawa-Kishino-Yano; TN93: Tamura-Nei; T92: Tamura 3-parameter; JC: Jukes-Cantor.

Table S7. Best fitting model selection for VP1 using Maximum Likelihood fits of 24 different nucleotide substitution models.

| Model           | BIC             | AICc     | lnL       | I     | G     | R     | FreqA | FreqT | FreqC | FreqG | A=>T | A=>C | A=>G | T=>A | T=>C | T=>G | C=>A | C=>T | C=>G | G=>A | G=>T | G=>C |
|-----------------|-----------------|----------|-----------|-------|-------|-------|-------|-------|-------|-------|------|------|------|------|------|------|------|------|------|------|------|------|
| <b>GTR+G+I*</b> | <b>51297.41</b> | 47510.32 | -23399.76 | 0.367 | 0.421 | 3.695 | 0.286 | 0.193 | 0.268 | 0.253 | 0.03 | 0.03 | 0.15 | 0.05 | 0.27 | 0.02 | 0.03 | 0.2  | 0.02 | 0.17 | 0.01 | 0.02 |
| GTR+G           | 51337.91        | 47561.48 | -23426.35 | n/a   | 0.200 | 3.586 | 0.286 | 0.193 | 0.268 | 0.253 | 0.03 | 0.03 | 0.15 | 0.05 | 0.27 | 0.02 | 0.03 | 0.19 | 0.02 | 0.17 | 0.01 | 0.02 |
| TN93+G+I        | 51378.22        | 47623.12 | -23459.17 | 0.428 | 0.516 | 4.352 | 0.286 | 0.193 | 0.268 | 0.253 | 0.02 | 0.02 | 0.14 | 0.03 | 0.3  | 0.02 | 0.03 | 0.22 | 0.02 | 0.16 | 0.02 | 0.02 |
| TN93+G          | 51401.70        | 47657.27 | -23477.25 | n/a   | 0.200 | 4.295 | 0.286 | 0.193 | 0.268 | 0.253 | 0.02 | 0.02 | 0.15 | 0.03 | 0.29 | 0.02 | 0.03 | 0.21 | 0.02 | 0.17 | 0.02 | 0.02 |
| K2+G+I          | 51510.42        | 47797.98 | -23550.61 | 0.417 | 0.488 | 4.226 | 0.25  | 0.25  | 0.25  | 0.25  | 0.02 | 0.02 | 0.2  | 0.02 | 0.2  | 0.02 | 0.02 | 0.2  | 0.02 | 0.2  | 0.02 | 0.02 |
| HKY+G+I         | 51523.14        | 47778.72 | -23537.97 | 0.439 | 0.521 | 4.455 | 0.286 | 0.193 | 0.268 | 0.253 | 0.02 | 0.02 | 0.21 | 0.03 | 0.22 | 0.02 | 0.03 | 0.16 | 0.02 | 0.23 | 0.02 | 0.02 |
| T92+G+I         | 51542.40        | 47819.30 | -23560.27 | 0.409 | 0.475 | 4.235 | 0.239 | 0.239 | 0.261 | 0.261 | 0.02 | 0.02 | 0.21 | 0.02 | 0.21 | 0.02 | 0.02 | 0.19 | 0.02 | 0.19 | 0.02 | 0.02 |
| K2+G            | 51542.60        | 47840.84 | -23573.04 | n/a   | 0.200 | 4.187 | 0.25  | 0.25  | 0.25  | 0.25  | 0.02 | 0.02 | 0.2  | 0.02 | 0.2  | 0.02 | 0.02 | 0.2  | 0.02 | 0.2  | 0.02 | 0.02 |
| HKY+G           | 51549.76        | 47816.00 | -23557.61 | n/a   | 0.195 | 4.399 | 0.286 | 0.193 | 0.268 | 0.253 | 0.02 | 0.02 | 0.21 | 0.03 | 0.22 | 0.02 | 0.03 | 0.16 | 0.02 | 0.23 | 0.02 | 0.02 |
| T92+G           | 51567.24        | 47854.81 | -23579.02 | n/a   | 0.199 | 4.199 | 0.239 | 0.239 | 0.261 | 0.261 | 0.02 | 0.03 | 0.21 | 0.02 | 0.21 | 0.03 | 0.02 | 0.19 | 0.03 | 0.19 | 0.02 | 0.03 |
| GTR+I           | 52411.25        | 48634.82 | -23963.01 | 0.632 | n/a   | 3.358 | 0.286 | 0.193 | 0.268 | 0.253 | 0.03 | 0.03 | 0.16 | 0.05 | 0.25 | 0.02 | 0.03 | 0.18 | 0.02 | 0.18 | 0.02 | 0.02 |
| TN93+I          | 52456.35        | 48711.92 | -24004.57 | 0.630 | n/a   | 4.035 | 0.286 | 0.193 | 0.268 | 0.253 | 0.02 | 0.03 | 0.16 | 0.03 | 0.27 | 0.02 | 0.03 | 0.2  | 0.02 | 0.18 | 0.02 | 0.03 |
| K2+I            | 52562.33        | 48860.56 | -24082.90 | 0.633 | n/a   | 3.979 | 0.25  | 0.25  | 0.25  | 0.25  | 0.03 | 0.03 | 0.2  | 0.03 | 0.2  | 0.03 | 0.03 | 0.2  | 0.03 | 0.2  | 0.03 | 0.03 |
| T92+I           | 52597.08        | 48884.65 | -24093.94 | 0.632 | n/a   | 3.985 | 0.239 | 0.239 | 0.261 | 0.261 | 0.02 | 0.03 | 0.21 | 0.02 | 0.21 | 0.03 | 0.02 | 0.19 | 0.03 | 0.19 | 0.02 | 0.03 |
| HKY+I           | 52609.95        | 48876.19 | -24087.71 | 0.633 | n/a   | 4.114 | 0.286 | 0.193 | 0.268 | 0.253 | 0.02 | 0.03 | 0.2  | 0.03 | 0.22 | 0.02 | 0.03 | 0.16 | 0.02 | 0.23 | 0.02 | 0.03 |
| JC+G+I          | 54995.22        | 51293.45 | -25299.35 | 0.370 | 0.437 | 0.5   | 0.25  | 0.25  | 0.25  | 0.25  | 0.08 | 0.08 | 0.08 | 0.08 | 0.08 | 0.08 | 0.08 | 0.08 | 0.08 | 0.08 | 0.08 | 0.08 |
| JC+G            | 55011.40        | 51320.30 | -25313.77 | n/a   | 0.205 | 0.5   | 0.25  | 0.25  | 0.25  | 0.25  | 0.08 | 0.08 | 0.08 | 0.08 | 0.08 | 0.08 | 0.08 | 0.08 | 0.08 | 0.08 | 0.08 | 0.08 |
| JC+I            | 55964.45        | 52273.35 | -25790.30 | 0.632 | n/a   | 0.5   | 0.25  | 0.25  | 0.25  | 0.25  | 0.08 | 0.08 | 0.08 | 0.08 | 0.08 | 0.08 | 0.08 | 0.08 | 0.08 | 0.08 | 0.08 | 0.08 |
| GTR             | 57125.57        | 53359.81 | -26326.51 | n/a   | n/a   | 3.082 | 0.286 | 0.193 | 0.268 | 0.253 | 0.03 | 0.04 | 0.14 | 0.05 | 0.27 | 0.02 | 0.04 | 0.19 | 0.02 | 0.16 | 0.01 | 0.03 |
| TN93            | 57179.86        | 53446.10 | -26372.66 | n/a   | n/a   | 3.771 | 0.286 | 0.193 | 0.268 | 0.253 | 0.02 | 0.03 | 0.14 | 0.03 | 0.29 | 0.03 | 0.03 | 0.21 | 0.03 | 0.16 | 0.02 | 0.03 |
| K2              | 57310.05        | 53618.95 | -26463.10 | n/a   | n/a   | 3.754 | 0.25  | 0.25  | 0.25  | 0.25  | 0.03 | 0.03 | 0.2  | 0.03 | 0.2  | 0.03 | 0.03 | 0.2  | 0.03 | 0.2  | 0.03 | 0.03 |
| T92             | 57349.06        | 53647.29 | -26476.27 | n/a   | n/a   | 3.756 | 0.239 | 0.239 | 0.261 | 0.261 | 0.03 | 0.03 | 0.21 | 0.03 | 0.21 | 0.03 | 0.03 | 0.19 | 0.03 | 0.19 | 0.03 | 0.03 |
| HKY             | 57477.23        | 53754.13 | -26527.68 | n/a   | n/a   | 3.759 | 0.286 | 0.193 | 0.268 | 0.253 | 0.02 | 0.03 | 0.2  | 0.03 | 0.21 | 0.03 | 0.03 | 0.15 | 0.03 | 0.23 | 0.02 | 0.03 |
| JC              | 60622.60        | 56942.16 | -28125.71 | n/a   | n/a   | 0.5   | 0.25  | 0.25  | 0.25  | 0.25  | 0.08 | 0.08 | 0.08 | 0.08 | 0.08 | 0.08 | 0.08 | 0.08 | 0.08 | 0.08 | 0.08 | 0.08 |

\*Model with the lowest BIC scores (Bayesian Information Criterion) is to best describing the substitution pattern (shown in bold red). For each model. A total of 2640 positions existed in the final dataset. Abbreviations: K2: Kimura 2-parameter; TR: General Time Reversible; HKY: Hasegawa-Kishino-Yano; TN93: Tamura-Nei; T92: Tamura 3-parameter; JC: Jukes-Cantor.

Table S8. Accession numbers of sequences used for reassortment analysis of Californian isolates.

| #  | Accession No.<br>(VP1) | Accession No.<br>(VP2) | Isolate              | Country     | Collection<br>year | Abbreviated name  |
|----|------------------------|------------------------|----------------------|-------------|--------------------|-------------------|
| 1  | AY029165               | AY029166               | Irwin Moulthrop (IM) | USA         | 1967               | IM/USA/67         |
| 2  | HG974566               | HG974565               | Faragher 52/70       | UK          | 1970               | F52/70/UK/70      |
| 3  | AY918947               | AY918948               | Lukert               | USA         | 1973               | Lukert/USA/73     |
| 4  | M19336                 | X03993                 | 002-73               | Australia   | 1973               | 002-73/AUS/73     |
| 5  | AF362748               | AF362747               | Cu-1wt               | Germany     | 1975               | Cu-1wt/GER/75     |
| 6  | X84035                 | X84034                 | P2                   | Germany     | 1977               | P2/GER/77         |
| 7  | JQ411013               | JQ411012               | 903/78               | Hungary     | 1978               | 903/78/HNG/78     |
| 8  | AF499930               | AF499929               | D78                  | Netherlands | 1978               | D78/NLD/78        |
| 9  | U30819                 | U30818                 | OH                   | USA         | 1981               | OH/USA/81         |
| 10 | AF362774               | AF362773               | 23/82                | UK          | 1985               | 23/82/UK/85       |
| 11 | AF133905               | AF133904               | variant E            | USA         | 1985               | varE/USA/85       |
| 12 | AY368654               | AY368653               | GLS                  | USA         | 1987               | GLS/USA/87        |
| 13 | HG974564               | HG974563               | 89163                | France      | 1989               | 89163/FRA/89      |
| 14 | AF240687               | AF240686               | D6948                | Netherlands | 1989               | D6948/NLD/89      |
| 15 | DQ927043               | DQ927042               | ks                   | Israel      | 1990               | ks/ISL/90         |
| 16 | D49707                 | D49706                 | OKYM                 | Japan       | 1991               | OKYM/JPN/91       |
| 17 | AM167551               | AM167550               | 94432                | France      | 1994               | 94432/FRA/94      |
| 18 | AF322445               | AF322444               | TASIK                | Indonesia   | 1994               | TASIK/IDS/94      |
| 19 | NC_004179              | NC_004178              | UK661                | UK          | 1994               | UK661/UK/94       |
| 20 | AY705393               | AY444873               | Gx                   | China       | 1996               | Gx/CHN/96         |
| 21 | AF362770               | AF362776               | BD_3/99              | Bangladesh  | 1999               | BD_3/99/BNG/99    |
| 22 | DQ166818               | AF321056               | ZJ2000               | China       | 2000               | ZJ2000/CHN/00     |
| 23 | AB368971               | AB368970               | KMRG-48              | Tanzania    | 2002               | KMRG-48/TNZ/02    |
| 24 | AJ880090               | AJ879932               | 02015.1              | Venezuela   | 2002               | 02015.1/VNZ/02    |
| 25 | MT629833               | MT629830               | Bug/03               | Poland      | 2003               | Bug/03/POL/03     |
| 26 | DQ118374               | DQ088175               | TL2004               | China       | 2004               | TL2004/CHN/04     |
| 27 | GQ451331               | GQ451330               | HLJ-0504             | China       | 2005               | HLJ-0504/CHN/05   |
| 28 | JF907704               | JF907703               | CAH495               | USA         | 2009               | CAH495/USA/09     |
| 29 | JF907705               | JF907702               | CAHFS-785            | USA         | 2009               | CAHFS-785/USA/09  |
| 30 | MT629835               | MT629832               | 75/11                | Poland      | 2011               | 75/11/POL/11      |
| 31 | KX520665               | KY930929               | 1829                 | Italy       | 2011               | 1829/ITA/11       |
| 32 | OP225971               | OP225970               | 25/11                | Latvia      | 2011               | 25/11/LTV/11      |
| 33 | MN313619               | MN313613               | 221201               | Uruguay     | 2012               | 221201/URY/12     |
| 34 | MN313620               | MN313614               | 2701/12              | Uruguay     | 2012               | 2701/12/URY/12    |
| 35 | MN485881               | MN485880               | SD-2013-1            | China       | 2013               | SD-2013-1/CHN/13  |
| 36 | KU578101               | KU578100               | VCN14                | India       | 2013               | VCN14/IND/13      |
| 37 | KP676468               | KP676467               | IBD13HeB01           | China       | 2013               | IBD13HeB01/CHN/13 |
| 38 | MT629834               | MT629831               | 117/14               | Poland      | 2014               | 117/14/POL/14     |
| 39 | MK501732               | MK501731               | IBDV-PSNgp           | India       | 2014               | IBDV-PSNgp/IND/14 |
| 40 | MG739299               | MG739298               | li4129               | Finland     | 2014               | li4129/FIN/14     |
| 41 | MF969112               | MF969111               | 150133/3.2           | Algeria     | 2014               | 150133/3.2/ALG/14 |



|    |          |          |                         |           |      |                    |
|----|----------|----------|-------------------------|-----------|------|--------------------|
| 42 | KX592159 | KX592158 | HBDY-1                  | China     | 2014 | HBDY-1/CHN/14      |
| 43 | KU578103 | KU578102 | RPM14                   | India     | 2014 | RPM14/IND/14       |
| 44 | KU578105 | KU578104 | THI14                   | India     | 2014 | THI14/IND/14       |
| 45 | KU558698 | KU558697 | EDE14                   | India     | 2014 | EDE14/IND/14       |
| 46 | KU578099 | KU578098 | NKL14                   | India     | 2014 | NKL14/IND/14       |
| 47 | KT884453 | KT884452 | BGE14                   | India     | 2014 | BGE14/IND/15       |
| 48 | KT336458 | KT336459 | dIBDV/UY/2014/2202      | Uruguay   | 2014 | dIBDV/2202/URY/14  |
| 49 | MN313616 | MN313610 | P33/15                  | Argentina | 2015 | P33/15/ARG/15      |
| 50 | KY597860 | KY610530 | 160021                  | Egypt     | 2015 | 160021/EGY/15      |
| 51 | KY597861 | KY610531 | 160023                  | Egypt     | 2015 | 160023/EGY/15      |
| 52 | KY597863 | KY610529 | 160019                  | Egypt     | 2015 | 160019/EGY/15      |
| 53 | MF969106 | MF969105 | 150124/1.1              | Algeria   | 2016 | 150124/1.1/ALG/16  |
| 54 | MF969108 | MF969107 | 150127/0.2              | Algeria   | 2015 | 150127/0.2/ALG/15  |
| 55 | MF969110 | MF969109 | 150128/4.1              | Algeria   | 2015 | 150128/4.1/ALG/15  |
| 56 | MF969114 | MF969113 | 150136/1.1              | Algeria   | 2015 | 150136/1.1/ALG/15  |
| 57 | MF969116 | MF969115 | 150144/5.1              | Algeria   | 2015 | 150144/5.1/ALG/15  |
| 58 | -        | KP642112 | IBDV/Turkey/PA/00924/14 | USA       | 2015 | PA/00924/14/USA/15 |
| 59 | KT870149 | KT870148 | BGE15                   | India     | 2015 | BGE15/IND/15       |
| 60 | MZ066616 | MZ066614 | YL160304                | China     | 2016 | YL160304//CHN/16   |
| 61 | MT179711 | MT179710 | IBD16HeN01              | China     | 2016 | IBD16HeN01/CHN/16  |
| 62 | MN313621 | MN313615 | 1/chicken/URY/1302/16   | Uruguay   | 2016 | 1302/16/URY/16     |
| 63 | MH644847 | MH644846 | DD1                     | Russia    | 2016 | DD1/RUS/16         |
| 64 | MT505344 | MT505339 | IBS536                  | Malaysia  | 2017 | IBS536/MLS/17      |
| 65 | MT505345 | MT505340 | IBS624                  | Malaysia  | 2017 | IBS624/MLS/17      |
| 66 | MN786769 | MN786767 | D3976/1                 | Germany   | 2017 | D3976/1/GER/17     |
| 67 | MK919703 | MK800149 | PK12                    | Pakistan  | 2017 | PK12/PAK/17        |
| 68 | MK919704 | MK800150 | PK19                    | Pakistan  | 2017 | PK19/PAK/17        |
| 69 | MK919705 | MK800151 | PK28                    | Pakistan  | 2017 | PK28/PAK/17        |
| 70 | MK919706 | MK800152 | PK33                    | Pakistan  | 2017 | PK33/PAK/17        |
| 71 | MK919707 | MK800153 | PK47                    | Pakistan  | 2017 | PK47/PAK/17        |
| 72 | MK580166 | MK580161 | 61-7                    | Morocco   | 2018 | 61-7/MOR/18        |
| 73 | MF996500 | MF996499 | PK2                     | Pakistan  | 2017 | PK2/PAK/17         |
| 74 | -        | MZ614612 | THCU07                  | Thailand  | 2017 | THCU07/TAI/17      |
| 75 | MT505346 | MT505341 | UPM766                  | Malaysia  | 2018 | UPM766/MLS/18      |
| 76 | MT505347 | MT505342 | UPM1056                 | Malaysia  | 2018 | UPM1056/MLS/18     |
| 77 | MN786770 | MN786768 | D4320/6                 | Denmark   | 2018 | D4320/6/DEN/18     |
| 78 | MT446362 | MW030633 | LJ-5                    | China     | 2018 | LJ-5/CHN/18        |
| 79 | MT179723 | MT179721 | SHG358                  | China     | 2018 | SHG358/CHN/18      |
| 80 | MT179722 | MT179720 | SHG352                  | China     | 2018 | SHG352/CHN/18      |
| 81 | MN485883 | MN485882 | ZD-2018-1               | China     | 2018 | ZD-2018-1/CHN/18   |
| 82 | MK580164 | MK580160 | 9-1                     | Morocco   | 2017 | 9-1/MOR/17         |
| 83 | MK580165 | MK580162 | 8                       | Morocco   | 2017 | 8/MOR/17           |
| 84 | MK580167 | MK580163 | 64                      | Morocco   | 2018 | 64/MOR/18          |
| 85 | MK472712 | MK472711 | S18                     | China     | 2018 | S18/CHN/18         |

|     |          |          |            |             |      |                   |
|-----|----------|----------|------------|-------------|------|-------------------|
| 86  | OK043827 | OK043826 | 19P009381  | France      | 2019 | 19P009381/FRA/19  |
| 87  | MZ066615 | MZ066613 | QZ191002   | China       | 2019 | QZ191002/CHN/19   |
| 88  | MW700333 | MW700332 | JS19-14701 | China       | 2019 | JS19-14701/CHN/19 |
| 89  | MT505348 | MT505343 | UPM1432    | Malaysia    | 2019 | UPM1432/MLS/19    |
| 90  | MT066170 | MT066169 | SH19       | China       | 2019 | SH19/CHN/19       |
| 91  | MN604242 | MN604241 | IBD17JL01  | China       | 2019 | IBD17JL01/CHN/19  |
| 92  | MN393077 | MN393076 | SHG19      | China       | 2019 | SHG19/CHN/19      |
| 93  | MZ740265 | MZ740264 | GXB02      | China       | 2020 | GXB02/CHN/20      |
| 94  | MW682878 | MW682877 | HeN20-7103 | China       | 2020 | HeN20-7103/CHN/20 |
| 95  | MZ367374 | MZ367373 | 4439001    | Belgium     | 2020 | 4439001/BEL/20    |
| 96  | MW767378 | MW767374 | LN-2020-1  | China       | 2020 | LN-2020-1/CHN/20  |
| 97  | MW767379 | MW767375 | LN-2020-2  | China       | 2020 | LN-2020-2/CHN/20  |
| 98  | MW767380 | MW767376 | SD-2020-1  | China       | 2020 | SD-2020-1/CHN/20  |
| 99  | MW767377 | MW767998 | HB-2020-1  | China       | 2020 | HB-2020-1/CHN/20  |
| 100 | MZ593903 | MZ593902 | FJ2021     | China       | 2021 | FJ2021/CHN/21     |
| 101 | DQ927041 | DQ927040 | mb         | Israel      | 2008 | mb/ISL/08         |
| 102 | AF362775 | D00867   | Cu-1       | Germany     | 1975 | Cu-1/GER/75       |
| 103 | KX759557 | KX759603 | 83         | Poland      | 2011 | 83/POL/11         |
| 104 | KX759558 | KX759604 | 98         | Poland      | 2013 | 98/POL/13         |
| 105 | KX759559 | KX759610 | 217        | Poland      | 2013 | 217/POL/13        |
| 106 | KX759560 | KX759605 | 115/14A    | Poland      | 2014 | 115/14A/POL/14    |
| 107 | KX759561 | KX759606 | 115/14B    | Poland      | 2014 | 115/14B/POL/14    |
| 108 | KX759563 | KX759608 | 131        | Poland      | 2014 | 131/POL/14        |
| 109 | KX759564 | KX759609 | 170W       | Poland      | 2014 | 170W/POL/14       |
| 110 | KX759550 | KX759596 | 176        | Poland      | 2014 | 176/POL/14        |
| 111 | KX759565 | KX759611 | 189        | Poland      | 2014 | 189/POL/14        |
| 112 | KX759566 | KX759612 | 216        | Poland      | 2014 | 216/POL/14        |
| 113 | KX759551 | KX759597 | 236        | Poland      | 2014 | 236/POL/14        |
| 114 | KX759552 | KX759598 | 20         | Poland      | 2015 | 20/POL/15         |
| 115 | KX759553 | KX759599 | 72         | Poland      | 2015 | 72/POL/15         |
| 116 | KX759567 | KX759613 | 96         | Poland      | 2015 | 96/POL/15         |
| 117 | KX759568 | KX759614 | 123        | Poland      | 2015 | 123/POL/15        |
| 118 | KX759569 | KX759615 | 200        | Poland      | 2015 | 200/POL/15        |
| 119 | ON152535 | ON152424 | a799       | Belgium     | 2021 | a799/BEL/21       |
| 120 | ON152537 | ON152426 | a664       | Denmark     | 2021 | a664/DEN/21       |
| 121 | ON152586 | ON152475 | b335       | Netherlands | 2021 | b335/NLD/21       |
| 122 | ON152592 | ON152481 | a833       | Portugal    | 2021 | a833/PRT/21       |
| 123 | ON152570 | ON152459 | a893       | Germany     | 2021 | a893/GER/21       |
| 124 | ON152573 | ON152462 | b507       | Germany     | 2021 | b507/GER/21       |
| 125 | ON152538 | ON152427 | a749       | France      | 2021 | a749/FRA/21       |
| 126 | ON152551 | ON152440 | b292       | France      | 2021 | b292/FRA/21       |
| 127 | ON152556 | ON152445 | b317       | France      | 2021 | b317/FRA/21       |
| 128 | ON152562 | ON152451 | b524       | France      | 2021 | b524/FRA/21       |
| 129 | ON152564 | ON152453 | b542       | France      | 2021 | b542/FRA/21       |

|     |          |          |                       |                |      |                    |
|-----|----------|----------|-----------------------|----------------|------|--------------------|
| 130 | ON152608 | ON152497 | a227                  | UK             | 2021 | a227/UK/21         |
| 131 | ON152619 | ON152508 | a452                  | UK             | 2021 | a452/UK/21         |
| 132 | ON152630 | ON152519 | a524                  | UK             | 2021 | a524/UK/21         |
| 133 | ON152638 | ON152527 | b289                  | UK             | 2021 | b289/UK/21         |
| 134 | ON152642 | ON152531 | b630                  | UK             | 2021 | b630/UK/21         |
| 135 | ON152575 | -        | 1/chicken/ITA/a056/21 | Italy          | 2021 | a059/ITA/21        |
| 136 | ON152577 | -        | 1/chicken/ITA/a186/21 | Italy          | 2021 | a186/ITA/21        |
| 137 | ON152576 | -        | 1/chicken/ITA/a163/21 | Italy          | 2021 | a163/ITA/21        |
| 138 | ON152578 | -        | 1/chicken/ITA/a191/21 | Italy          | 2021 | a191/ITA/21        |
| 139 | ON152579 | -        | 1/chicken/ITA/a217/21 | Italy          | 2021 | a217/ITA/21        |
| 140 | ON152580 | -        | 1/chicken/ITA/a393/21 | Italy          | 2021 | a393/ITA/21        |
| 141 | MT050426 | MT050435 | AC-09389/02           | Irleand        | 2019 | AC-09389/02/IRL/19 |
| 142 | MT050427 | MT050436 | AC-11727/01           | Czech Republic | 2019 | AC-11727/01/CZE/19 |
| 143 | MT050431 | MT050440 | AC-26757/01           | Russia         | 2019 | AC-26757/01/RUS/19 |
| 144 | MT050433 | MT050442 | AC-31312/10           | Russia         | 2019 | AC-31312/10/RUS/19 |
| 145 | AJ878641 | AF381005 | N1                    | Austraila      | 1999 | N1/AUS/99          |
| 146 | AB368956 | AB200975 | KMRG-00               | Tanzania       | 2001 | KMRG-00/TNZ/01     |
| 147 | AB368955 | AB200976 | KDSM-02               | Tanzania       | 2004 | KDSM-02/TNZ/04     |
| 148 | MF142463 | MF142509 | 189                   | Russia         | 2014 | 189/RUS/14         |
| 149 | MF142464 | MF142514 | 224                   | Russia         | 2014 | 224/RUS/14         |
| 150 | MF142465 | MF142515 | 232                   | Russia         | 2015 | 232/RUS/15         |
| 151 | MF142466 | MF142517 | 276                   | Jordan         | 2014 | 276/JOR/14         |
| 152 | MF142473 | MF142537 | 437                   | Russia         | 2015 | 437/RUS/15         |
| 153 | MF142478 | MF142549 | 590                   | Russia         | 2015 | 590/RUS/15         |
| 154 | MF142479 | MF142550 | 593                   | Russia         | 2015 | 593/RUS/15         |
| 155 | MF142481 | MF142552 | 624                   | Russia         | 2015 | 624/RUS/15         |
| 156 | MF142482 | MF142554 | 630                   | Russia         | 2015 | 630/RUS/15         |
| 157 | MF142483 | MF142555 | 636                   | Russia         | 2015 | 636/RUS/15         |
| 158 | MF142484 | MF142556 | 641                   | Russia         | 2015 | 641/RUS/15         |
| 159 | MF142486 | MF142561 | 711                   | Russia         | 2015 | 711/RUS/15         |
| 160 | MF142487 | MF142562 | 713                   | Russia         | 2015 | 713/RUS/15         |
| 161 | MF142488 | MF142563 | 716                   | Russia         | 2015 | 716/RUS/15         |
| 162 | MF142489 | MF142564 | 717                   | Russia         | 2015 | 717/RUS/15         |
| 163 | MF142490 | MF142565 | 727                   | Russia         | 2015 | 727/RUS/15         |
| 164 | MF142491 | MF142566 | 731                   | Russia         | 2015 | 731/RUS/15         |
| 165 | MF142492 | MF142567 | 735                   | Russia         | 2015 | 735/RUS/15         |
| 166 | MF142497 | MF142578 | 774                   | Kazakhstan     | 2016 | 774/KAZ/16         |
| 167 | MN765057 | MN737273 | UVC1                  | Nigeria        | 2019 | UVC1/NG/19         |
| 168 | MN765058 | MN737277 | AT6                   | Nigeria        | 2019 | AT6/NG/19          |
| 169 | KP266340 | KP266329 | BAUCHI37              | Nigeria        | 2012 | BAUCHI37/NG/12     |
| 170 | KP266339 | KP152305 | PLATEAU7              | Nigeria        | 2009 | PLATEAU7/NG/09     |
| 171 | MZ687403 | MZ687395 | 7                     | Portugal       | 2021 | 7/PRT/21           |
| 172 | MZ687405 | MZ687397 | 76                    | Portugal       | 2021 | 76/PRT/21          |
| 173 | MZ687406 | MZ687400 | 168                   | Portugal       | 2021 | 168/PRT/21         |

|     |          |          |           |                |      |                  |
|-----|----------|----------|-----------|----------------|------|------------------|
| 174 | MZ687407 | MZ687401 | 189       | Portugal       | 2021 | 189/PRT/21       |
| 175 | MZ687408 | MZ687402 | 201       | Portugal       | 2021 | 201/PRT/21       |
| 176 | -        | MN702848 | D4628/2   | Czech Republic | 2019 | D4628/2/CZE/19   |
| 177 | -        | MN702836 | D3994/1/8 | Netherlands    | 2017 | D3994/1/8/NLD/17 |
| 178 | -        | MN702837 | D3996/1/1 | Belgium        | 2017 | D3996/1/1/BEL/17 |
| 179 | -        | MN702847 | D4389/1   | Sweden         | 2018 | D4389/1/SWD/18   |
| 180 | -        | MN702839 | D4051/1   | Sweden         | 2017 | D4051/1/SWD/17   |

---

Table S9. Evolutionary divergence estimates between mature VP1 sequences of the study isolates and other IBDV isolates for gene-wise analysis.

| Species 1        | Species 2           | Distance ( <i>d</i> ) |
|------------------|---------------------|-----------------------|
| <b>rA/USA/09</b> | <b>rB/USA/09</b>    | <b>0.005073</b>       |
| <b>rA/USA/09</b> | <b>D6948/NLD/89</b> | <b>0.016861</b>       |
| rA/USA/09        | DD1/RUS/16          | 0.018033              |
| rA/USA/09        | TASIK/IDS/94        | 0.018037              |
| rA/USA/09        | 89163/FRA/89        | 0.018814              |
| rA/USA/09        | ks/ISL/90           | 0.019203              |
| rA/USA/09        | mb/ISL/93           | 0.020362              |
| <b>rB/USA/09</b> | <b>D6948/NLD/89</b> | <b>0.021370</b>       |
| rA/USA/09        | HuB-1/CHN/00        | 0.022396              |
| rB/USA/09        | DD1/RUS/16          | 0.022542              |
| rB/USA/09        | TASIK/IDS/94        | 0.022546              |
| rB/USA/09        | 89163/FRA/89        | 0.023323              |
| rA/USA/09        | UK661/UK/95         | 0.023626              |
| rB/USA/09        | ks/ISL/90           | 0.023711              |
| rA/USA/09        | Cro-Ig/CRT/02       | 0.024389              |
| rB/USA/09        | mb/ISL/93           | 0.024871              |
| rB/USA/09        | HuB-1/CHN/00        | 0.026905              |
| rB/USA/09        | UK661/UK/95         | 0.028134              |
| rB/USA/09        | Cro-Ig/CRT/02       | 0.028898              |
| rA/USA/09        | T09/NG/98           | 0.036101              |
| rB/USA/09        | T09/NG/98           | 0.040610              |
| rA/USA/09        | 150133/3.2/ALG/14   | 0.062025              |
| rA/USA/09        | TN46/19/TUN/19      | 0.062046              |
| rA/USA/09        | 150128/4.1/ALG/15   | 0.062412              |
| rB/USA/09        | 150133/3.2/ALG/14   | 0.066534              |
| rB/USA/09        | TN46/19/TUN/19      | 0.066555              |
| rB/USA/09        | 150128/4.1/ALG/15   | 0.066920              |
| rA/USA/09        | 150124/1.1/ALG/16   | 0.184470              |
| rA/USA/09        | 150144/5.1/ALG/15   | 0.185136              |
| rB/USA/09        | 150124/1.1/ALG/16   | 0.188979              |
| rA/USA/09        | 9109/USA/03         | 0.189158              |
| rB/USA/09        | 150144/5.1/ALG/15   | 0.189645              |
| rA/USA/09        | JD1/CHN/97          | 0.189883              |
| rA/USA/09        | HZ2/CHN/97          | 0.190093              |
| rA/USA/09        | STC/USA/67          | 0.191309              |
| rA/USA/09        | GZ/96/CHN/04        | 0.191761              |
| rB/USA/09        | 9109/USA/03         | 0.193667              |
| rA/USA/09        | F52/70/UK/70        | 0.194124              |
| rA/USA/09        | 903/78/HNG/78       | 0.194193              |
| rB/USA/09        | JD1/CHN/97          | 0.194392              |
| rB/USA/09        | HZ2/CHN/97          | 0.194602              |
| rA/USA/09        | Bpop-03/POL/03      | 0.194974              |
| rA/USA/09        | B87/CHN/06          | 0.195233              |
| rA/USA/09        | CEF94/NLD/73        | 0.195627              |
| rB/USA/09        | STC/USA/67          | 0.195818              |
| rA/USA/09        | KZC-104/ZMB/04      | 0.196024              |
| rB/USA/09        | GZ/96/CHN/04        | 0.196270              |
| rA/USA/09        | Gt/CHN/06           | 0.196415              |
| rA/USA/09        | Cu-1wt/GER/75       | 0.198315              |
| rB/USA/09        | F52/70/UK/70        | 0.198633              |
| rB/USA/09        | 903/78/HNG/78       | 0.198702              |
| rA/USA/09        | Harbin-1/CHN/92     | 0.199013              |
| rB/USA/09        | Bpop-03/POL/03      | 0.199483              |

|           |                    |          |
|-----------|--------------------|----------|
| rB/USA/09 | B87/CHN/06         | 0.199742 |
| rB/USA/09 | CEF94/NLD/73       | 0.200136 |
| rB/USA/09 | KZC-104/ZMB/04     | 0.200533 |
| rB/USA/09 | Gt/CHN/06          | 0.200923 |
| rA/USA/09 | OH/USA/82          | 0.202114 |
| rB/USA/09 | Cu-1wt/GER/75      | 0.202823 |
| rA/USA/09 | VarE/USA/94        | 0.203259 |
| rB/USA/09 | Harbin-1/CHN/92    | 0.203522 |
| rA/USA/09 | dIBDV/UY/2014/2202 | 0.205680 |
| rB/USA/09 | OH/USA/82          | 0.206623 |
| rB/USA/09 | VarE/USA/94        | 0.207768 |
| rB/USA/09 | dIBDV/UY/2014/2202 | 0.210189 |

rA and rB, showing the closest evolutionary distance to each other, are displayed in bold red. The isolate in bold black is the next closest to rA or rB.

Table S10. Evolutionary divergence estimates between VP2 sequences of the study isolates and other IBV isolates for gene-wise analysis.

| Species 1        | Species 2               | Distance ( <i>d</i> ) |
|------------------|-------------------------|-----------------------|
| <b>rA/USA/09</b> | <b>rB/USA/09</b>        | <b>0.00551634</b>     |
| <b>rB/USA/09</b> | <b>CAHFS-785/USA/11</b> | <b>0.01211331</b>     |
| <b>rA/USA/09</b> | <b>CAHFS-785/USA/11</b> | <b>0.01289615</b>     |
| rB/USA/09        | D6948/NLD/89            | 0.01345644            |
| rB/USA/09        | SH/92/KOR/92            | 0.01422350            |
| rB/USA/09        | ks/ISL/90               | 0.01422914            |
| rA/USA/09        | D6948/NLD/89            | 0.01423928            |
| rA/USA/09        | SH/92/KOR/92            | 0.01500634            |
| rB/USA/09        | 3529/MLS/92             | 0.01500896            |
| rA/USA/09        | ks/ISL/90               | 0.01501198            |
| rB/USA/09        | 89163/FRA/89            | 0.01579157            |
| rA/USA/09        | 3529/MLS/92             | 0.01579180            |
| rB/USA/09        | IBDV78/ABIC/NG/11       | 0.01579200            |
| rB/USA/09        | mb/ISL/93               | 0.01579200            |
| rB/USA/09        | UK661/UK/95             | 0.01579597            |
| rB/USA/09        | Ventri/IND/10           | 0.01656166            |
| rA/USA/09        | 89163/FRA/89            | 0.01657442            |
| rA/USA/09        | IBDV78/ABIC/NG/11       | 0.01657485            |
| rA/USA/09        | mb/ISL/93               | 0.01657485            |
| rA/USA/09        | UK661/UK/95             | 0.01657882            |
| rB/USA/09        | DD1/RUS/16              | 0.01658214            |
| rB/USA/09        | HuB-1/CHN/00            | 0.01686122            |
| rA/USA/09        | Ventri/IND/10           | 0.01734451            |
| rA/USA/09        | DD1/RUS/16              | 0.01736499            |
| rB/USA/09        | GZ/96/CHN/04            | 0.01737064            |
| rA/USA/09        | HuB-1/CHN/00            | 0.01764406            |
| rB/USA/09        | Harbin-1/CHN/92         | 0.01814449            |
| rA/USA/09        | GZ/96/CHN/04            | 0.01815348            |
| rA/USA/09        | Harbin-1/CHN/92         | 0.01892733            |
| rB/USA/09        | HHN81/FRA/19            | 0.01973027            |
| rB/USA/09        | HHN79/FRA/19            | 0.01973967            |
| rB/USA/09        | TASIK/IDS/94            | 0.01976089            |
| rA/USA/09        | HHN81/FRA/19            | 0.02051312            |
| rA/USA/09        | HHN79/FRA/19            | 0.02052252            |
| rA/USA/09        | TASIK/IDS/94            | 0.02054373            |
| rB/USA/09        | Bpop-03/POL/03          | 0.02130091            |
| rB/USA/09        | Chinju/KOR/02           | 0.02140288            |
| rA/USA/09        | Bpop-03/POL/03          | 0.02208376            |
| rA/USA/09        | Chinju/KOR/02           | 0.02218572            |
| rB/USA/09        | 7741-SEGA/USA/12        | 0.02376295            |
| rA/USA/09        | 7741-SEGA/USA/12        | 0.02454579            |
| rB/USA/09        | Cro-Ig/CRT/02           | 0.02470776            |
| rA/USA/09        | Cro-Ig/CRT/02           | 0.02549061            |
| rB/USA/09        | KZC-104/ZMB/04          | 0.02811255            |
| rA/USA/09        | KZC-104/ZMB/04          | 0.02889540            |
| rB/USA/09        | T09/NG/98               | 0.02893588            |
| rA/USA/09        | T09/NG/98               | 0.02971873            |
| rB/USA/09        | 150124/1.1/ALG/16       | 0.03910104            |
| rA/USA/09        | 150124/1.1/ALG/16       | 0.03988389            |
| rB/USA/09        | 150133/3.2/ALG/14       | 0.03992714            |
| rB/USA/09        | TN46/19/TUN/19          | 0.04043404            |
| rB/USA/09        | 150128/4.1/ALG/15       | 0.04070645            |
| rA/USA/09        | 150133/3.2/ALG/14       | 0.04070999            |



|           |                   |            |
|-----------|-------------------|------------|
| rB/USA/09 | 150144/5.1/ALG/15 | 0.04071140 |
| rA/USA/09 | TN46/19/TUN/19    | 0.04121688 |
| rA/USA/09 | 150128/4.1/ALG/15 | 0.04148929 |
| rA/USA/09 | 150144/5.1/ALG/15 | 0.04149425 |
| rB/USA/09 | STC/USA/67        | 0.05187681 |
| rB/USA/09 | F52/70/UK/70      | 0.05228597 |
| rA/USA/09 | STC/USA/67        | 0.05265965 |
| rA/USA/09 | F52/70/UK/70      | 0.05306881 |
| rB/USA/09 | 903/78/HNG/78     | 0.05321085 |
| rB/USA/09 | CEF94/NLD/73      | 0.05399110 |
| rA/USA/09 | 903/78/HNG/78     | 0.05399370 |
| rB/USA/09 | Cu-1wt/GER/75     | 0.05401096 |
| rA/USA/09 | CEF94/NLD/73      | 0.05477395 |
| rA/USA/09 | Cu-1wt/GER/75     | 0.05479381 |
| rB/USA/09 | JD1/CHN/97        | 0.05479648 |
| rB/USA/09 | Gt/CHN/06         | 0.05555440 |
| rA/USA/09 | JD1/CHN/97        | 0.05557933 |
| rA/USA/09 | Gt/CHN/06         | 0.05633724 |
| rB/USA/09 | HZ2/CHN/97        | 0.05713022 |
| rA/USA/09 | HZ2/CHN/97        | 0.05791306 |
| rB/USA/09 | B87/CHN/06        | 0.05794985 |
| rA/USA/09 | B87/CHN/06        | 0.05873270 |
| rB/USA/09 | VarE/USA/94       | 0.05948172 |
| rA/USA/09 | VarE/USA/94       | 0.06026457 |
| rB/USA/09 | 9109/USA/03       | 0.06987537 |
| rA/USA/09 | 9109/USA/03       | 0.07065821 |
| rB/USA/09 | dIBDV/2202/URY/14 | 0.07189605 |
| rA/USA/09 | dIBDV/2202/URY/14 | 0.07267890 |
| rB/USA/09 | OH/USA/82         | 0.48834297 |
| rA/USA/09 | OH/USA/82         | 0.48912581 |

rA and rB, showing the least evolutionary divergence from each other, are demonstrated in bold red. The isolate in bold black is the next closest to rA or rB.

Table S11. Evolutionary divergence estimates between VP3 sequences of the study isolates and other IBDV isolates for gene-wise analysis.

| Species 1        | Species 2         | Distance ( <i>d</i> ) |
|------------------|-------------------|-----------------------|
| <b>rA/USA/09</b> | <b>rB/USA/09</b>  | <b>0.0057214</b>      |
| <b>rB/USA/09</b> | <b>ks/ISL/90</b>  | <b>0.0191541</b>      |
| rB/USA/09        | Ventri/IND/10     | 0.0191697             |
| rB/USA/09        | mb/ISL/93         | 0.0191697             |
| rB/USA/09        | IBDV78/ABIC/NG/11 | 0.0191697             |
| <b>rA/USA/09</b> | <b>ks/ISL/90</b>  | <b>0.0221667</b>      |
| rA/USA/09        | Ventri/IND/10     | 0.0221822             |
| rA/USA/09        | mb/ISL/93         | 0.0221822             |
| rA/USA/09        | IBDV78/ABIC/NG/11 | 0.0221822             |
| rB/USA/09        | TASIK/IDS/94      | 0.0233849             |
| rB/USA/09        | 3529/MLS/92       | 0.0247903             |
| rB/USA/09        | 89163/FRA/89      | 0.0248012             |
| rB/USA/09        | D6948/NLD/89      | 0.0248055             |
| rB/USA/09        | Chinju/KOR/02     | 0.0248214             |
| rB/USA/09        | DD1/RUS/16        | 0.0261998             |
| rA/USA/09        | TASIK/IDS/94      | 0.0263974             |
| rA/USA/09        | 3529/MLS/92       | 0.0278028             |
| rA/USA/09        | 89163/FRA/89      | 0.0278137             |
| rA/USA/09        | D6948/NLD/89      | 0.0278180             |
| rA/USA/09        | Chinju/KOR/02     | 0.0278339             |
| rB/USA/09        | HHN81/FRA/19      | 0.0282603             |
| rB/USA/09        | HHN79/FRA/19      | 0.0282603             |
| rB/USA/09        | CAHFS-785/USA/11  | 0.0291500             |
| rB/USA/09        | HuB-1/CHN/00      | 0.0291746             |
| rA/USA/09        | DD1/RUS/16        | 0.0292124             |
| rB/USA/09        | SH/92/KOR/92      | 0.0300000             |
| rB/USA/09        | UK661/UK/95       | 0.0305520             |
| rB/USA/09        | GZ/96/CHN/04      | 0.0306055             |
| rA/USA/09        | HHN81/FRA/19      | 0.0312729             |
| rA/USA/09        | HHN79/FRA/19      | 0.0312729             |
| rB/USA/09        | Harbin-1/CHN/92   | 0.0319937             |
| rB/USA/09        | Bpop-03/POL/03    | 0.0320555             |
| rB/USA/09        | T09/NG/98         | 0.0320716             |
| rA/USA/09        | CAHFS-785/USA/11  | 0.0321626             |
| rA/USA/09        | HuB-1/CHN/00      | 0.0321871             |
| rB/USA/09        | Cro-Ig/CRT/02     | 0.0322795             |
| rA/USA/09        | SH/92/KOR/92      | 0.0330126             |
| rB/USA/09        | 7741-SEGA/USA/12  | 0.0335165             |
| rA/USA/09        | UK661/UK/95       | 0.0335646             |
| rA/USA/09        | GZ/96/CHN/04      | 0.0336180             |
| rA/USA/09        | Harbin-1/CHN/92   | 0.0350063             |
| rA/USA/09        | Bpop-03/POL/03    | 0.0350680             |
| rA/USA/09        | T09/NG/98         | 0.0350842             |
| rA/USA/09        | Cro-Ig/CRT/02     | 0.0352921             |
| rA/USA/09        | 7741-SEGA/USA/12  | 0.0365290             |
| rB/USA/09        | TN46/19/TUN/19    | 0.0381045             |
| rB/USA/09        | 150144/5.1/ALG/15 | 0.0395292             |
| rB/USA/09        | 150124/1.1/ALG/16 | 0.0395436             |
| rA/USA/09        | TN46/19/TUN/19    | 0.0411170             |
| rB/USA/09        | 150133/3.2/ALG/14 | 0.0415670             |
| rA/USA/09        | 150144/5.1/ALG/15 | 0.0425418             |
| rA/USA/09        | 150124/1.1/ALG/16 | 0.0425561             |
| rB/USA/09        | 150128/4.1/ALG/15 | 0.0429482             |

|           |                   |           |
|-----------|-------------------|-----------|
| rA/USA/09 | 150133/3.2/ALG/14 | 0.0445796 |
| rB/USA/09 | KZC-104/ZMB/04    | 0.0450113 |
| rA/USA/09 | 150128/4.1/ALG/15 | 0.0459607 |
| rA/USA/09 | KZC-104/ZMB/04    | 0.0480238 |
| rB/USA/09 | 9109/USA/03       | 0.0638955 |
| rB/USA/09 | CEF94/NLD/73      | 0.0662091 |
| rB/USA/09 | Gt/CHN/06         | 0.0662169 |
| rB/USA/09 | 903/78/HNG/78     | 0.0662246 |
| rA/USA/09 | 9109/USA/03       | 0.0669080 |
| rB/USA/09 | JD1/CHN/97        | 0.0691077 |
| rA/USA/09 | CEF94/NLD/73      | 0.0692216 |
| rA/USA/09 | Gt/CHN/06         | 0.0692294 |
| rA/USA/09 | 903/78/HNG/78     | 0.0692372 |
| rB/USA/09 | B87/CHN/06        | 0.0705421 |
| rB/USA/09 | Cu-1wt/GER/75     | 0.0706318 |
| rB/USA/09 | HZ2/CHN/97        | 0.0719826 |
| rA/USA/09 | JD1/CHN/97        | 0.0721203 |
| rA/USA/09 | B87/CHN/06        | 0.0735547 |
| rA/USA/09 | Cu-1wt/GER/75     | 0.0736443 |
| rA/USA/09 | HZ2/CHN/97        | 0.0749951 |
| rB/USA/09 | STC/USA/67        | 0.0753763 |
| rB/USA/09 | F52/70/UK/70      | 0.0761823 |
| rB/USA/09 | VarE/USA/94       | 0.0776544 |
| rA/USA/09 | STC/USA/67        | 0.0783888 |
| rA/USA/09 | F52/70/UK/70      | 0.0791949 |
| rA/USA/09 | VarE/USA/94       | 0.0806669 |
| rB/USA/09 | dIBDV/2202/URY/14 | 0.0974264 |
| rA/USA/09 | dIBDV/2202/URY/14 | 0.1004390 |
| rB/USA/09 | OH/USA/82         | 0.3458822 |
| rA/USA/09 | OH/USA/82         | 0.3488948 |

The study isolates rA and rB, displayed in bold red, were the closest evolutionary related with respect to the VP3 sequences. These isolates were next closely related to the ks isolate shown in bold black.

Table S12. Evolutionary divergence estimates between VP4 sequences of the study isolates and other IBDV isolates for gene-wise analysis.

| Species 1        | Species 2         | Distance ( <i>d</i> ) |
|------------------|-------------------|-----------------------|
| <b>rA/USA/09</b> | <b>rB/USA/09</b>  | <b>0.0084760</b>      |
| <b>rB/USA/09</b> | <b>ks/ISL/90</b>  | <b>0.0114482</b>      |
| rB/USA/09        | CAHFS-785/USA/11  | 0.0128848             |
| rB/USA/09        | Ventri/IND/10     | 0.0142503             |
| rB/USA/09        | IBDV78/ABIC/NG/11 | 0.0142586             |
| rB/USA/09        | mb/ISL/93         | 0.0142586             |
| rB/USA/09        | 89163/FRA/89      | 0.0142907             |
| rB/USA/09        | TASIK/IDS/94      | 0.0156744             |
| rB/USA/09        | D6948/NLD/89      | 0.0156770             |
| rB/USA/09        | GZ/96/CHN/04      | 0.0170629             |
| <b>rA/USA/09</b> | <b>ks/ISL/90</b>  | <b>0.0172084</b>      |
| rA/USA/09        | CAHFS-785/USA/11  | 0.0186449             |
| rB/USA/09        | Bpop-03/POL/03    | 0.0198821             |
| rB/USA/09        | DD1/RUS/16        | 0.0199034             |
| rA/USA/09        | Ventri/IND/10     | 0.0200105             |
| rA/USA/09        | IBDV78/ABIC/NG/11 | 0.0200187             |
| rA/USA/09        | mb/ISL/93         | 0.0200187             |
| rA/USA/09        | 89163/FRA/89      | 0.0200509             |
| rB/USA/09        | Harbin-1/CHN/92   | 0.0212618             |
| rB/USA/09        | 3529/MLS/92       | 0.0213119             |
| rB/USA/09        | HuB-1/CHN/00      | 0.0213224             |
| rB/USA/09        | SH/92/KOR/92      | 0.0213647             |
| rA/USA/09        | TASIK/IDS/94      | 0.0214346             |
| rA/USA/09        | D6948/NLD/89      | 0.0214372             |
| rA/USA/09        | GZ/96/CHN/04      | 0.0228231             |
| rB/USA/09        | Chinju/KOR/02     | 0.0242065             |
| rB/USA/09        | Cro-Ig/CRT/02     | 0.0242292             |
| rB/USA/09        | UK661/UK/95       | 0.0256032             |
| rA/USA/09        | Bpop-03/POL/03    | 0.0256423             |
| rA/USA/09        | DD1/RUS/16        | 0.0256636             |
| rA/USA/09        | Harbin-1/CHN/92   | 0.0270220             |
| rA/USA/09        | 3529/MLS/92       | 0.0270721             |
| rA/USA/09        | HuB-1/CHN/00      | 0.0270825             |
| rA/USA/09        | SH/92/KOR/92      | 0.0271249             |
| rB/USA/09        | HHN81/FRA/19      | 0.0285076             |
| rB/USA/09        | HHN79/FRA/19      | 0.0285076             |
| rB/USA/09        | 7741-SEGA/USA/12  | 0.0286803             |
| rB/USA/09        | T09/NG/98         | 0.0288216             |
| rA/USA/09        | Chinju/KOR/02     | 0.0299667             |
| rA/USA/09        | Cro-Ig/CRT/02     | 0.0299893             |
| rA/USA/09        | UK661/UK/95       | 0.0313634             |
| rA/USA/09        | HHN81/FRA/19      | 0.0342678             |
| rA/USA/09        | HHN79/FRA/19      | 0.0342678             |
| rA/USA/09        | 7741-SEGA/USA/12  | 0.0344404             |
| rA/USA/09        | T09/NG/98         | 0.0345817             |
| rB/USA/09        | KZC-104/ZMB/04    | 0.0358359             |
| rA/USA/09        | KZC-104/ZMB/04    | 0.0415961             |
| rB/USA/09        | 150133/3.2/ALG/14 | 0.0447740             |
| rB/USA/09        | TN46/19/TUN/19    | 0.0454510             |
| rB/USA/09        | 150128/4.1/ALG/15 | 0.0475604             |
| rB/USA/09        | 150124/1.1/ALG/16 | 0.0489805             |
| rA/USA/09        | 150133/3.2/ALG/14 | 0.0505342             |
| rA/USA/09        | TN46/19/TUN/19    | 0.0512112             |

|           |                   |           |
|-----------|-------------------|-----------|
| rB/USA/09 | 150144/5.1/ALG/15 | 0.0519517 |
| rA/USA/09 | 150128/4.1/ALG/15 | 0.0533206 |
| rA/USA/09 | 150124/1.1/ALG/16 | 0.0547407 |
| rA/USA/09 | 150144/5.1/ALG/15 | 0.0577119 |
| rB/USA/09 | Cu-1wt/GER/75     | 0.0657544 |
| rB/USA/09 | F52/70/UK/70      | 0.0713938 |
| rA/USA/09 | Cu-1wt/GER/75     | 0.0715146 |
| rB/USA/09 | STC/USA/67        | 0.0717589 |
| rB/USA/09 | VarE/USA/94       | 0.0725303 |
| rB/USA/09 | 903/78/HNG/78     | 0.0729188 |
| rB/USA/09 | CEF94/NLD/73      | 0.0743148 |
| rB/USA/09 | Gt/CHN/06         | 0.0757049 |
| rB/USA/09 | JD1/CHN/97        | 0.0757081 |
| rA/USA/09 | F52/70/UK/70      | 0.0771540 |
| rA/USA/09 | STC/USA/67        | 0.0775191 |
| rA/USA/09 | VarE/USA/94       | 0.0782905 |
| rB/USA/09 | HZ2/CHN/97        | 0.0784997 |
| rA/USA/09 | 903/78/HNG/78     | 0.0786789 |
| rB/USA/09 | B87/CHN/06        | 0.0799084 |
| rA/USA/09 | CEF94/NLD/73      | 0.0800750 |
| rA/USA/09 | Gt/CHN/06         | 0.0814651 |
| rA/USA/09 | JD1/CHN/97        | 0.0814683 |
| rA/USA/09 | HZ2/CHN/97        | 0.0842599 |
| rB/USA/09 | 9109/USA/03       | 0.0844826 |
| rA/USA/09 | B87/CHN/06        | 0.0856686 |
| rA/USA/09 | 9109/USA/03       | 0.0902427 |
| rB/USA/09 | dIBDV/2202/URY/14 | 0.1059649 |
| rA/USA/09 | dIBDV/2202/URY/14 | 0.1117251 |
| rB/USA/09 | OH/USA/82         | 0.3923561 |
| rA/USA/09 | OH/USA/82         | 0.3981163 |

The study isolates rA and rB, displayed in bold red, were the closest evolutionary related in terms of the VP4 sequences. These isolates were next closely related to the ks isolate shown in bold black.

Table S13. Evolutionary divergence estimates between VP5 sequences of the study isolates and other IBDV isolates for gene-wise analysis.

| Species 1        | Species 2         | Distance (d)     |
|------------------|-------------------|------------------|
| <b>rB/USA/09</b> | <b>mb/ISL/93</b>  | <b>0.0023832</b> |
| rB/USA/09        | ks/ISL/90         | 0.0023966        |
| rB/USA/09        | IBDV78/ABIC/NG/11 | 0.0023966        |
| rB/USA/09        | HHN79/FRA/19      | 0.0024367        |
| rB/USA/09        | KZC-104/ZMB/04    | 0.0024501        |
| rB/USA/09        | SH/92/KOR/92      | 0.0024769        |
| rB/USA/09        | DD1/RUS/16        | 0.0047146        |
| rB/USA/09        | Chinju/KOR/02     | 0.0047146        |
| rB/USA/09        | HHN81/FRA/19      | 0.0047661        |
| rB/USA/09        | TASIK/IDS/94      | 0.0047681        |
| rB/USA/09        | UK661/UK/95       | 0.0047794        |
| rB/USA/09        | D6948/NLD/89      | 0.0047800        |
| rB/USA/09        | 3529/MLS/92       | 0.0055829        |
| rB/USA/09        | Ventri/IND/10     | 0.0062084        |
| <b>rA/USA/09</b> | <b>rB/USA/09</b>  | <b>0.0069523</b> |
| rB/USA/09        | CAHFS-785/USA/11  | 0.0070465        |
| rB/USA/09        | 7741-SEGA/USA/12  | 0.0070465        |
| rB/USA/09        | 89163/FRA/89      | 0.0070594        |
| rB/USA/09        | T09/NG/98         | 0.0070670        |
| rB/USA/09        | Bpop-03/POL/03    | 0.0070727        |
| rB/USA/09        | Cro-Ig/CRT/02     | 0.0071158        |
| rA/USA/09        | mb/ISL/93         | 0.0093087        |
| rA/USA/09        | ks/ISL/90         | 0.0093221        |
| rA/USA/09        | IBDV78/ABIC/NG/11 | 0.0093221        |
| rA/USA/09        | HHN79/FRA/19      | 0.0093622        |
| rA/USA/09        | KZC-104/ZMB/04    | 0.0093756        |
| rA/USA/09        | SH/92/KOR/92      | 0.0094024        |
| rB/USA/09        | HuB-1/CHN/00      | 0.0094804        |
| rA/USA/09        | DD1/RUS/16        | 0.0116401        |
| rA/USA/09        | Chinju/KOR/02     | 0.0116401        |
| rA/USA/09        | HHN81/FRA/19      | 0.0116916        |
| rA/USA/09        | TASIK/IDS/94      | 0.0116936        |
| rA/USA/09        | UK661/UK/95       | 0.0117049        |
| rA/USA/09        | D6948/NLD/89      | 0.0117055        |
| rB/USA/09        | Harbin-1/CHN/92   | 0.0117496        |
| rB/USA/09        | GZ/96/CHN/04      | 0.0117630        |
| rA/USA/09        | 3529/MLS/92       | 0.0125084        |
| rA/USA/09        | Ventri/IND/10     | 0.0131339        |
| rA/USA/09        | CAHFS-785/USA/11  | 0.0139720        |
| rA/USA/09        | 7741-SEGA/USA/12  | 0.0139720        |
| rA/USA/09        | 89163/FRA/89      | 0.0139849        |
| rA/USA/09        | T09/NG/98         | 0.0139925        |
| rA/USA/09        | Bpop-03/POL/03    | 0.0139982        |
| rA/USA/09        | Cro-Ig/CRT/02     | 0.0140413        |
| rB/USA/09        | VarE/USA/94       | 0.0141430        |
| rB/USA/09        | Cu-1wt/GER/75     | 0.0141745        |
| rB/USA/09        | 9109/USA/03       | 0.0141831        |
| rB/USA/09        | 150128/4.1/ALG/15 | 0.0143616        |
| rB/USA/09        | 150133/3.2/ALG/14 | 0.0143616        |
| rA/USA/09        | HuB-1/CHN/00      | 0.0164059        |
| rB/USA/09        | F52/70/UK/70      | 0.0164856        |
| rA/USA/09        | 150128/4.1/ALG/15 | 0.0166436        |
| rA/USA/09        | 150133/3.2/ALG/14 | 0.0166436        |

|           |                   |           |
|-----------|-------------------|-----------|
| rB/USA/09 | 150124/1.1/ALG/16 | 0.0166679 |
| rA/USA/09 | Harbin-1/CHN/92   | 0.0186751 |
| rA/USA/09 | GZ/96/CHN/04      | 0.0186885 |
| rB/USA/09 | 903/78/HNG/78     | 0.0188570 |
| rB/USA/09 | Gt/CHN/06         | 0.0188646 |
| rB/USA/09 | STC/USA/67        | 0.0188656 |
| rB/USA/09 | JD1/CHN/97        | 0.0188838 |
| rB/USA/09 | CEF94/NLD/73      | 0.0189106 |
| rB/USA/09 | HZ2/CHN/97        | 0.0189106 |
| rA/USA/09 | 150124/1.1/ALG/16 | 0.0189499 |
| rB/USA/09 | 150144/5.1/ALG/15 | 0.0190180 |
| rB/USA/09 | TN46/19/TUN/19    | 0.0195879 |
| rA/USA/09 | VarE/USA/94       | 0.0210685 |
| rA/USA/09 | Cu-1wt/GER/75     | 0.0211000 |
| rA/USA/09 | 9109/USA/03       | 0.0211086 |
| rA/USA/09 | 150144/5.1/ALG/15 | 0.0213001 |
| rA/USA/09 | TN46/19/TUN/19    | 0.0218699 |
| rA/USA/09 | F52/70/UK/70      | 0.0234111 |
| rB/USA/09 | B87/CHN/06        | 0.0235238 |
| rA/USA/09 | 903/78/HNG/78     | 0.0257825 |
| rA/USA/09 | Gt/CHN/06         | 0.0257901 |
| rA/USA/09 | STC/USA/67        | 0.0257911 |
| rA/USA/09 | JD1/CHN/97        | 0.0258093 |
| rA/USA/09 | CEF94/NLD/73      | 0.0258361 |
| rA/USA/09 | HZ2/CHN/97        | 0.0258361 |
| rB/USA/09 | dIBDV/2202/URY/14 | 0.0269099 |
| rA/USA/09 | B87/CHN/06        | 0.0304493 |
| rA/USA/09 | dIBDV/2202/URY/14 | 0.0338354 |
| rB/USA/09 | OH/USA/82         | 0.1432187 |
| rA/USA/09 | OH/USA/82         | 0.1501442 |

rA was most related to rB (shown in bold black). rB was the closest to mb isolate (shown in bold red).

Table S14. Best fitting model selection for VP1 using Maximum Likelihood fits of 24 different nucleotide substitution models.

| Model          | BIC             | AICc     | lnL       | I      | G      | R      | FreqA  | FreqT  | FreqC  | FreqG  | A=>T | A=>C | A=>G | T=>A | T=>C | T=>G | C=>A | C=>T | C=>G | G=>A | G=>T | G=>C |
|----------------|-----------------|----------|-----------|--------|--------|--------|--------|--------|--------|--------|------|------|------|------|------|------|------|------|------|------|------|------|
| <b>TN93+G*</b> | <b>20434.79</b> | 19768.70 | -9813.29  | n/a    | 0.1885 | 3.6516 | 0.2847 | 0.1908 | 0.2695 | 0.2550 | 0.02 | 0.03 | 0.13 | 0.03 | 0.3  | 0.03 | 0.03 | 0.22 | 0.03 | 0.14 | 0.02 | 0.03 |
| TN93+G+I       | 20440.42        | 19764.95 | -9810.42  | 0.5177 | 0.7745 | 3.7135 | 0.2847 | 0.1908 | 0.2695 | 0.2550 | 0.02 | 0.03 | 0.13 | 0.03 | 0.31 | 0.03 | 0.03 | 0.22 | 0.03 | 0.14 | 0.02 | 0.03 |
| GTR+G+I        | 20440.67        | 19737.06 | -9793.46  | 0.4147 | 0.5144 | 3.1849 | 0.2847 | 0.1908 | 0.2695 | 0.2550 | 0.04 | 0.03 | 0.13 | 0.05 | 0.28 | 0.02 | 0.03 | 0.2  | 0.02 | 0.15 | 0.01 | 0.02 |
| GTR+G          | 20443.96        | 19749.73 | -9800.80  | n/a    | 0.1915 | 3.0444 | 0.2847 | 0.1908 | 0.2695 | 0.2550 | 0.04 | 0.03 | 0.13 | 0.05 | 0.28 | 0.02 | 0.03 | 0.2  | 0.03 | 0.15 | 0.01 | 0.03 |
| HKY+G          | 20492.40        | 19835.69 | -9847.79  | n/a    | 0.1802 | 3.6461 | 0.2847 | 0.1908 | 0.2695 | 0.2550 | 0.02 | 0.03 | 0.2  | 0.03 | 0.21 | 0.03 | 0.03 | 0.15 | 0.03 | 0.22 | 0.02 | 0.03 |
| K2+G           | 20499.57        | 19871.00 | -9868.45  | n/a    | 0.1861 | 3.4902 | 0.25   | 0.25   | 0.25   | 0.25   | 0.03 | 0.03 | 0.19 | 0.03 | 0.19 | 0.03 | 0.03 | 0.19 | 0.03 | 0.19 | 0.03 | 0.03 |
| HKY+G+I        | 20505.34        | 19839.25 | -9848.57  | 0.3231 | 0.3637 | 3.6937 | 0.2847 | 0.1908 | 0.2695 | 0.2550 | 0.02 | 0.03 | 0.2  | 0.03 | 0.21 | 0.03 | 0.03 | 0.15 | 0.03 | 0.22 | 0.02 | 0.03 |
| K2+G+I         | 20512.62        | 19874.67 | -9869.28  | 0.3938 | 0.4706 | 3.5332 | 0.25   | 0.25   | 0.25   | 0.25   | 0.03 | 0.03 | 0.19 | 0.03 | 0.19 | 0.03 | 0.03 | 0.19 | 0.03 | 0.19 | 0.03 | 0.03 |
| T92+G          | 20516.69        | 19878.74 | -9871.32  | n/a    | 0.1873 | 3.4903 | 0.2378 | 0.2378 | 0.2622 | 0.2622 | 0.03 | 0.03 | 0.2  | 0.03 | 0.2  | 0.03 | 0.03 | 0.18 | 0.03 | 0.18 | 0.03 | 0.03 |
| T92+G+I        | 20524.58        | 19877.25 | -9869.57  | 0.3753 | 0.4429 | 3.5384 | 0.2378 | 0.2378 | 0.2622 | 0.2622 | 0.03 | 0.03 | 0.2  | 0.03 | 0.2  | 0.03 | 0.03 | 0.19 | 0.03 | 0.19 | 0.03 | 0.03 |
| TN93+I         | 20813.32        | 20147.23 | -10002.56 | 0.3818 | n/a    | 3.2474 | 0.2847 | 0.1908 | 0.2695 | 0.2550 | 0.02 | 0.03 | 0.13 | 0.03 | 0.29 | 0.03 | 0.03 | 0.21 | 0.03 | 0.14 | 0.02 | 0.03 |
| GTR+I          | 20824.86        | 20130.63 | -9991.25  | 0.3818 | n/a    | 2.6579 | 0.2847 | 0.1908 | 0.2695 | 0.2550 | 0.04 | 0.04 | 0.13 | 0.06 | 0.27 | 0.02 | 0.04 | 0.19 | 0.03 | 0.15 | 0.02 | 0.03 |
| K2+I           | 20883.37        | 20254.80 | -10060.35 | 0.3818 | n/a    | 3.1595 | 0.25   | 0.25   | 0.25   | 0.25   | 0.03 | 0.03 | 0.19 | 0.03 | 0.19 | 0.03 | 0.03 | 0.19 | 0.03 | 0.19 | 0.03 | 0.03 |
| T92+I          | 20895.62        | 20257.67 | -10060.78 | 0.3818 | n/a    | 3.1633 | 0.2378 | 0.2378 | 0.2622 | 0.2622 | 0.03 | 0.03 | 0.2  | 0.03 | 0.2  | 0.03 | 0.03 | 0.18 | 0.03 | 0.18 | 0.03 | 0.03 |
| HKY+I          | 20897.70        | 20240.99 | -10050.44 | 0.3818 | n/a    | 3.2089 | 0.2847 | 0.1908 | 0.2695 | 0.2550 | 0.02 | 0.03 | 0.19 | 0.03 | 0.21 | 0.03 | 0.03 | 0.15 | 0.03 | 0.22 | 0.02 | 0.03 |
| TN93           | 21251.00        | 20594.29 | -10227.09 | n/a    | n/a    | 3.0772 | 0.2847 | 0.1908 | 0.2695 | 0.2550 | 0.02 | 0.03 | 0.13 | 0.03 | 0.28 | 0.03 | 0.03 | 0.2  | 0.03 | 0.15 | 0.02 | 0.03 |
| GTR            | 21261.55        | 20576.70 | -10215.29 | n/a    | n/a    | 2.5672 | 0.2847 | 0.1908 | 0.2695 | 0.2550 | 0.04 | 0.04 | 0.14 | 0.06 | 0.26 | 0.02 | 0.04 | 0.18 | 0.03 | 0.15 | 0.02 | 0.03 |
| K2             | 21310.96        | 20691.77 | -10279.83 | n/a    | n/a    | 3.0618 | 0.25   | 0.25   | 0.25   | 0.25   | 0.03 | 0.03 | 0.19 | 0.03 | 0.19 | 0.03 | 0.03 | 0.19 | 0.03 | 0.19 | 0.03 | 0.03 |
| T92            | 21323.20        | 20694.63 | -10280.26 | n/a    | n/a    | 3.0644 | 0.2378 | 0.2378 | 0.2622 | 0.2622 | 0.03 | 0.03 | 0.2  | 0.03 | 0.2  | 0.03 | 0.03 | 0.18 | 0.03 | 0.18 | 0.03 | 0.03 |
| HKY            | 21336.33        | 20689.00 | -10275.45 | n/a    | n/a    | 3.0675 | 0.2847 | 0.1908 | 0.2695 | 0.2550 | 0.02 | 0.03 | 0.19 | 0.03 | 0.2  | 0.03 | 0.03 | 0.14 | 0.03 | 0.21 | 0.02 | 0.03 |
| JC+G           | 21362.03        | 20742.84 | -10305.37 | n/a    | 0.2020 | 0.5    | 0.25   | 0.25   | 0.25   | 0.25   | 0.08 | 0.08 | 0.08 | 0.08 | 0.08 | 0.08 | 0.08 | 0.08 | 0.08 | 0.08 | 0.08 | 0.08 |
| JC+G+I         | 21367.96        | 20739.39 | -10302.65 | 0.1153 | 0.2533 | 0.5    | 0.25   | 0.25   | 0.25   | 0.25   | 0.08 | 0.08 | 0.08 | 0.08 | 0.08 | 0.08 | 0.08 | 0.08 | 0.08 | 0.08 | 0.08 | 0.08 |
| JC+I           | 21689.32        | 21070.13 | -10469.01 | 0.3882 | n/a    | 0.5    | 0.25   | 0.25   | 0.25   | 0.25   | 0.08 | 0.08 | 0.08 | 0.08 | 0.08 | 0.08 | 0.08 | 0.08 | 0.08 | 0.08 | 0.08 | 0.08 |
| JC             | 22108.45        | 21498.64 | -10684.27 | n/a    | n/a    | 0.5    | 0.25   | 0.25   | 0.25   | 0.25   | 0.08 | 0.08 | 0.08 | 0.08 | 0.08 | 0.08 | 0.08 | 0.08 | 0.08 | 0.08 | 0.08 | 0.08 |

\*Model with the lowest BIC scores (Bayesian Information Criterion) is considered to describe the substitution pattern best (shown in bold red). For each model. A total of 2640 positions existed in the final dataset. Abbreviations: TN93: Tamura-Nei; K2: Kimura 2-parameter; GTR: General Time Reversible; HKY: Hasegawa-Kishino-Yano; T92: Tamura 3-parameter; JC: Jukes-Cantor.



Table S15. Best fitting model selection for mature VP2 using Maximum Likelihood fits of 24 different nucleotide substitution models.

| Model         | BIC             | AICc     | lnL      | I      | G      | R      | FreqA  | FreqT  | FreqC  | FreqG  | A=>T | A=>C | A=>G | T=>A | T=>C | T=>G | C=>A | C=>T | C=>G | G=>A | G=>T | G=>C |
|---------------|-----------------|----------|----------|--------|--------|--------|--------|--------|--------|--------|------|------|------|------|------|------|------|------|------|------|------|------|
| <b>GTR+G*</b> | <b>10915.63</b> | 10092.64 | -4954.17 | n/a    | 0.2049 | 3.3050 | 0.2728 | 0.2069 | 0.2697 | 0.2507 | 0.04 | 0.05 | 0.14 | 0.05 | 0.28 | 0.02 | 0.05 | 0.21 | 0.01 | 0.15 | 0.02 | 0.01 |
| K2+G          | 10917.47        | 10157.08 | -4993.41 | n/a    | 0.2014 | 3.2629 | 0.25   | 0.25   | 0.25   | 0.25   | 0.03 | 0.03 | 0.19 | 0.03 | 0.19 | 0.03 | 0.03 | 0.19 | 0.03 | 0.19 | 0.03 | 0.03 |
| TN93+G        | 10922.15        | 10125.99 | -4973.85 | n/a    | 0.2005 | 3.3496 | 0.2728 | 0.2069 | 0.2697 | 0.2507 | 0.02 | 0.03 | 0.14 | 0.03 | 0.28 | 0.03 | 0.03 | 0.21 | 0.03 | 0.15 | 0.02 | 0.03 |
| K2+G+I        | 10925.65        | 10156.32 | -4992.03 | 0.3684 | 0.4413 | 3.2564 | 0.25   | 0.25   | 0.25   | 0.25   | 0.03 | 0.03 | 0.19 | 0.03 | 0.19 | 0.03 | 0.03 | 0.19 | 0.03 | 0.19 | 0.03 | 0.03 |
| GTR+G+I       | 10926.20        | 10094.28 | -4953.98 | 0.3892 | 0.4939 | 3.2894 | 0.2728 | 0.2069 | 0.2697 | 0.2507 | 0.04 | 0.05 | 0.14 | 0.05 | 0.28 | 0.02 | 0.05 | 0.21 | 0.01 | 0.15 | 0.02 | 0.01 |
| T92+G         | 10928.39        | 10159.05 | -4993.40 | n/a    | 0.2011 | 3.2720 | 0.2398 | 0.2398 | 0.2602 | 0.2602 | 0.03 | 0.03 | 0.2  | 0.03 | 0.2  | 0.03 | 0.03 | 0.18 | 0.03 | 0.18 | 0.03 | 0.03 |
| TN93+G+I      | 10930.16        | 10125.05 | -4972.38 | 0.3953 | 0.4941 | 3.3163 | 0.2728 | 0.2069 | 0.2697 | 0.2507 | 0.02 | 0.03 | 0.14 | 0.03 | 0.28 | 0.03 | 0.03 | 0.21 | 0.03 | 0.15 | 0.02 | 0.03 |
| HKY+G         | 10931.23        | 10144.01 | -4983.87 | n/a    | 0.1978 | 3.3494 | 0.2728 | 0.2069 | 0.2697 | 0.2507 | 0.02 | 0.03 | 0.19 | 0.03 | 0.21 | 0.03 | 0.03 | 0.16 | 0.03 | 0.21 | 0.02 | 0.03 |
| T92+G+I       | 10934.13        | 10155.85 | -4990.79 | 0.3700 | 0.4397 | 3.2768 | 0.2398 | 0.2398 | 0.2602 | 0.2602 | 0.03 | 0.03 | 0.2  | 0.03 | 0.2  | 0.03 | 0.03 | 0.18 | 0.03 | 0.18 | 0.03 | 0.03 |
| HKY+G+I       | 10941.14        | 10144.98 | -4983.35 | 0.3727 | 0.4433 | 3.3270 | 0.2728 | 0.2069 | 0.2697 | 0.2507 | 0.02 | 0.03 | 0.19 | 0.03 | 0.21 | 0.03 | 0.03 | 0.16 | 0.03 | 0.21 | 0.02 | 0.03 |
| GTR+I         | 10941.40        | 10118.41 | -4967.05 | 0.6629 | n/a    | 3.2898 | 0.2728 | 0.2069 | 0.2697 | 0.2507 | 0.04 | 0.04 | 0.13 | 0.05 | 0.28 | 0.02 | 0.05 | 0.21 | 0.01 | 0.15 | 0.02 | 0.01 |
| K2+I          | 10944.12        | 10183.74 | -5006.74 | 0.6709 | n/a    | 3.2134 | 0.25   | 0.25   | 0.25   | 0.25   | 0.03 | 0.03 | 0.19 | 0.03 | 0.19 | 0.03 | 0.03 | 0.19 | 0.03 | 0.19 | 0.03 | 0.03 |
| TN93+I        | 10946.77        | 10150.61 | -4986.16 | 0.6670 | n/a    | 3.3104 | 0.2728 | 0.2069 | 0.2697 | 0.2507 | 0.02 | 0.03 | 0.14 | 0.03 | 0.27 | 0.03 | 0.03 | 0.21 | 0.03 | 0.15 | 0.02 | 0.03 |
| T92+I         | 10955.02        | 10185.68 | -5006.71 | 0.6705 | n/a    | 3.2141 | 0.2398 | 0.2398 | 0.2602 | 0.2602 | 0.03 | 0.03 | 0.2  | 0.03 | 0.2  | 0.03 | 0.03 | 0.18 | 0.03 | 0.18 | 0.03 | 0.03 |
| HKY+I         | 10958.21        | 10170.99 | -4997.36 | 0.6717 | n/a    | 3.2887 | 0.2728 | 0.2069 | 0.2697 | 0.2507 | 0.02 | 0.03 | 0.19 | 0.03 | 0.21 | 0.03 | 0.03 | 0.16 | 0.03 | 0.21 | 0.02 | 0.03 |
| JC+G          | 11263.15        | 10511.71 | -5171.73 | n/a    | 0.2383 | 0.5    | 0.25   | 0.25   | 0.25   | 0.25   | 0.08 | 0.08 | 0.08 | 0.08 | 0.08 | 0.08 | 0.08 | 0.08 | 0.08 | 0.08 | 0.08 | 0.08 |
| JC+G+I        | 11269.55        | 10509.16 | -5169.45 | 0.3595 | 0.5107 | 0.5    | 0.25   | 0.25   | 0.25   | 0.25   | 0.08 | 0.08 | 0.08 | 0.08 | 0.08 | 0.08 | 0.08 | 0.08 | 0.08 | 0.08 | 0.08 | 0.08 |
| JC+I          | 11288.00        | 10536.56 | -5184.15 | 0.6572 | n/a    | 0.5    | 0.25   | 0.25   | 0.25   | 0.25   | 0.08 | 0.08 | 0.08 | 0.08 | 0.08 | 0.08 | 0.08 | 0.08 | 0.08 | 0.08 | 0.08 | 0.08 |
| K2            | 11290.36        | 10538.91 | -5185.33 | n/a    | n/a    | 2.3601 | 0.25   | 0.25   | 0.25   | 0.25   | 0.04 | 0.04 | 0.18 | 0.04 | 0.18 | 0.04 | 0.04 | 0.18 | 0.04 | 0.18 | 0.04 | 0.04 |
| TN93          | 11292.69        | 10505.47 | -5164.60 | n/a    | n/a    | 2.3648 | 0.2728 | 0.2069 | 0.2697 | 0.2507 | 0.03 | 0.04 | 0.13 | 0.04 | 0.24 | 0.04 | 0.04 | 0.19 | 0.04 | 0.14 | 0.03 | 0.04 |
| T92           | 11300.38        | 10539.99 | -5184.86 | n/a    | n/a    | 2.3627 | 0.2398 | 0.2398 | 0.2602 | 0.2602 | 0.04 | 0.04 | 0.18 | 0.04 | 0.18 | 0.04 | 0.04 | 0.17 | 0.04 | 0.17 | 0.04 | 0.04 |
| GTR           | 11307.21        | 10493.17 | -5155.44 | n/a    | n/a    | 1.9603 | 0.2728 | 0.2069 | 0.2697 | 0.2507 | 0.05 | 0.06 | 0.13 | 0.06 | 0.22 | 0.02 | 0.06 | 0.17 | 0.04 | 0.15 | 0.02 | 0.04 |
| HKY           | 11311.47        | 10533.19 | -5179.46 | n/a    | n/a    | 2.3622 | 0.2728 | 0.2069 | 0.2697 | 0.2507 | 0.03 | 0.04 | 0.18 | 0.04 | 0.19 | 0.04 | 0.04 | 0.15 | 0.04 | 0.19 | 0.03 | 0.04 |
| JC            | 11598.05        | 10855.54 | -5344.65 | n/a    | n/a    | 0.5    | 0.25   | 0.25   | 0.25   | 0.25   | 0.08 | 0.08 | 0.08 | 0.08 | 0.08 | 0.08 | 0.08 | 0.08 | 0.08 | 0.08 | 0.08 | 0.08 |

\*Model with the lowest BIC scores depicts the substitution pattern best (shown in bold red). For each model. A total of 1326 positions existed in the final dataset. Abbreviations: GTR: General Time Reversible; TN93: Tamura-Nei; K2: Kimura 2-parameter; HKY: Hasegawa-Kishino-Yano; T92: Tamura 3-parameter; JC: Jukes-Cantor.

Table S16. Best fitting model selection for mature VP3 using Maximum Likelihood fits of 24 different nucleotide substitution models.

| Model          | BIC            | AICc    | lnL      | I      | G      | R      | FreqA  | FreqT  | FreqC  | FreqG  | A=>T | A=>C | A=>G | T=>A | T=>C | T=>G | C=>A | C=>T | C=>G | G=>A | G=>T | G=>C |
|----------------|----------------|---------|----------|--------|--------|--------|--------|--------|--------|--------|------|------|------|------|------|------|------|------|------|------|------|------|
| <b>TN93+G*</b> | <b>6491.22</b> | 5743.06 | -2782.29 | n/a    | 0.2263 | 3.6849 | 0.2947 | 0.1479 | 0.2805 | 0.2769 | 0.01 | 0.03 | 0.11 | 0.03 | 0.38 | 0.03 | 0.03 | 0.2  | 0.03 | 0.12 | 0.01 | 0.03 |
| TN93+G+I       | 6496.04        | 5739.48 | -2779.49 | 0.3938 | 0.5143 | 3.7681 | 0.2947 | 0.1479 | 0.2805 | 0.2769 | 0.01 | 0.03 | 0.11 | 0.03 | 0.38 | 0.03 | 0.03 | 0.2  | 0.03 | 0.12 | 0.01 | 0.03 |
| GTR+G          | 6514.50        | 5741.14 | -2778.31 | n/a    | 0.2404 | 2.8539 | 0.2947 | 0.1479 | 0.2805 | 0.2769 | 0.03 | 0.03 | 0.12 | 0.07 | 0.33 | 0.02 | 0.03 | 0.17 | 0.03 | 0.13 | 0.01 | 0.03 |
| GTR+G+I        | 6516.33        | 5734.57 | -2774.02 | 0.3853 | 0.5470 | 3.0532 | 0.2947 | 0.1479 | 0.2805 | 0.2769 | 0.03 | 0.03 | 0.12 | 0.06 | 0.34 | 0.02 | 0.03 | 0.18 | 0.02 | 0.12 | 0.01 | 0.02 |
| TN93+I         | 6518.70        | 5770.54 | -2796.03 | 0.6561 | n/a    | 3.3994 | 0.2947 | 0.1479 | 0.2805 | 0.2769 | 0.02 | 0.03 | 0.12 | 0.03 | 0.35 | 0.03 | 0.03 | 0.19 | 0.03 | 0.13 | 0.02 | 0.03 |
| K2+G           | 6522.49        | 5807.94 | -2818.75 | n/a    | 0.2293 | 3.3675 | 0.25   | 0.25   | 0.25   | 0.25   | 0.03 | 0.03 | 0.19 | 0.03 | 0.19 | 0.03 | 0.03 | 0.19 | 0.03 | 0.19 | 0.03 | 0.03 |
| HKY+G          | 6524.88        | 5785.13 | -2804.33 | n/a    | 0.2204 | 3.6425 | 0.2947 | 0.1479 | 0.2805 | 0.2769 | 0.02 | 0.03 | 0.22 | 0.03 | 0.22 | 0.03 | 0.03 | 0.12 | 0.03 | 0.23 | 0.02 | 0.03 |
| T92+G          | 6525.64        | 5802.69 | -2815.12 | n/a    | 0.2353 | 3.3392 | 0.2213 | 0.2213 | 0.2787 | 0.2787 | 0.03 | 0.03 | 0.22 | 0.03 | 0.22 | 0.03 | 0.03 | 0.17 | 0.03 | 0.17 | 0.03 | 0.03 |
| K2+G+I         | 6526.72        | 5803.77 | -2815.66 | 0.4303 | 0.5977 | 3.4353 | 0.25   | 0.25   | 0.25   | 0.25   | 0.03 | 0.03 | 0.19 | 0.03 | 0.19 | 0.03 | 0.03 | 0.19 | 0.03 | 0.19 | 0.03 | 0.03 |
| HKY+G+I        | 6528.79        | 5780.63 | -2801.07 | 0.4344 | 0.5719 | 3.7225 | 0.2947 | 0.1479 | 0.2805 | 0.2769 | 0.02 | 0.03 | 0.22 | 0.03 | 0.22 | 0.03 | 0.03 | 0.12 | 0.03 | 0.23 | 0.02 | 0.03 |
| T92+G+I        | 6530.42        | 5799.06 | -2812.30 | 0.4242 | 0.6026 | 3.4050 | 0.2213 | 0.2213 | 0.2787 | 0.2787 | 0.02 | 0.03 | 0.22 | 0.02 | 0.22 | 0.03 | 0.02 | 0.17 | 0.03 | 0.17 | 0.02 | 0.03 |
| K2+I           | 6544.23        | 5829.68 | -2829.62 | 0.6694 | n/a    | 3.2597 | 0.25   | 0.25   | 0.25   | 0.25   | 0.03 | 0.03 | 0.19 | 0.03 | 0.19 | 0.03 | 0.03 | 0.19 | 0.03 | 0.19 | 0.03 | 0.03 |
| GTR+I          | 6545.05        | 5771.69 | -2793.59 | 0.6523 | n/a    | 2.6290 | 0.2947 | 0.1479 | 0.2805 | 0.2769 | 0.03 | 0.03 | 0.13 | 0.07 | 0.31 | 0.02 | 0.03 | 0.16 | 0.03 | 0.14 | 0.01 | 0.03 |
| T92+I          | 6546.01        | 5823.06 | -2825.30 | 0.6657 | n/a    | 3.2283 | 0.2213 | 0.2213 | 0.2787 | 0.2787 | 0.03 | 0.03 | 0.21 | 0.03 | 0.21 | 0.03 | 0.03 | 0.17 | 0.03 | 0.17 | 0.03 | 0.03 |
| HKY+I          | 6547.10        | 5807.34 | -2815.43 | 0.6714 | n/a    | 3.4558 | 0.2947 | 0.1479 | 0.2805 | 0.2769 | 0.02 | 0.03 | 0.21 | 0.03 | 0.22 | 0.03 | 0.03 | 0.11 | 0.03 | 0.23 | 0.02 | 0.03 |
| TN93           | 6686.90        | 5947.14 | -2885.33 | n/a    | n/a    | 2.8157 | 0.2947 | 0.1479 | 0.2805 | 0.2769 | 0.02 | 0.03 | 0.13 | 0.04 | 0.32 | 0.03 | 0.04 | 0.17 | 0.03 | 0.14 | 0.02 | 0.03 |
| GTR            | 6703.81        | 5938.85 | -2878.17 | n/a    | n/a    | 2.2073 | 0.2947 | 0.1479 | 0.2805 | 0.2769 | 0.04 | 0.04 | 0.13 | 0.07 | 0.28 | 0.02 | 0.05 | 0.15 | 0.03 | 0.14 | 0.01 | 0.03 |
| K2             | 6708.63        | 6002.48 | -2917.03 | n/a    | n/a    | 2.7939 | 0.25   | 0.25   | 0.25   | 0.25   | 0.03 | 0.03 | 0.18 | 0.03 | 0.18 | 0.03 | 0.03 | 0.18 | 0.03 | 0.18 | 0.03 | 0.03 |
| T92            | 6709.82        | 5995.27 | -2912.41 | n/a    | n/a    | 2.7977 | 0.2213 | 0.2213 | 0.2787 | 0.2787 | 0.03 | 0.04 | 0.21 | 0.03 | 0.21 | 0.04 | 0.03 | 0.16 | 0.04 | 0.16 | 0.03 | 0.04 |
| HKY            | 6721.52        | 5990.17 | -2907.85 | n/a    | n/a    | 2.8002 | 0.2947 | 0.1479 | 0.2805 | 0.2769 | 0.02 | 0.04 | 0.2  | 0.04 | 0.21 | 0.04 | 0.04 | 0.11 | 0.04 | 0.22 | 0.02 | 0.04 |
| JC+G           | 6736.67        | 6030.52 | -2931.04 | n/a    | 0.2529 | 0.5    | 0.25   | 0.25   | 0.25   | 0.25   | 0.08 | 0.08 | 0.08 | 0.08 | 0.08 | 0.08 | 0.08 | 0.08 | 0.08 | 0.08 | 0.08 | 0.08 |
| JC+G+I         | 6745.26        | 6030.71 | -2930.13 | 0.4046 | 0.6420 | 0.5    | 0.25   | 0.25   | 0.25   | 0.25   | 0.08 | 0.08 | 0.08 | 0.08 | 0.08 | 0.08 | 0.08 | 0.08 | 0.08 | 0.08 | 0.08 | 0.08 |
| JC+I           | 6753.06        | 6046.90 | -2939.24 | 0.6627 | n/a    | 0.5    | 0.25   | 0.25   | 0.25   | 0.25   | 0.08 | 0.08 | 0.08 | 0.08 | 0.08 | 0.08 | 0.08 | 0.08 | 0.08 | 0.08 | 0.08 | 0.08 |
| JC             | 6911.39        | 6213.64 | -3023.61 | n/a    | n/a    | 0.5    | 0.25   | 0.25   | 0.25   | 0.25   | 0.08 | 0.08 | 0.08 | 0.08 | 0.08 | 0.08 | 0.08 | 0.08 | 0.08 | 0.08 | 0.08 | 0.08 |

\*Model with the lowest BIC scores (Bayesian Information Criterion) is regarded as the best describing the substitution pattern (shown in bold red).

For each model. A total of 774 positions existed in the final dataset. Abbreviations: TN93: Tamura-Nei; K2: Kimura 2-parameter; GTR: General Time Reversible; HKY: Hasegawa-Kishino-Yano; T92: Tamura 3-parameter; JC: Jukes-Cantor.

Table S17. Best fitting model selection for mature VP4 using Maximum Likelihood fits of 24 different nucleotide substitution models.

| Model        | BIC            | AICc    | lnL      | I      | G      | R      | Freq A | Freq T | Freq C | Freq G | A=>T | A=>C | A=>G | T=>A | T=>C | T=>G | C=>A | C=>T | C=>G | G=>A | G=>T | G=>C |
|--------------|----------------|---------|----------|--------|--------|--------|--------|--------|--------|--------|------|------|------|------|------|------|------|------|------|------|------|------|
| <b>K2+G*</b> | <b>6838.48</b> | 6129.04 | -2979.29 | n/a    | 0.2404 | 2.8693 | 0.25   | 0.25   | 0.25   | 0.25   | 0.03 | 0.03 | 0.19 | 0.03 | 0.19 | 0.03 | 0.03 | 0.19 | 0.03 | 0.19 | 0.03 | 0.03 |
| K2+G+I       | 6848.43        | 6130.64 | -2979.08 | 0.2047 | 0.3593 | 2.8788 | 0.25   | 0.25   | 0.25   | 0.25   | 0.03 | 0.03 | 0.19 | 0.03 | 0.19 | 0.03 | 0.03 | 0.19 | 0.03 | 0.19 | 0.03 | 0.03 |
| T92+G        | 6848.64        | 6130.85 | -2979.19 | n/a    | 0.2434 | 2.8573 | 0.2313 | 0.2313 | 0.2687 | 0.2687 | 0.03 | 0.03 | 0.2  | 0.03 | 0.2  | 0.03 | 0.03 | 0.17 | 0.03 | 0.17 | 0.03 | 0.03 |
| TN93+G       | 6852.47        | 6109.66 | -2965.58 | n/a    | 0.2320 | 3.0623 | 0.2464 | 0.2162 | 0.2872 | 0.2502 | 0.03 | 0.04 | 0.12 | 0.03 | 0.3  | 0.03 | 0.03 | 0.22 | 0.03 | 0.12 | 0.03 | 0.04 |
| K2+I         | 6853.34        | 6143.90 | -2986.71 | 0.6423 | n/a    | 2.7934 | 0.25   | 0.25   | 0.25   | 0.25   | 0.03 | 0.03 | 0.18 | 0.03 | 0.18 | 0.03 | 0.03 | 0.18 | 0.03 | 0.18 | 0.03 | 0.03 |
| T92+G+I      | 6858.49        | 6132.37 | -2978.94 | 0.2160 | 0.3751 | 2.8548 | 0.2313 | 0.2313 | 0.2687 | 0.2687 | 0.03 | 0.03 | 0.2  | 0.03 | 0.2  | 0.03 | 0.03 | 0.17 | 0.03 | 0.17 | 0.03 | 0.03 |
| GTR+G        | 6859.93        | 6092.11 | -2953.78 | n/a    | 0.2331 | 3.0823 | 0.2464 | 0.2162 | 0.2872 | 0.2502 | 0.04 | 0.04 | 0.12 | 0.05 | 0.3  | 0.04 | 0.03 | 0.22 | 0.01 | 0.11 | 0.03 | 0.01 |
| HKY+G        | 6861.21        | 6126.74 | -2975.12 | n/a    | 0.2372 | 2.9131 | 0.2464 | 0.2162 | 0.2872 | 0.2502 | 0.03 | 0.04 | 0.19 | 0.03 | 0.21 | 0.03 | 0.03 | 0.16 | 0.03 | 0.18 | 0.03 | 0.04 |
| TN93+G+I     | 6862.33        | 6111.18 | -2965.33 | 0      | 0.2317 | 3.0651 | 0.2464 | 0.2162 | 0.2872 | 0.2502 | 0.03 | 0.04 | 0.12 | 0.03 | 0.3  | 0.03 | 0.03 | 0.22 | 0.03 | 0.12 | 0.03 | 0.04 |
| T92+I        | 6863.38        | 6145.59 | -2986.56 | 0.6404 | n/a    | 2.7812 | 0.2313 | 0.2313 | 0.2687 | 0.2687 | 0.03 | 0.04 | 0.2  | 0.03 | 0.2  | 0.04 | 0.03 | 0.17 | 0.04 | 0.17 | 0.03 | 0.04 |
| TN93+I       | 6867.22        | 6124.42 | -2972.95 | 0.6392 | n/a    | 3.0076 | 0.2464 | 0.2162 | 0.2872 | 0.2502 | 0.03 | 0.04 | 0.12 | 0.03 | 0.29 | 0.03 | 0.03 | 0.22 | 0.03 | 0.12 | 0.03 | 0.04 |
| GTR+G+I      | 6870.29        | 6094.12 | -2953.78 | 0.0000 | 0.2325 | 3.0878 | 0.2464 | 0.2162 | 0.2872 | 0.2502 | 0.04 | 0.04 | 0.12 | 0.05 | 0.3  | 0.04 | 0.03 | 0.22 | 0.01 | 0.11 | 0.03 | 0.01 |
| HKY+G+I      | 6871.23        | 6128.42 | -2974.96 | 0.1794 | 0.3332 | 2.9318 | 0.2464 | 0.2162 | 0.2872 | 0.2502 | 0.03 | 0.04 | 0.19 | 0.03 | 0.21 | 0.03 | 0.03 | 0.16 | 0.03 | 0.18 | 0.03 | 0.04 |
| HKY+I        | 6876.08        | 6141.61 | -2982.56 | 0.6440 | n/a    | 2.8664 | 0.2464 | 0.2162 | 0.2872 | 0.2502 | 0.03 | 0.04 | 0.19 | 0.03 | 0.21 | 0.03 | 0.03 | 0.16 | 0.03 | 0.18 | 0.03 | 0.04 |
| GTR+I        | 6876.76        | 6108.94 | -2962.19 | 0.6359 | n/a    | 3.0726 | 0.2464 | 0.2162 | 0.2872 | 0.2502 | 0.04 | 0.04 | 0.12 | 0.05 | 0.3  | 0.04 | 0.04 | 0.22 | 0.01 | 0.12 | 0.03 | 0.01 |
| JC+G         | 7040.04        | 6338.94 | -3085.24 | n/a    | 0.2800 | 0.5    | 0.25   | 0.25   | 0.25   | 0.25   | 0.08 | 0.08 | 0.08 | 0.08 | 0.08 | 0.08 | 0.08 | 0.08 | 0.08 | 0.08 | 0.08 | 0.08 |
| K2           | 7045.55        | 6344.45 | -3087.99 | n/a    | n/a    | 2.2651 | 0.25   | 0.25   | 0.25   | 0.25   | 0.04 | 0.04 | 0.17 | 0.04 | 0.17 | 0.04 | 0.04 | 0.17 | 0.04 | 0.17 | 0.04 | 0.04 |
| JC+G+I       | 7049.88        | 6340.43 | -3084.98 | 0.2340 | 0.4575 | 0.5    | 0.25   | 0.25   | 0.25   | 0.25   | 0.08 | 0.08 | 0.08 | 0.08 | 0.08 | 0.08 | 0.08 | 0.08 | 0.08 | 0.08 | 0.08 | 0.08 |
| JC+I         | 7052.42        | 6351.32 | -3091.43 | 0.6288 | n/a    | 0.5    | 0.25   | 0.25   | 0.25   | 0.25   | 0.08 | 0.08 | 0.08 | 0.08 | 0.08 | 0.08 | 0.08 | 0.08 | 0.08 | 0.08 | 0.08 | 0.08 |
| T92          | 7053.21        | 6343.76 | -3086.65 | n/a    | n/a    | 2.2690 | 0.2313 | 0.2313 | 0.2687 | 0.2687 | 0.04 | 0.04 | 0.19 | 0.04 | 0.19 | 0.04 | 0.04 | 0.16 | 0.04 | 0.16 | 0.04 | 0.04 |
| TN93         | 7064.22        | 6329.76 | -3076.63 | n/a    | n/a    | 2.2807 | 0.2464 | 0.2162 | 0.2872 | 0.2502 | 0.03 | 0.04 | 0.13 | 0.04 | 0.25 | 0.04 | 0.04 | 0.19 | 0.04 | 0.13 | 0.03 | 0.04 |
| HKY          | 7072.47        | 6346.35 | -3085.93 | n/a    | n/a    | 2.2710 | 0.2464 | 0.2162 | 0.2872 | 0.2502 | 0.03 | 0.04 | 0.17 | 0.04 | 0.2  | 0.04 | 0.04 | 0.15 | 0.04 | 0.17 | 0.03 | 0.04 |
| GTR          | 7087.78        | 6328.29 | -3072.88 | n/a    | n/a    | 1.8552 | 0.2464 | 0.2162 | 0.2872 | 0.2502 | 0.05 | 0.06 | 0.13 | 0.06 | 0.23 | 0.03 | 0.05 | 0.17 | 0.04 | 0.13 | 0.03 | 0.04 |
| JC           | 7225.59        | 6532.83 | -3183.19 | n/a    | n/a    | 0.5    | 0.25   | 0.25   | 0.25   | 0.25   | 0.08 | 0.08 | 0.08 | 0.08 | 0.08 | 0.08 | 0.08 | 0.08 | 0.08 | 0.08 | 0.08 | 0.08 |

\*Model with the lowest BIC scores (Bayesian Information Criterion) is considered to describe the substitution pattern best (shown in bold red). For each model. A total of 730 positions existed in the final dataset. Abbreviations: K2: Kimura 2-parameter; TN93: Tamura-Nei; GTR: General Time Reversible; HKY: Hasegawa-Kishino-Yano; T92: Tamura 3-parameter; JC: Jukes-Cantor.

Table S18. Best fitting model selection for mature VP5 using Maximum Likelihood fits of 24 different nucleotide substitution models.

| Model        | BIC            | AICc    | lnL      | I      | G      | R      | Freq A | Freq T | Freq C | Freq G | A=>T | A=>C | A=>G | T=>A | T=>C | T=>G | C=>A | C=>T | C=>G | G=>A | G=>T | G=>C |
|--------------|----------------|---------|----------|--------|--------|--------|--------|--------|--------|--------|------|------|------|------|------|------|------|------|------|------|------|------|
| <b>K2+G*</b> | <b>3123.76</b> | 2456.48 | -1142.86 | n/a    | 0.1777 | 2.0439 | 0.25   | 0.25   | 0.25   | 0.25   | 0.04 | 0.04 | 0.17 | 0.04 | 0.17 | 0.04 | 0.04 | 0.17 | 0.04 | 0.17 | 0.04 | 0.04 |
| K2+G+I       | 3131.17        | 2456.04 | -1141.63 | 0.5461 | 0.6866 | 2.1155 | 0.25   | 0.25   | 0.25   | 0.25   | 0.04 | 0.04 | 0.17 | 0.04 | 0.17 | 0.04 | 0.04 | 0.17 | 0.04 | 0.17 | 0.04 | 0.04 |
| T92+G        | 3132.03        | 2456.90 | -1142.06 | n/a    | 0.1816 | 2.0326 | 0.2388 | 0.2388 | 0.2612 | 0.2612 | 0.04 | 0.04 | 0.18 | 0.04 | 0.18 | 0.04 | 0.04 | 0.16 | 0.04 | 0.16 | 0.04 | 0.04 |
| T92+G+I      | 3139.59        | 2456.62 | -1140.91 | 0.5437 | 0.6808 | 2.1262 | 0.2388 | 0.2388 | 0.2612 | 0.2612 | 0.04 | 0.04 | 0.18 | 0.04 | 0.18 | 0.04 | 0.04 | 0.16 | 0.04 | 0.16 | 0.04 | 0.04 |
| K2+I         | 3140.60        | 2473.31 | -1151.27 | 0.4256 | n/a    | 1.8506 | 0.25   | 0.25   | 0.25   | 0.25   | 0.04 | 0.04 | 0.16 | 0.04 | 0.16 | 0.04 | 0.04 | 0.16 | 0.04 | 0.16 | 0.04 | 0.04 |
| HKY+G        | 3146.55        | 2455.74 | -1139.46 | n/a    | 0.1728 | 2.0715 | 0.2651 | 0.2125 | 0.2772 | 0.2451 | 0.03 | 0.04 | 0.17 | 0.04 | 0.19 | 0.04 | 0.04 | 0.14 | 0.04 | 0.18 | 0.03 | 0.04 |
| T92+I        | 3148.54        | 2473.42 | -1150.32 | 0.4256 | n/a    | 1.8490 | 0.2388 | 0.2388 | 0.2612 | 0.2612 | 0.04 | 0.05 | 0.17 | 0.04 | 0.17 | 0.05 | 0.04 | 0.16 | 0.05 | 0.16 | 0.04 | 0.05 |
| K2           | 3149.35        | 2489.91 | -1160.58 | n/a    | n/a    | 1.7927 | 0.25   | 0.25   | 0.25   | 0.25   | 0.04 | 0.04 | 0.16 | 0.04 | 0.16 | 0.04 | 0.04 | 0.16 | 0.04 | 0.16 | 0.04 | 0.04 |
| JC+G         | 3149.77        | 2490.33 | -1160.79 | n/a    | 0.1972 | 0.5    | 0.25   | 0.25   | 0.25   | 0.25   | 0.08 | 0.08 | 0.08 | 0.08 | 0.08 | 0.08 | 0.08 | 0.08 | 0.08 | 0.08 | 0.08 | 0.08 |
| TN93+G       | 3153.68        | 2455.03 | -1138.09 | n/a    | 0.1772 | 2.0927 | 0.2651 | 0.2125 | 0.2772 | 0.2451 | 0.03 | 0.04 | 0.12 | 0.04 | 0.24 | 0.04 | 0.04 | 0.18 | 0.04 | 0.13 | 0.03 | 0.04 |
| HKY+G+I      | 3156.63        | 2457.99 | -1139.57 | 0.5589 | 0.6624 | 2.6127 | 0.2651 | 0.2125 | 0.2772 | 0.2451 | 0.03 | 0.04 | 0.18 | 0.04 | 0.2  | 0.03 | 0.04 | 0.15 | 0.03 | 0.19 | 0.03 | 0.04 |
| T92          | 3157.19        | 2489.90 | -1159.57 | n/a    | n/a    | 1.7933 | 0.2388 | 0.2388 | 0.2612 | 0.2612 | 0.04 | 0.05 | 0.17 | 0.04 | 0.17 | 0.05 | 0.04 | 0.15 | 0.05 | 0.15 | 0.04 | 0.05 |
| JC+G+I       | 3157.89        | 2490.60 | -1159.92 | 0.5046 | 0.6782 | 0.5    | 0.25   | 0.25   | 0.25   | 0.25   | 0.08 | 0.08 | 0.08 | 0.08 | 0.08 | 0.08 | 0.08 | 0.08 | 0.08 | 0.08 | 0.08 | 0.08 |
| TN93+G+I     | 3161.25        | 2454.76 | -1136.95 | 0.5322 | 0.6465 | 2.1571 | 0.2651 | 0.2125 | 0.2772 | 0.2451 | 0.03 | 0.04 | 0.12 | 0.04 | 0.24 | 0.04 | 0.04 | 0.19 | 0.04 | 0.13 | 0.03 | 0.04 |
| HKY+I        | 3163.84        | 2473.04 | -1148.11 | 0.4256 | n/a    | 1.8572 | 0.2651 | 0.2125 | 0.2772 | 0.2451 | 0.04 | 0.05 | 0.16 | 0.05 | 0.18 | 0.04 | 0.05 | 0.14 | 0.04 | 0.17 | 0.04 | 0.05 |
| JC+I         | 3164.90        | 2505.45 | -1168.35 | 0.4256 | n/a    | 0.5    | 0.25   | 0.25   | 0.25   | 0.25   | 0.08 | 0.08 | 0.08 | 0.08 | 0.08 | 0.08 | 0.08 | 0.08 | 0.08 | 0.08 | 0.08 | 0.08 |
| TN93+I       | 3170.72        | 2472.07 | -1146.62 | 0.4256 | n/a    | 1.8692 | 0.2651 | 0.2125 | 0.2772 | 0.2451 | 0.04 | 0.05 | 0.12 | 0.05 | 0.23 | 0.04 | 0.05 | 0.17 | 0.04 | 0.13 | 0.04 | 0.05 |
| HKY          | 3172.80        | 2489.83 | -1157.51 | n/a    | n/a    | 1.7944 | 0.2651 | 0.2125 | 0.2772 | 0.2451 | 0.04 | 0.05 | 0.16 | 0.05 | 0.18 | 0.04 | 0.05 | 0.14 | 0.04 | 0.17 | 0.04 | 0.05 |
| JC           | 3172.95        | 2521.35 | -1177.31 | n/a    | n/a    | 0.5    | 0.25   | 0.25   | 0.25   | 0.25   | 0.08 | 0.08 | 0.08 | 0.08 | 0.08 | 0.08 | 0.08 | 0.08 | 0.08 | 0.08 | 0.08 | 0.08 |
| TN93         | 3179.69        | 2488.88 | -1156.03 | n/a    | n/a    | 1.8004 | 0.2651 | 0.2125 | 0.2772 | 0.2451 | 0.04 | 0.05 | 0.12 | 0.05 | 0.22 | 0.04 | 0.05 | 0.17 | 0.04 | 0.13 | 0.04 | 0.05 |
| GTR+G        | 3179.79        | 2457.62 | -1136.36 | n/a    | 0.1723 | 2.1684 | 0.2651 | 0.2125 | 0.2772 | 0.2451 | 0.04 | 0.06 | 0.12 | 0.05 | 0.24 | 0.05 | 0.06 | 0.19 | 0.01 | 0.13 | 0.04 | 0.01 |
| GTR+G+I      | 3187.86        | 2457.85 | -1135.47 | 0.5578 | 0.5991 | 2.4218 | 0.2651 | 0.2125 | 0.2772 | 0.2451 | 0.04 | 0.06 | 0.13 | 0.05 | 0.25 | 0.05 | 0.05 | 0.19 | 0    | 0.14 | 0.04 | 0    |
| GTR+I        | 3196.93        | 2474.76 | -1144.93 | 0.4256 | n/a    | 1.8817 | 0.2651 | 0.2125 | 0.2772 | 0.2451 | 0.04 | 0.07 | 0.12 | 0.05 | 0.23 | 0.04 | 0.06 | 0.17 | 0.02 | 0.13 | 0.04 | 0.02 |
| GTR          | 3208.38        | 2494.05 | -1155.58 | n/a    | n/a    | 1.4934 | 0.2651 | 0.2125 | 0.2772 | 0.2451 | 0.04 | 0.07 | 0.12 | 0.05 | 0.2  | 0.04 | 0.06 | 0.15 | 0.04 | 0.13 | 0.03 | 0.05 |

\*Model with the lowest BIC scores (Bayesian Information Criterion) is considered to describe the substitution pattern best (shown in bold red). For each model. A total of 450 positions existed in the final dataset. Abbreviations: K2: Kimura 2-parameter; TN93: Tamura-Nei; GTR: General Time Reversible; HKY: Hasegawa-Kishino-Yano; T92: Tamura 3-parameter; JC: Jukes-Cantor.
